# Supplementary material for: Preferences for group arts therapies: a cross-sectional survey of mental health patients and the general population
Source: PubMed Central journal article supplement — BMJ Open. 2021 Aug 9;11(8):e051173. doi: 10.1136/bmjopen-2021-051173 (PMC8354273; doi:10.1136/bmjopen-2021-051173), 2021-08-09
Supplement: bmjopen-2021-051173.draft_revisions.pdf [file bmjopen-2021-051173.draft_revisions.pdf]

# BMJ Open

BMJ Open is committed to open peer review. As part of this commitment we make the peer review history of every article we publish publicly available.

When an article is published we post the peer reviewers' comments and the authors' responses online. We also post the versions of the paper that were used during peer review. These are the versions that the peer review comments apply to.

The versions of the paper that follow are the versions that were submitted during the peer review process. They are not the versions of record or the final published versions. They should not be cited or distributed as the published version of this manuscript.

BMJ Open is an open access journal and the full, final, typeset and author-corrected version of record of the manuscript is available on our site with no access controls, subscription charges or pay-per-view fees (<http://bmjopen.bmj.com>).

If you have any questions on BMJ Open's open peer review process please email [info.bmjopen@bmj.com](mailto:info.bmjopen@bmj.com)

# BMJ Open

## Preferences for Group Arts Therapies: A Cross-Sectional Survey of Mental Health Patients and the General Population

|                               |                                                                                                                                                                                                                                                                                                                                                                                                                          |
|-------------------------------|--------------------------------------------------------------------------------------------------------------------------------------------------------------------------------------------------------------------------------------------------------------------------------------------------------------------------------------------------------------------------------------------------------------------------|
| Journal:                      | <i>BMJ Open</i>                                                                                                                                                                                                                                                                                                                                                                                                          |
| Manuscript ID                 | bmjopen-2021-051173                                                                                                                                                                                                                                                                                                                                                                                                      |
| Article Type:                 | Original research                                                                                                                                                                                                                                                                                                                                                                                                        |
| Date Submitted by the Author: | 11-Mar-2021                                                                                                                                                                                                                                                                                                                                                                                                              |
| Complete List of Authors:     | Millard, Emma; Queen Mary University of London, Unit for Social and Community Psychiatry; East London NHS Foundation Trust<br>Medlicott, Emma; East London NHS Foundation Trust<br>Cardona, Jessica; East London NHS Foundation Trust<br>Priebe, Stefan; Queen Mary University of London, Unit for Social and Community Psychiatry<br>Carr, Catherine; Queen Mary University of London; East London NHS Foundation Trust |
| Keywords:                     | Adult psychiatry < PSYCHIATRY, PSYCHIATRY, Depression & mood disorders < PSYCHIATRY, Schizophrenia & psychotic disorders < PSYCHIATRY                                                                                                                                                                                                                                                                                    |
|                               |                                                                                                                                                                                                                                                                                                                                                                                                                          |

SCHOLARONE™  
Manuscripts

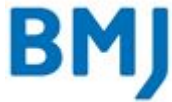

I, the Submitting Author has the right to grant and does grant on behalf of all authors of the Work (as defined in the below author licence), an exclusive licence and/or a non-exclusive licence for contributions from authors who are: i) UK Crown employees; ii) where BMJ has agreed a CC-BY licence shall apply, and/or iii) in accordance with the terms applicable for US Federal Government officers or employees acting as part of their official duties; on a worldwide, perpetual, irrevocable, royalty-free basis to BMJ Publishing Group Ltd ("BMJ") its licensees and where the relevant Journal is co-owned by BMJ to the co-owners of the Journal, to publish the Work in this journal and any other BMJ products and to exploit all rights, as set out in our [licence](#).

The Submitting Author accepts and understands that any supply made under these terms is made by BMJ to the Submitting Author unless you are acting as an employee on behalf of your employer or a postgraduate student of an affiliated institution which is paying any applicable article publishing charge ("APC") for Open Access articles. Where the Submitting Author wishes to make the Work available on an Open Access basis (and intends to pay the relevant APC), the terms of reuse of such Open Access shall be governed by a Creative Commons licence – details of these licences and which [Creative Commons](#) licence will apply to this Work are set out in our licence referred to above.

Other than as permitted in any relevant BMJ Author's Self Archiving Policies, I confirm this Work has not been accepted for publication elsewhere, is not being considered for publication elsewhere and does not duplicate material already published. I confirm all authors consent to publication of this Work and authorise the granting of this licence.

1  
2  
3 **Preferences for Group Arts Therapies: A Cross-Sectional Survey of Mental Health Patients and the**  
4 **General Population**  
5  
6

7 Emma Millard<sup>1,2\*</sup>, Emma Medicott<sup>2</sup>, Jessica Cardona<sup>2</sup>, Stefan Priebe<sup>1</sup>, Catherine Carr<sup>1,2</sup>  
8  
9

10 <sup>1</sup>Unit for Social and Community Psychiatry, Queen Mary University of London, UK  
11

12 <sup>2</sup>East London NHS Foundation Trust, UK  
13  
14

15 \*Corresponding author: Emma Millard, Unit for Social and Community Psychiatry, Queen Mary  
16 University of London, Glen Road, E14 8SP, 020 7540 4380, [e.h.millard@qmul.ac.uk](mailto:e.h.millard@qmul.ac.uk)  
17  
18

19 Key words  
20

21 Arts therapies, preferences, psychiatry, survey  
22  
23

24 Word Count  
25

26 3,872  
27  
28  
29  
30  
31  
32  
33  
34  
35  
36  
37  
38  
39  
40  
41  
42  
43  
44  
45  
46  
47  
48  
49  
50  
51  
52  
53  
54  
55  
56  
57  
58  
59  
60

## Abstract

### *Objectives*

The arts therapies include music therapy, dance-movement therapy, art therapy and dramatherapy. Preferences for the art forms may play an important role in engagement. This survey was an initial exploration of who is interested in the arts therapies, what they would choose, and why.

### *Design*

An online cross-sectional survey of demographics, interest in and preferences for the arts therapies was designed in collaboration with patients. Summary statistics, multinomial logistic regression and thematic analysis were used to analyse the data.

### *Setting*

Thirteen NHS mental health trusts in the UK asked mental health patients and members of the general population to participate.

### *Participants*

A total of 1541 participants completed the survey; 685 mental health patients and 856 members of the general population. All participants were over 18 years old, had capacity to give informed consent and sufficient understanding of English to complete the survey. Mental health patients also had to be using secondary mental health services.

### *Results*

Approximately 60% of participants would be interested in taking part in group arts therapies. Relevant socio-demographic and clinical characteristics included gender, ethnicity, education levels and diagnosis. Participants were consistently more likely to choose the arts therapies modality that they had previous experience of. The reasons given for preferences were grouped into the themes of enjoyment, expectations of helpfulness, feeling capable, impact on mood, creating something, social interaction and the unknown.

### *Conclusions*

The findings suggest that large proportions of samples of the general population and of patients express an interest in arts therapies. Personal characteristics predict general interest as well as

1  
2  
3 preferences for a specific modality, with previous experience being associated with a preference for  
4 the same modality. The findings may justify the wide provision of arts therapies and the offer of  
5 more than one modality to interested patients.  
6  
7

### 8 9 Strengths and limitations of this study

- 10 • This is the largest survey of the arts therapies to date, and the only survey relating to  
11 preferences for the arts therapies.
- 12 • The survey's simple format made it accessible and recruitment was able to continue during  
13 the COVID-19 pandemic.
- 14 • The survey results give insight into uninformed preferences, future research should examine  
15 what patients really choose when they are offered arts therapies.  
16  
17  
18  
19  
20  
21  
22  
23  
24

### 25 Introduction

26  
27 The arts therapies is an umbrella term encompassing art therapy, music therapy, drama therapy and  
28 dance-movement therapy. They are a group of psychotherapeutic interventions which make use of  
29 specific art-forms. In the UK, the arts therapies are delivered by qualified and regulated therapists,  
30 who draw on a number of different theoretical frameworks including psychodynamic, humanistic,  
31 attachment and person-centred approaches (1). There is a focus on the therapeutic relationship and  
32 exploration of the patient's feelings and experiences through active engagement with the art form  
33 (2). In a session, interactions are usually spontaneous, with the therapist responding to the feelings  
34 and reflections which arise in the moment. There are many different ways to use the creative art  
35 forms, although improvisation and playfulness are usually encouraged and supported (3). The  
36 primarily non-verbal approach makes the arts therapies well-placed to work with patients who find  
37 verbal interaction difficult, such as those with learning disabilities, dementia or severe mental illness  
38 (4). Arts therapists work across many different settings, including as part of an arts therapies service,  
39 a multi-disciplinary team, or as lone-workers, and provide treatment both individually and in groups  
40 (5). In individual work, the therapeutic relationship between therapist and patient is key, in groups  
41 there is also an emphasis on supporting healthy interactions between group members (6).  
42  
43  
44  
45  
46  
47  
48  
49  
50  
51

52  
53 Potential participants in the arts therapies will likely have had past experiences of the creative arts,  
54 whether that was at school or as hobbies (7). Therefore, their preferences and expectations may  
55 play a considerable role in their engagement and the success of therapy (8–10). Amongst the arts  
56 therapies there is an obvious sensory difference in the art form being used, e.g. the body for  
57 movement, the ears for music, the eyes for art, and a combination of these for drama. In music  
58  
59  
60

1  
2  
3 therapy there are usually instruments to play, and patients may be encouraged to take part in  
4 singing, songwriting, listening or musical improvisation. Art therapists provide a space where  
5 patients can explore different art materials, including, but not limited to, drawing, collage, model-  
6 making or painting. In dramathery there may be opportunities to explore story-telling or role-play  
7 using acting or puppets. In dance-movement therapy patients would be encouraged to move their  
8 bodies, often to music, making use of props like scarves or ribbons (4).  
9

10  
11 The arts therapies have been around since the 1940s but until recently each arts modality has been  
12 considered distinct (11). An increased understanding of common factors in therapies has helped to  
13 conceptualise aspects that the arts therapies share, as well as differences between them (12–14).  
14 Historically, trials investigating the effectiveness of the arts therapies have been small in number and  
15 poor in quality (15–23). Although the number of large-scale trials has recently grown, they have  
16 reported limited positive outcomes (24–26), likely due to methodological limitations. When there is  
17 little evidence to distinguish the benefits or harms between treatment, it is recommended that  
18 treatment decisions are guided by patient preferences (27).  
19

20  
21 Mental health patients' retrospective attitudes towards the arts therapies have been investigated by  
22 some; Heaney (1992) surveyed psychiatric inpatients about their experiences of treatment, focusing  
23 on arts therapies. The participants rated all of the therapies as favourable, with music therapy  
24 coming out top of being 'pleasurable'. All of the 'activity therapies' (music, art and recreation) in the  
25 study were considered to be of equal importance to other aspects of care (28). Silverman (2010)  
26 interviewed 15 inpatients about their perceptions of music therapy after they had attended sessions.  
27 Their feedback indicated a positive perception of their experiences and that they were able to recall  
28 features of the session (29). However, these patients' attitudes and preferences were a result of  
29 their experiences of being in a session. No research to date has looked at who would be interested in  
30 taking part in group arts therapies, what their preferences would be and why.  
31

32  
33 This study was designed as an initial exploration of these topics. The research questions were:  
34

- 35 • Who is interested in participating in group arts therapies?
- 36 • Which of the four arts modalities would people most like to take part in and why?
- 37 • Which socio-demographic and clinical characteristics are related to preferences?

### 38 39 40 Method

41  
42 This study was given ethical approval by the South Central Oxford C Research Ethics Committee  
43 (18/SC/0701) and is reported according to recommended survey guidelines (30).  
44  
45

### *Participants*

All participants were required to be aged 18 or over, with sufficient command of the English language and capacity to give informed consent.

NHS mental health trust sites became involved via the NIHR Clinical Research Network. Researchers at each site approached mental health group participants in secondary mental health services, such as inpatient wards and community mental health teams, to ask if they would like to take part. Researchers could ask any other member of the public to complete the general population group survey, including family members and colleagues. Numbers of people who declined to take part were not recorded.

### *Patient and public involvement*

The survey questions were developed in collaboration with patients and members of a multi-disciplinary research team. A draft of the analysis was read and commented on by the multi-disciplinary research team. Published results will be sent to the study sites to disseminate amongst their participants.

### *The survey*

The survey was completed electronically, in person via an iPad, or on participants' own devices whilst speaking to a researcher on the phone, and took approximately 10 minutes. The researchers were instructed to be present for the completion of the survey when possible, especially for mental health participants. There were 14 questions in the survey which focused on the participants' demographic characteristics and whether they had heard of the arts therapies, whether they would be interested in taking part, and which modality they would choose and why. A short description of the arts therapies was included in the survey.

Mental health patients gave the researcher permission to access to their medical records to look for their diagnosis and length of time in services. Length of time in services was determined from the first clinical record on the patient's profile, or from self-reported first contact with mental health services. All responses were collected via an online platform, and researchers collected identifiable information (date of birth, diagnosis and time in services) for the mental health patients on a spreadsheet. This was anonymised and emailed to XX monthly, where the information was linked up to the online responses via a unique ID number.

### *Data analysis*



1  
2  
3 All quantitative analysis was conducted in Stata V15 (31). Age groups, gender, ethnicity, level of  
4 education and time in services were collapsed into dichotomous variables. Summary statistics were  
5 used to look at the characteristics of participants. Chi<sup>2</sup> tests were conducted to look at differences  
6 between participant groups and to find variables of interest. These were entered into a multinomial  
7 logistic regression to look for significant characteristics related to interest in participating in the arts  
8 therapies, and participants' preferred arts therapy modality. This was done firstly with all data  
9 together, then separately for each group of participants (mental health patients and general  
10 population).

11  
12  
13 A subsample of reasons for their preferences were coded and grouped into themes. These themes  
14 were then used as a framework to group together the remaining responses. The themes were  
15 included in tests for associations.

## 16 17 18 Results

19  
20  
21  
22  
23 The total number of participants was 1541. Appendix A details the sample characteristics as broken  
24 down for analysis. There were some differences between the two groups, with a larger sample in the  
25 general population group (n=856) than in the mental health group (n=685). A significantly larger  
26 proportion of the general population were female (68%) and under 45 years old (62%) than in the  
27 mental health sample (49% female, 51% under 45). A significantly higher number of people in the  
28 general population were university educated (71%) than in the mental health sample (30%). A  
29 greater proportion of people in the mental health group had received talking therapies (74% vs  
30 45%). Higher numbers of people in the mental health group (42%) had attended arts therapies in the  
31 past than in the general population (12%).

32  
33  
34  
35  
36  
37  
38  
39  
40  
41  
42 Overall, around 60% of participants in both groups were interested in taking part in group arts  
43 therapies (see Table 1). The first regression model (see Appendix B) showed significant associations  
44 between interest in participating in the arts therapies and gender ( $p<0.001$ ), and previous  
45 attendance of arts therapies ( $p<0.001$ ): females were more likely than males to say they were  
46 interested in attending, as were those who had attended before. Participants who had attended  
47 before were also less likely to say they were not sure. For the mental health patients, gender  
48 ( $p=0.05$ ), education level ( $p=0.01$ ), diagnosis ( $p=0.02$ ) and previous attendance of an arts therapy  
49 ( $p<0.001$ ) were significant variables: females and people who had attended before were more likely  
50 to say that they were interested, those with a diagnosis of F2 or who were not university educated  
51 were more likely to say they were not interested in participating. In the general population sample,  
52 gender ( $p=0.01$ ), having heard of the arts therapies ( $p=0.03$ ) and attended the arts therapies  
53  
54  
55  
56  
57  
58  
59  
60

( $p=0.02$ ) were significant variables. Females and people who had heard of the arts therapies and attended arts therapies were more likely to say that they were interested. Those who had not attended were more likely to say they were not sure.

Table 1: Attendance and interest

| Question                                                        | Response | Mental health patients (n=685) | General population sample (n=856) | Total (n=1541) |
|-----------------------------------------------------------------|----------|--------------------------------|-----------------------------------|----------------|
| Have you attended music therapy?*                               | Yes      | 117 (17.08%)                   | 44 (5.14%)                        | 161 (10.45%)   |
| Have you attended dance-movement therapy?*                      | Yes      | 59 (8.61%)                     | 24 (2.8%)                         | 83 (5.39%)     |
| Have you attended art therapy?*                                 | Yes      | 230 (33.58%)                   | 57 (6.66%)                        | 287 (18.62%)   |
| Have you attended dramatherapy?*                                | Yes      | 54 (7.88%)                     | 25 (2.92%)                        | 79 (5.13%)     |
| Attended none*                                                  | Yes      | 398 (58.1%)                    | 755 (88.2%)                       | 1153 (74.82%)  |
|                                                                 |          |                                |                                   |                |
| Would you be interested in taking part in group arts therapies? | Yes      | 420 (61.4%)                    | 509 (59.53%)                      | 929 (60.36%)   |
|                                                                 | No       | 165 (24.12%)                   | 179 (20.94%)                      | 344 (22.35%)   |
|                                                                 | Not sure | 99 (14.47%)                    | 167 (19.53%)                      | 266 (17.28%)   |

\* = significant differences between groups – Chi<sup>2</sup> at 5%

Participants were asked to choose one of the four modalities that they would most like to attend.

Table 2 shows a summary of the responses.

Table 2: Most preferred arts modality

| Question                        |                        | Mental health patients (n=685) | General population sample (n=856) | Total (n=1541) |
|---------------------------------|------------------------|--------------------------------|-----------------------------------|----------------|
| Which type would you MOST like? | Music therapy          | 282 (41.41%)                   | 271 (31.77%)                      | 553 (36.05%)   |
|                                 | Dance-movement therapy | 73 (10.72%)                    | 139 (16.3%)                       | 212 (13.82%)   |
|                                 | Art therapy            | 256 (37.59%)                   | 366 (42.91%)                      | 622 (40.55%)   |
|                                 | Dramatherapy           | 70 (10.28%)                    | 77 (9.03%)                        | 147 (9.58%)    |

When both groups were combined in the regression, participant group ( $p=0.02$ ), gender ( $p<0.001$ ), previous attendance of music therapy ( $p<0.001$ ), dance-movement therapy ( $p=0.002$ ), art therapy ( $p<0.001$ ) and dramatherapy ( $p=0.002$ ) were all significantly associated with most preferred arts therapy modality (Appendix C). Significant variables for the mental health patients were gender ( $p<0.001$ ), whether someone was White British or BAME ( $p=0.05$ ) and previous attendance of music therapy ( $p<0.001$ ), dance-movement therapy ( $p=0.02$ ), art therapy ( $p<0.001$ ) and dramatherapy ( $p=0.01$ ). Significant variables for the general population sample were gender ( $p<0.001$ ) and previous attendance of music therapy ( $p=0.01$ ), dance-movement therapy ( $p=0.02$ ), art therapy ( $p=0.01$ ) and dramatherapy ( $p=0.02$ ). Significant characteristics are summarised in Table 3.

Table 3: Significant characteristics for preferences

| Most preferred type           | Most likely characteristics - both groups combined                                                                                                                                                            | Most likely characteristics - mental health patients                                                                                                                                                                  | Most likely characteristics - general population sample                                                                                                                     |
|-------------------------------|---------------------------------------------------------------------------------------------------------------------------------------------------------------------------------------------------------------|-----------------------------------------------------------------------------------------------------------------------------------------------------------------------------------------------------------------------|-----------------------------------------------------------------------------------------------------------------------------------------------------------------------------|
| <b>Music therapy</b>          | <ul style="list-style-type: none"> <li>• Males</li> <li>• Mental health patients</li> <li>• Attended music therapy before</li> <li>• Not attended art therapy</li> <li>• Not attended dramatherapy</li> </ul> | <ul style="list-style-type: none"> <li>• Males</li> <li>• BAME background</li> <li>• Attended music therapy before</li> <li>• Not attended art therapy</li> </ul>                                                     | <ul style="list-style-type: none"> <li>• Males</li> <li>• Attended music therapy before</li> <li>• Not attended art therapy</li> <li>• Not attended dramatherapy</li> </ul> |
| <b>Dance-movement therapy</b> | <ul style="list-style-type: none"> <li>• Female</li> <li>• Not heard of arts therapies before</li> <li>• Attended dance-movement therapy before</li> <li>• Not attended art therapy</li> </ul>                | <ul style="list-style-type: none"> <li>• Attended dance-movement therapy before</li> <li>• Not attended art therapy</li> </ul>                                                                                        | <ul style="list-style-type: none"> <li>• Female</li> <li>• Attended music therapy before</li> <li>• Attended dance-movement therapy before</li> </ul>                       |
| <b>Art therapy</b>            | <ul style="list-style-type: none"> <li>• Females</li> <li>• general population sample</li> <li>• Attended art therapy before</li> </ul>                                                                       | <ul style="list-style-type: none"> <li>• Females</li> <li>• Attended art therapy before</li> </ul>                                                                                                                    | <ul style="list-style-type: none"> <li>• Female</li> <li>• Attended art therapy before</li> </ul>                                                                           |
| <b>Dramatherapy</b>           | <ul style="list-style-type: none"> <li>• Males</li> <li>• Attended dramatherapy before</li> </ul>                                                                                                             | <ul style="list-style-type: none"> <li>• Males</li> <li>• White British background</li> <li>• Not heard of arts therapies</li> <li>• Attended music therapy before</li> <li>• Attended dramatherapy before</li> </ul> | <ul style="list-style-type: none"> <li>• None</li> </ul>                                                                                                                    |

### Reasons for preferences

Participants were asked why they had chosen their most preferred arts modality with an open response box. These answers were grouped into seven main themes; enjoyment, expectations of helpfulness, feeling capable, impact on mood, creating something, social interaction and the unknown (see Table 4 for counts).

Table 4: Counts of themes

| Theme                       | Most like |       |
|-----------------------------|-----------|-------|
|                             | N         | %     |
| Enjoyment                   | 578       | 38.05 |
| Expectations of helpfulness | 294       | 19.35 |
| Feeling capable             | 228       | 15.01 |
| Impact on mood              | 197       | 12.97 |
| Creating something          | 67        | 4.41  |
| Social interaction          | 61        | 4.02  |
| The unknown                 | 34        | 2.24  |

## Themes

### *Enjoyment*

Enjoyment and pleasure were mentioned often. Participants sometimes related their enjoyment of the art form to previous experiences such as at school or using the art forms as hobbies. Many people said they had a personal interest in an art form and that is why they would choose it. They expected that using the art form would be fun.

*"I like to make music and have a studio at home"* (Ppt0045: Music therapy)

*"Done it before and enjoyed it, benefited from it"* (Ppt0303: Art therapy)

### *Expectations of helpfulness*

Participants often gave a reason related to how helpful they expected that arts modality to be for them. This was sometimes due to the therapeutic benefit they thought they may gain from using that art form, as well as being able to use the art form to express themselves.

*"Exercise and movement help with my depression"* (Ppt0270: Dance-movement therapy)

*"Because I know that when you draw/paint, you are in touch with a childlike part of yourself. Therefore I think it could be useful, particularly in conjunction with talking about the problem. Art taps into unconscious processes"* (Ppt0767: Art therapy)

### *Feeling capable*

Some people preferred an arts modality because they felt that they were good at it, possibly because of past experience or a natural talent. Others said they would feel more comfortable using an art form because they believed there was no need to be good at it.

*"I think I'd make a good actor"* (Ppt0224: Dramatherapy)

1  
2  
3 *"Because it's something anyone can do with any skill level. No judgement, it's what you feel*  
4 *and what drives you to put down on paper. For me it settles my head and evens me out."*

5  
6 (Ppt0620: Art therapy)  
7

#### 8 9 *Impact on mood*

10  
11 Participants spoke about how an art form may be relaxing for them or that it cheers them up. This  
12 was expected to be through different methods of engaging with the art form, including listening to  
13 calming music, the benefits of doing exercise, or just the joy of being creative.  
14

15  
16  
17 *"Because of the interaction, when you listen to music your mood improves as well. You get*  
18 *better. When you listen to different types of music your moods gets better all the time too."*

19  
20 (Ppt0295: Music therapy)  
21

22  
23 *"Dance would relax me and help to maintain fitness"* (Ppt1300: Dance-movement therapy)  
24

#### 25 26 *Creating something*

27  
28 The theme of creating something encapsulated when participants said that the creativity, or  
29 producing something, would draw them to a modality. This was most often mentioned in relation to  
30 art therapy.  
31

32  
33  
34 *"I enjoy the quite methodical work that goes into producing a piece of artwork and having a*  
35 *visual representation to have and keep"* (Ppt1330: Art therapy)  
36

37  
38 *"I like the thought of being creative and making things."* (Ppt1410: Art therapy)  
39

#### 40 41 *Social interaction*

42  
43 Some participants said that they would choose their preferred modality because it would give them  
44 a chance to be with others and socialise. It seemed that art therapy was considered a less 'sociable'  
45 modality, as each person works on their own piece of art; this was a positive thing for many people.  
46

47  
48 *"I believe it would involve the greatest amount of independent working without interaction*  
49 *with others."* (Ppt0788: Art therapy)  
50

51  
52 *"I think because I'm expressive, I'm comfortable in front of other people and being able to be*  
53 *silly boosts your self-esteem and is good for my mental health"* (Ppt1206: Dramatherapy)  
54

#### 55 56 57 *The unknown* 58 59 60

1  
2  
3 Participants gave 'not knowing' about a modality as a reason for why they might like to take part.  
4 For example, some said they would like to try it as it was something new, or that they would like to  
5 learn a new skill.  
6  
7

8  
9 *"Sounds relaxing and something that I have never done before and the other three are my*  
10 *hobbies already. Would like to get better at art."* (Ppt1124: Art therapy)

11  
12  
13 *"Never learnt an instrument and would want to muck around within one"* (Ppt1130: Music  
14 therapy)  
15  
16

### 17 Themes in relation to modalities

18  
19  
20 Figure 1 shows the different responses given for each modality preference. Music was expected to  
21 have a positive impact on mood, and to be enjoyable. Enjoyment and expectations of helpfulness  
22 were important for those choosing dance-movement therapy. Creativity was cited more often when  
23 speaking about art therapy than other modalities. Those who chose dramatherapy spoke about  
24 feeling capable more than for the other modalities.  
25  
26  
27  
28  
29  
30  
31

32 *Figure 1: Open response themes for most preferred arts therapies modality*

### 33 Discussion

34  
35  
36  
37 To our knowledge, this is the largest survey of the arts therapies ever undertaken. The results show  
38 who would be interested in group arts therapies, what they would want, and why. A relatively high  
39 proportion of people both in mental health services and in the general population would be  
40 interested in participating (61.4% and 59.5% respectively). However, when looking at the proportion  
41 of those using mental health services who had accessed arts therapies, this number was much lower  
42 (42%). It is unknown how many Trusts in the UK provide an arts therapies service, but of the sites in  
43 this survey the number was 4 out of 13 (31%). This may not be representative of arts therapies  
44 provision across the UK. We would recommend that research is conducted to ascertain this  
45 information.  
46  
47  
48  
49  
50  
51  
52

53  
54 The results indicate that preferences in the survey were heavily informed by past experiences of  
55 using that art form. The most consistent and clinically relevant predictors of preferences were  
56 previous experiences of those modalities. This is encouraging for arts therapists; people who attend  
57 sessions want to come back. Gender, ethnicity, education levels and whether someone was a mental  
58  
59  
60

1  
2  
3 health patient or from the general population were associated with interest and preferences.  
4  
5 Realistically the differences between groups were small and not absolute, and the implications of  
6 these findings are limited. It would not be possible to use these results to predict preferences on an  
7 individual level, or on a service level. We recommend that providing a wide range of treatments,  
8 including arts therapies, is likely to be beneficial to patients. There are many different reasons why  
9 someone might express an interest and a preference for the arts therapies, and it has previously  
10 been found that receiving a preferred psychosocial intervention is associated with reduced dropout  
11 and improved therapeutic alliance (8).  
12  
13  
14  
15  
16

17 Art and music therapy were the most preferred modalities. There are a number of potential  
18 explanations for this, other than them being truly more popular. Although we do not know actual  
19 provision of arts therapies in mental health services, far more people in the survey had heard of and  
20 attended art therapy and music therapy than the other two modalities. As demonstrated by the  
21 regression model, those who have attended a modality before are more likely to choose it as their  
22 preference; this held true for every modality and both participant groups. Therefore, the lower  
23 numbers of people choosing dance-movement and dramatherapy could be due to the lower  
24 availability of these modalities. It could also be argued that music and art are more 'mainstream' art  
25 forms, which most people use in their day to day lives and therefore feel more comfortable with.  
26  
27  
28  
29  
30  
31  
32

33 Another potential reason for this split is a misunderstanding of the implications of taking part in  
34 dance-movement and dramatherapy. Zajonc suggests that people are able to express preferences  
35 based on very limited information, by adhering to their past experiences and set of values (32) and  
36 many participants spoke about their past experiences of the arts, such as at school or as hobbies.  
37 Participants in this questionnaire were not informed about what the arts therapies involve, and the  
38 open responses highlighted some misconceptions. This highlights the need for clinicians to address  
39 concerns and support informed decision making. Decision aids such as leaflets, videos or taster  
40 sessions could be helpful methods of informing mental health patients about the arts therapies (7).  
41  
42  
43  
44  
45  
46  
47

48 In line with proposed common active factors across the arts therapies, this survey found that  
49 pleasure and enjoyment are important for arts therapies preferences (33). It has been suggested  
50 that people making non-consequential decisions will do so on the basis of mental pleasure, or to  
51 minimise mental displeasure (34). In the arts therapies, pleasure and playfulness may be more  
52 important than in other forms of therapy (2), as there is an emphasis on using creativity to explore  
53 different cognitive or emotional experiences (12). Fun and enjoyment are also mentioned as factors  
54 in qualitative studies of patient experiences of arts therapies (35,36).  
55  
56  
57  
58  
59  
60



1  
2  
3 It was important to participants to consider how the art form might be helpful, such as being  
4 inherently therapeutic, or a way to express themselves. This is in line with literature on the  
5 construction of preferences; people consider the pros and cons of the options and how they may  
6 benefit from them (37). Expectations of how a therapy might be helpful also play a crucial role in  
7 engagement and process (9). Patients and therapists must believe that the therapy will help them in  
8 order to make positive change (13).  
9

10  
11  
12  
13  
14 Other reasons for preferences included an impact on mood, the unknown and social interaction. In  
15 previous studies, changes in mood have been highlighted as key outcomes for people who attend  
16 the arts therapies (16,38–40). Social interaction is also a crucial element of group therapies (12),  
17 suggesting that the participants in the survey were being prudent in their decision-making.  
18  
19

### 20 21 Strengths and limitations

22  
23  
24 The simplicity of the survey meant it was popular with NHS sites and online access meant  
25 recruitment was able to continue during the COVID-19 pandemic. As the study was the first of its  
26 kind, the approach was exploratory and a sample size calculation was not deemed appropriate. The  
27 sampling technique may have led to some bias, and there were some significant difference between  
28 participant groups (mental health patients and general population). We also did not ask the general  
29 population sample whether they were mental health patients, so the groups may not have been  
30 mutually exclusive. In multivariable analysis, it is recommended that the sample size should be at  
31 least 10 times the number of variables considered (41); this was the case with our sample,  
32 suggesting that the associations are reliable.  
33  
34  
35  
36  
37  
38

39  
40 Reasons for liking something can be difficult to verbalise (32) and participants in the current study  
41 sometimes gave limited responses to the open questions. This could have been influenced by the  
42 short nature of the survey and the environment in which it was being answered, e.g. in a waiting  
43 room or shopping centre, or over the phone. A more in-depth understanding of the choices that  
44 participants made could be ascertained through individual interviews. If this research were to be  
45 conducted, the themes drawn out from the open questions in this study could provide a framework  
46 for topic guides. This survey focused on group arts therapies, whereas the results may have been  
47 different for individual therapy. There could be scope for linking these reasons for preferences to  
48 personality characteristics such as openness and extraversion (42), however this was not within the  
49 remit of this study.  
50  
51  
52  
53  
54  
55

56  
57 Zaller suggested that survey responses seem to be random and not necessarily linked to participants'  
58 preferences (43). In the current study, participants were 'forced' to choose one modality as their  
59  
60



1  
2  
3 preference. There was no option to say 'none' or 'all'. This may have created an unrealistic  
4 representation of true preferences. Participants were aware that there were no consequences to  
5 their preferences; they would not have to participate in the groups. They were also not given any  
6 information about the arts therapies, other than one sentence embedded in the survey. If someone  
7 was expressing a preference as part of their treatment pathway, they would be given more  
8 information, possibly in the form of decision aids (7). They would also be given more time to think  
9 about their decision and discuss with a mental health professional as part of a shared decision  
10 making process (44). Therefore, the responses in this survey may not translate into actual behaviour.  
11 Future research should focus on 'real life' preferences of those who are taking part in the arts  
12 therapies and whether preferences and expectations are associated with engagement.  
13  
14  
15  
16  
17  
18  
19

### 20 21 Conclusion

22  
23 This is the first study to investigate who would be interested in taking part in group arts therapies  
24 and what their preferences would be. Two thirds of participants said they would be interested in  
25 participating. Relevant characteristics for interest and preferences were varied, but previous  
26 experience of the arts therapies was consistently associated with a preference for the same  
27 modality. This is encouraging for arts therapists and services; that those who have attended the arts  
28 therapies would attend again. The findings may justify the wide provision of arts therapies and the  
29 offer of more than one modality to interested patients. Information should be provided to patients  
30 to ensure informed decision-making.  
31  
32  
33  
34  
35  
36

37 We would recommend that further research is undertaken to ascertain current arts therapies  
38 provision in mental health services in the UK, as well as a better understanding of the impact of  
39 preferences on arts therapies engagement in both research and clinical settings.  
40  
41  
42

### 43 Contributorship statement

44  
45 The study was planned and designed by Emma Millard, Catherine Carr and Stefan Priebe. Data  
46 collection was conducted by Emma Millard and researchers at each NHS site. Data preparation,  
47 analysis and write up was undertaken by all authors, with Emma Millard taking the lead.  
48  
49  
50

### 51 Funding statement

52  
53 This work was funded by East London NHS Foundation Trust as part of a PhD studentship.  
54  
55

### 56 Competing interests

57  
58  
59 None  
60

### Acknowledgements

With thanks to the ERA Study Lived Experience Advisory Panel for their advice, and all NHS Trusts involved: Barnet, Enfield and Haringey, Camden and Islington, Cornwall Partnership, Devon Partnership, ELFT, Lancashire Care, Mersey Care, NELFT, North West Boroughs, Oxford Health, Somerset Partnership, Southern Health, and West London.

### Exclusive licence

I, the Submitting Author has the right to grant and does grant on behalf of all authors of the Work (as defined in the below author licence), an exclusive licence and/or a non-exclusive licence for contributions from authors who are: i) UK Crown employees; ii) where BMJ has agreed a CC-BY licence shall apply, and/or iii) in accordance with the terms applicable for US Federal Government officers or employees acting as part of their official duties; on a worldwide, perpetual, irrevocable, royalty-free basis to BMJ Publishing Group Ltd ("BMJ") its licensees and where the relevant Journal is co-owned by BMJ to the co-owners of the Journal, to publish the Work in BMJ Open and any other BMJ products and to exploit all rights, as set out in our licence.

### Data sharing

Unpublished, anonymised data would be made available upon reasonable request.

### References

1. Karkou V, Sanderson P. Arts Therapies: A Research-based Map of the Field. Edinburgh: Elsevier; 2006.
2. Cattanach A. Process in the Arts Therapies. London: Jessica Kingsley; 1999.
3. Jones P. The Arts Therapies: A Revolution in Healthcare. 2nd ed. Oxon: Routledge; 2021.
4. Odell-Miller H, Hughes P, Westacott M. An investigation into the effectiveness of the arts therapies for adults with continuing mental health problems. *Psychother Res.* 2006;16(1):122–39.
5. Jones P. The Arts Therapies: A Revolution in Healthcare. 2nd ed. Oxon: Routledge; 2020.
6. Davies A, Richards E, Barwick N. Group Music Therapy: A group analytic approach. London: Routledge; 2015.

- 1  
2  
3 7. Millard E, Hounsell L, Fernandes J, Jakku M, Boast K, Church O, et al. How do you know what  
4 you want? Service user views on decision aids for the arts therapies. *Arts Psychother*  
5 [Internet]. 2021;73(January):101757. Available from:  
6  
7 <https://doi.org/10.1016/j.aip.2021.101757>  
8  
9
- 10  
11 8. Windle E, Tee H, Sabitova A, Jovanovic N, Priebe S, Carr C. Association of Patient Treatment  
12 Preference With Dropout and Clinical Outcomes in Adult Psychosocial Mental Health  
13 Interventions A Systematic Review and Meta-analysis. *JAMA Psychiatry*. 2019;1–9.  
14  
15
- 16  
17 9. Arnkoff DB, Glass CR, Shapiro SJ, Arnkoff DB, Shapiro SJ, Glass CR, et al. Expectations and  
18 Preferences. In: Norcross JC, editor. *Psychotherapy: Theory, Research, Practice, Training*  
19 [Internet]. Oxford University Press; 2002. p. 335–56. Available from:  
20 [http://psycnet.apa.org/psycinfo/2003-02805-](http://psycnet.apa.org/psycinfo/2003-02805-018%5Cnhttp://doi.apa.org/getdoi.cfm?doi=10.1037/0033-3204.38.4.455)  
21  
22 [018%5Cnhttp://doi.apa.org/getdoi.cfm?doi=10.1037/0033-3204.38.4.455](http://doi.apa.org/getdoi.cfm?doi=10.1037/0033-3204.38.4.455)  
23  
24  
25
- 26  
27 10. Swift JK, Callahan JL, Cooper M, Parkin SR. The impact of accommodating client preference in  
28 psychotherapy: A meta-analysis. *J Clin Psychol* [Internet]. 2018;74(11):1924–37. Available  
29 from: <http://doi.wiley.com/10.1002/jclp.22680>  
30  
31
- 32  
33 11. Hogan S. *Healing Arts: The History of Art Therapy*. Philadelphia: Jessica Kingsley; 2001.  
34  
35
- 36  
37 12. Carr C, Feldtkeller B, French J, Huet V, Karkou V, Priebe S. What makes us the same? What  
38 makes us different? Development of a shared model and manual of group therapy practice  
39 across art therapy, dance movement therapy and music therapy within community mental  
40 health care [Internet]. *The Arts in Psychotherapy*. Elsevier Ltd; 2020. 101747 p. Available  
41 from: <https://doi.org/10.1016/j.aip.2020.101747>  
42  
43
- 44  
45 13. Wampold B, Imel ZE. *The great psychotherapy debate*. 2nd ed. New York: Routledge; 2015.  
46  
47
- 48  
49 14. Priebe S, Conneely M, McCabe R, Bird V. What can clinicians do to improve outcomes across  
50 psychiatric treatments: a conceptual review of non-specific components. *Epidemiol Psychiatr*  
51 *Sci*. 2019;1–8.  
52  
53
- 54  
55 15. Baker FA, Metcalf O, Varker T, O'Donnell M. A systematic review of the efficacy of creative  
56 arts therapies in the treatment of adults with PTSD. *Psychol Trauma Theory, Res Pract Policy*.  
57 2018;10(6):643–51.  
58  
59
- 60  
61 16. Aalbers S, Fusar-Poli L, Freeman RE, Spreen M, Ket JC, Vink AC, et al. Music Therapy for  
62 Depression. *Cochrane Database Syst Rev*. 2017;

17. Geretsegger M, Ka M, Xj C, To H, Gold C. Music therapy for people with schizophrenia and schizophrenia-like disorders. 2017;(5).
18. Deshmukh S, Holmes J, Cardno A. Art therapy for people with dementia. *Cochrane Database Syst Rev*. 2018;(9).
19. Ruddy R, Milnes D. Art therapy for schizophrenia or schizophrenia-like illnesses. 2005;(4):4–6.
20. Meekums B, Karkou V, Ea N, Meekums B, Karkou V, Nelson EA. Dance movement therapy for depression. 2016;(2).
21. Ren J, Xia J. Dance therapy for schizophrenia. *Cochrane Database Syst Rev*. 2013;(10):10–2.
22. Karkou V, Meekums B. Dance movement therapy for dementia. *Cochrane Database Syst Rev*. 2017;2017(2).
23. Ruddy R, Dent-brown K. Drama therapy for schizophrenia or schizophrenia-like illnesses. 2007;(1):1–3.
24. Crawford MJ, Killaspy H, Barnes T, Barrett B, Byford S, Clayton K, et al. Group art therapy as an adjunctive treatment for people with schizophrenia: a randomised controlled trial (MATISSE). *Health Technol Assess (Rockv)* [Internet]. 2012;16(8). Available from: [www.hta.ac.uk](http://www.hta.ac.uk)
25. Crawford MJ, Gold C, Odell-Miller H, Thana L, Faber S, Assmus J, et al. International multicentre randomised controlled trial of improvisational music therapy for children with autism spectrum disorder: TIME-A study. *Health Technol Assess (Rockv)*. 2017;21(59):1–66.
26. Priebe S, Savill M, Wykes T, Bentall R, Lauber C, Reininghaus U, et al. Clinical effectiveness and cost-effectiveness of body psychotherapy in the treatment of negative symptoms of schizophrenia: A multicentre randomised controlled trial. *Health Technol Assess (Rockv)*. 2016;20(11):1–100.
27. Coulter A, Ellins J. Effectiveness of strategies for informing, educating, and involving patients. *Br Med J*. 2007;335(7609):24–7.
28. Heaney CJ. Evaluation of music therapy and other treatment modalities by adult psychiatric inpatients. *J Music Ther*. 1992;29(2):70–86.
29. Silverman MJ. Perceptions of music therapy interventions from inpatients with severe mental illness: A mixed-methods approach. *Arts Psychother*. 2010;37(3):264–8.

- 1  
2  
3 30. Kelley K, Clark B, Brown V, Sitzia J. Good practice in the conduct and reporting of survey  
4 research. *Int J Qual Heal Care*. 2003;15(3):261–6.  
5  
6  
7 31. StataCorp. *Stata Statistical Software: Release 15*. College Station, TX: StataCorp LLC; 2017.  
8  
9  
10 32. Zajonc R. Feeling and Thinking Preferences Need No Inference. *Am Psychol* [Internet].  
11 1980;35(2):151–75. Available from: <http://www.ncbi.nlm.nih.gov/pubmed/11624236>  
12  
13  
14 33. Koch SC. Arts and health: Active factors and a theory framework of embodied aesthetics. *Arts*  
15 *Psychother* [Internet]. 2017;54:85–91. Available from:  
16 <http://dx.doi.org/10.1016/j.aip.2017.02.002>  
17  
18  
19  
20 34. Cabanac M, Guillaume J, Balasko M, Fleury A. Pleasure in decision-making situations.  
21 2002;15:1–15.  
22  
23  
24 35. Windle E, Hickling LM, Jayacodi S, Carr C. The Experiences of Patients in the Synchrony Group  
25 Music Therapy Trial for Long-term Depression. *Arts Psychother* [Internet]. 2019; Available  
26 from: <https://doi.org/10.1016/j.aip.2019.101580>  
27  
28  
29  
30 36. Brady C, Moss H, Kelly BD. A fuller picture : evaluating an art therapy programme in a  
31 multidisciplinary mental health service. 2017;30–4.  
32  
33  
34 37. Slovic P. The construction of preference. *Am Psychol*. 1995;  
35  
36  
37 38. De Petrillo L, Winner E. Does art improve mood? a test of a key assumption underlying art  
38 therapy. *Art Ther*. 2005;22(4):205–12.  
39  
40  
41 39. McKinney CH, Honig TJ. Health outcomes of a series of bonny method of guided imagery and  
42 music sessions: A systematic review. *J Music Ther*. 2017;54(1):1–34.  
43  
44  
45 40. Bell CE, Robbins SJ. Effect of Art Production on Negative Mood: A Randomized, Controlled  
46 Trial. *Art Ther*. 2007;24(2):71–5.  
47  
48  
49 41. Sekaran U, Bougie R. *Research Methods for Business*. Chichester: John Wiley & Sons Ltd;  
50 2016.  
51  
52  
53 42. Kaplan SC, Levinson CA, Rodebaugh TL, Menatti A, Weeks JW. Social Anxiety and the Big Five  
54 Personality Traits: The Interactive Relationship of Trust and Openness [Internet]. Vol. 44,  
55 *Cognitive Behaviour Therapy*. Taylor & Francis; 2015. p. 212–22. Available from:  
56 <http://dx.doi.org/10.1080/16506073.2015.1008032>  
57  
58  
59  
60

- 1  
2  
3  
4  
5  
6  
7  
8  
9  
10  
11  
12  
13  
14  
15  
16  
17  
18  
19  
20  
21  
22  
23  
24  
25  
26  
27  
28  
29  
30  
31  
32  
33  
34  
35  
36  
37  
38  
39  
40  
41  
42  
43  
44  
45  
46  
47  
48  
49  
50  
51  
52  
53  
54  
55  
56  
57  
58  
59  
60
43. Zaller J, Feldman S. A Simple Theory of the Survey Response : Answering Questions versus Revealing Preferences. *Am J Pol Sci.* 1992;36(3):579–616.
44. Duncan E, Best C, Hagen S, Duncan E, Best C, Hagen S. Shared decision making interventions for people with mental health conditions. *Cochrane Database Syst Rev* [Internet]. 2010; Available from: <https://www.ncbi.nlm.nih.gov/pmc/articles/PMC7209977/>

For peer review only

1  
2  
3  
4  
5  
6  
7  
8  
9  
10  
11  
12  
13  
14  
15  
16  
17  
18  
19  
20  
21  
22  
23  
24  
25  
26  
27  
28  
29  
30  
31  
32  
33  
34  
35  
36  
37  
38  
39  
40  
41  
42  
43  
44  
45  
46  
47  
48  
49  
50  
51  
52  
53  
54  
55  
56  
57  
58  
59  
60

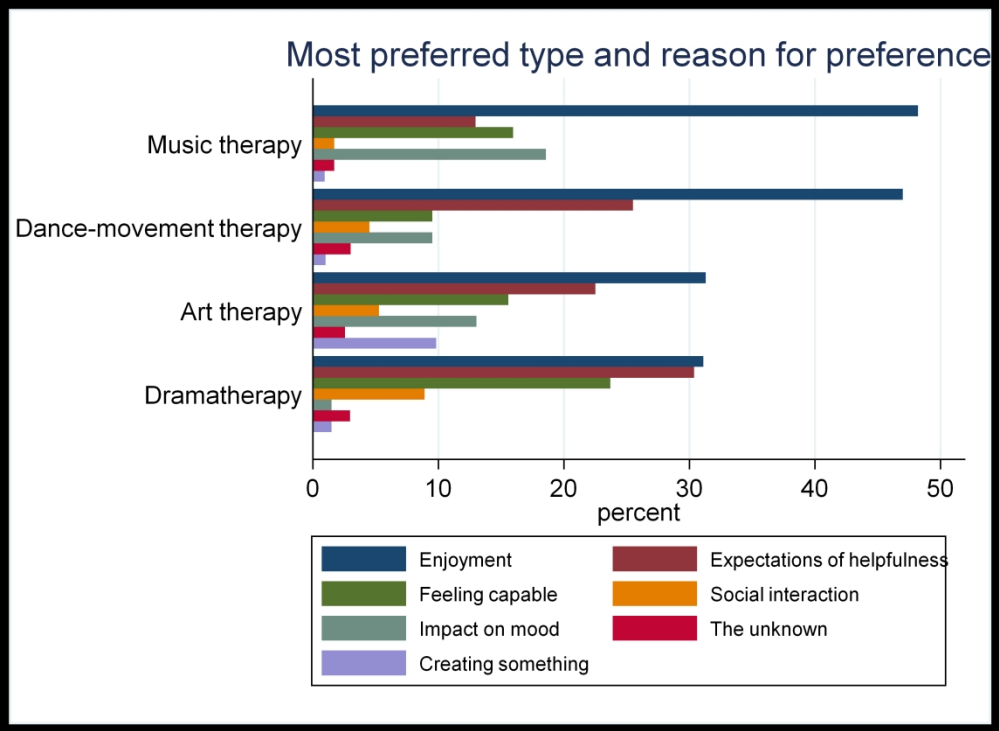

Figure 1: Open response themes for most preferred arts therapies modality

## Appendix A: Sample characteristics

| Characteristic                                  |                                                             | Mental health patients<br>(n=685) | General population sample<br>(n=856) | Total<br>(n=1541) |
|-------------------------------------------------|-------------------------------------------------------------|-----------------------------------|--------------------------------------|-------------------|
| Gender*                                         | Male                                                        | 343 (50.15%)                      | 271 (31.73%)                         | 614 (39.92%)      |
|                                                 | Female                                                      | 334 (48.83%)                      | 581 (68.03%)                         | 915 (59.49%)      |
|                                                 | Other                                                       | 7 (1.02%)                         | 2 (0.23%)                            | 9 (0.59%)         |
| Ethnic group                                    | White British                                               | 489 (73.20%)                      | 600 (72.46%)                         | 1089 (72.79%)     |
|                                                 | BAME                                                        | 179 (26.80%)                      | 228 (28.54%)                         | 407 (27.21%)      |
| Age group*                                      | Under 45                                                    | 316 (50.72%)                      | 526 (61.96%)                         | 842 (57.2%)       |
|                                                 | Over 45                                                     | 307 (49.28%)                      | 323 (38.04%)                         | 630 (42.8%)       |
| Level of education*                             | Not university educated                                     | 474 (70.01%)                      | 244 (28.94%)                         | 718 (47.24%)      |
|                                                 | University educated                                         | 203 (29.99%)                      | 599 (71.06%)                         | 802 (52.76%)      |
| Diagnosis                                       | F20-F29 Schizophrenia, schizotypal and delusional disorders | 283 (43.61%)                      |                                      |                   |
|                                                 | F30-F39 Mood (affective) disorders                          | 177 (27.27%)                      |                                      |                   |
|                                                 | Other (F0-F19, F40-F99)                                     | 189 (29.12%)                      |                                      |                   |
| Time in services                                | Less than 8 years                                           | 328 (53.51%)                      |                                      |                   |
|                                                 | More than 8 years                                           | 285 (46.49%)                      |                                      |                   |
| Part of a Trust with an arts therapies service? |                                                             | 234 (37.34%)                      |                                      |                   |
| Received a talking therapy?*                    |                                                             | 504 (74.34%)                      | 386 (45.41%)                         | 890 (58.25%)      |

\* = significant differences between groups – Chi<sup>2</sup> at 5%



Appendix B: Multinomial Logistic Regression Results: Would you be interested in taking part in group arts therapies? (Yes as base outcome)

| Participants             | Would you be interested?          | Variable                            | RRR             | Std. error | 95% CI |      |      |
|--------------------------|-----------------------------------|-------------------------------------|-----------------|------------|--------|------|------|
| All<br>(n=1510)          | Yes                               | (Base outcome)                      |                 |            |        |      |      |
|                          | No                                | Mental health or General population | 0.89            | 0.14       | 0.66   | 1.19 |      |
|                          |                                   | Male or female*                     | 0.56            | 0.07       | 0.43   | 0.72 |      |
|                          |                                   | Not uni or uni                      | 0.90            | 0.13       | 0.68   | 1.19 |      |
|                          |                                   | Heard of arts therapies             | 0.72            | 0.12       | 0.51   | 1.00 |      |
|                          |                                   | Attended arts therapies*            | 0.53            | 0.10       | 0.37   | 0.76 |      |
|                          | Not sure                          | Mental health or General population | 1.04            | 0.18       | 0.74   | 1.45 |      |
|                          |                                   | Male or female                      | 0.98            | 0.15       | 0.73   | 1.32 |      |
|                          |                                   | Not uni or uni                      | 1.13            | 0.18       | 0.83   | 1.55 |      |
|                          |                                   | Heard of arts therapies             | 1.02            | 0.21       | 0.68   | 1.52 |      |
|                          |                                   | Attended arts therapies*            | 0.42            | 0.09       | 0.28   | 0.64 |      |
|                          | Mental health patients<br>(n=651) | Yes                                 | (Base outcome)  |            |        |      |      |
|                          |                                   | No                                  | Male or female* | 0.61       | 0.12   | 0.41 | 0.91 |
|                          |                                   |                                     | Not uni or uni* | 0.61       | 0.14   | 0.38 | 0.97 |
|                          |                                   |                                     | Diagnosis F3    | 0.79       | 0.19   | 0.49 | 1.27 |
| Diagnosis Other*         |                                   |                                     | 0.51            | 0.13       | 0.31   | 0.84 |      |
| Heard of arts therapies  |                                   |                                     | 1.06            | 0.27       | 0.64   | 1.73 |      |
| Attended arts therapies* |                                   |                                     | 0.49            | 0.11       | 0.31   | 0.76 |      |
| Not sure                 |                                   | Male or female                      | 0.89            | 0.22       | 0.55   | 1.44 |      |
|                          |                                   | Not uni or uni                      | 1.63            | 0.41       | 0.99   | 2.67 |      |
|                          |                                   | Diagnosis F3                        | 1.66            | 0.49       | 0.93   | 2.97 |      |
|                          |                                   | Diagnosis Other                     | 1.00            | 0.31       | 0.55   | 1.84 |      |
|                          |                                   | Heard of arts therapies             | 0.97            | 0.30       | 0.53   | 1.77 |      |
|                          |                                   | Attended arts therapies*            | 0.39            | 0.11       | 0.22   | 0.68 |      |

|                                   |          |                          |      |      |      |      |
|-----------------------------------|----------|--------------------------|------|------|------|------|
| General population sample (n=850) | Yes      | (Base outcome)           |      |      |      |      |
|                                   | No       | Male or female*          | 0.60 | 0.11 | 0.42 | 0.86 |
|                                   |          | Not uni or uni           | 1.20 | 0.24 | 0.81 | 1.78 |
|                                   |          | Heard of arts therapies* | 0.54 | 0.13 | 0.34 | 0.86 |
|                                   |          | Attended arts therapies* | 0.44 | 0.17 | 0.21 | 0.92 |
|                                   | Not sure | Male or female           | 1.04 | 0.21 | 0.70 | 1.55 |
|                                   |          | Not uni or uni           | 0.92 | 0.18 | 0.62 | 1.36 |
|                                   |          | Heard of arts therapies  | 0.96 | 0.27 | 0.55 | 1.67 |
|                                   |          | Attended arts therapies* | 0.51 | 0.17 | 0.26 | 1.00 |

RRR=relative risk, CI=confidence interval, \*=significant variables at 5%

Appendix C: Multinomial Logistic Regression Results: Which type would you MOST prefer? (Art therapy as base outcome)

| Participants    | Type                   | Variable                             | RRR  | Std. error | 95% CI |      |
|-----------------|------------------------|--------------------------------------|------|------------|--------|------|
| All<br>(n=1505) | Music therapy          | Mental health or General population* | 0.68 | 0.10       | 0.51   | 0.91 |
|                 |                        | Male or female*                      | 0.43 | 0.06       | 0.33   | 0.55 |
|                 |                        | White British or BAME                | 1.30 | 0.19       | 0.98   | 1.74 |
|                 |                        | Not uni or uni                       | 0.81 | 0.11       | 0.61   | 1.06 |
|                 |                        | Heard of arts therapies              | 1.06 | 0.19       | 0.75   | 1.50 |
|                 |                        | Attended music therapy*              | 4.77 | 1.30       | 2.80   | 8.12 |
|                 |                        | Attended dance-movement therapy      | 1.38 | 0.51       | 0.66   | 2.85 |
|                 |                        | Attended art therapy*                | 0.26 | 0.06       | 0.17   | 0.40 |
|                 |                        | Attended dramatherapy*               | 0.48 | 0.17       | 0.23   | 0.98 |
|                 | Dance-movement therapy | Mental health or General population  | 1.15 | 0.24       | 0.77   | 1.72 |
|                 |                        | Male or female*                      | 1.61 | 0.32       | 1.09   | 2.38 |
|                 |                        | White British or BAME                | 1.39 | 0.26       | 0.96   | 2.01 |
|                 |                        | Not uni or uni                       | 1.04 | 0.20       | 0.72   | 1.51 |
|                 |                        | Heard of arts therapies*             | 0.62 | 0.14       | 0.39   | 0.97 |
|                 |                        | Attended music therapy               | 1.34 | 0.52       | 0.62   | 2.88 |
|                 |                        | Attended dance-movement therapy*     | 4.41 | 1.78       | 2.00   | 9.72 |
|                 |                        | Attended art therapy*                | 0.56 | 0.15       | 0.33   | 0.95 |
|                 |                        | Attended dramatherapy                | 1.09 | 0.44       | 0.49   | 2.42 |
|                 | Art therapy            | (Base outcome)                       |      |            |        |      |
|                 | Dramatherapy           | Mental health or General population  | 0.87 | 0.20       | 0.56   | 1.37 |
|                 |                        | Male or female *                     | 0.52 | 0.10       | 0.35   | 0.76 |
|                 |                        | White British or BAME*               | 1.54 | 0.33       | 1.01   | 2.34 |
|                 |                        | Not uni or uni                       | 1.22 | 0.26       | 0.80   | 1.86 |

|                                |                        |                                  |      |      |      |       |
|--------------------------------|------------------------|----------------------------------|------|------|------|-------|
|                                |                        | Heard of arts therapies          | 0.62 | 0.16 | 0.37 | 1.04  |
|                                |                        | Attended music therapy           | 1.95 | 0.75 | 0.91 | 4.16  |
|                                |                        | Attended dance-movement therapy  | 1.62 | 0.77 | 0.64 | 4.10  |
|                                |                        | Attended art therapy             | 0.75 | 0.22 | 0.43 | 1.32  |
|                                |                        | Attended dramatherapy*           | 2.35 | 0.88 | 1.13 | 4.88  |
| Mental health patients (n=667) | Music therapy          | Male or female *                 | 0.39 | 0.08 | 0.27 | 0.57  |
|                                |                        | White British or BAME*           | 1.72 | 0.40 | 1.10 | 2.70  |
|                                |                        | Not uni or uni                   | 0.79 | 0.17 | 0.51 | 1.21  |
|                                |                        | Interested in arts therapies     | 1.07 | 0.14 | 0.83 | 1.38  |
|                                |                        | Heard of arts therapies          | 0.99 | 0.25 | 0.60 | 1.64  |
|                                |                        | Attended music therapy*          | 5.38 | 1.82 | 2.77 | 10.45 |
|                                |                        | Attended dance-movement therapy  | 1.22 | 0.54 | 0.51 | 2.92  |
|                                |                        | Attended art therapy*            | 0.27 | 0.07 | 0.17 | 0.44  |
|                                |                        | Attended dramatherapy            | 0.73 | 0.33 | 0.31 | 1.76  |
|                                | Dance-movement therapy | Male or female                   | 1.14 | 0.34 | 0.64 | 2.04  |
|                                |                        | White British or BAME            | 1.84 | 0.59 | 0.98 | 3.45  |
|                                |                        | Not uni or uni                   | 1.61 | 0.48 | 0.90 | 2.88  |
|                                |                        | Interested in arts therapies     | 0.76 | 0.16 | 0.51 | 1.14  |
|                                |                        | Heard of arts therapies          | 0.60 | 0.22 | 0.29 | 1.23  |
|                                |                        | Attended music therapy           | 0.53 | 0.31 | 0.17 | 1.69  |
|                                |                        | Attended dance-movement therapy* | 5.00 | 2.68 | 1.74 | 14.32 |
|                                |                        | Attended art therapy*            | 0.50 | 0.17 | 0.25 | 0.98  |
|                                |                        | Attended dramatherapy            | 2.18 | 1.13 | 0.79 | 6.04  |
|                                | Art therapy            | (Base outcome)                   |      |      |      |       |
|                                | Dramatherapy           | Male or female *                 | 0.35 | 0.11 | 0.20 | 0.64  |
|                                |                        | White British or BAME*           | 1.99 | 0.65 | 1.05 | 3.79  |
|                                |                        | Not uni or uni                   | 1.38 | 0.44 | 0.74 | 2.58  |

|                                   |                        |                                  |      |      |      |       |
|-----------------------------------|------------------------|----------------------------------|------|------|------|-------|
|                                   |                        | Interested in arts therapies     | 0.67 | 0.15 | 0.42 | 1.05  |
|                                   |                        | Heard of arts therapies*         | 0.43 | 0.17 | 0.20 | 0.92  |
|                                   |                        | Attended music therapy*          | 2.58 | 1.23 | 1.02 | 6.55  |
|                                   |                        | Attended dance-movement therapy  | 1.88 | 1.05 | 0.63 | 5.59  |
|                                   |                        | Attended art therapy             | 0.64 | 0.23 | 0.31 | 1.30  |
|                                   |                        | Attended dramatherapy*           | 3.10 | 1.50 | 1.20 | 8.01  |
| General population sample (n=850) | Music therapy          | Male or female *                 | 0.43 | 0.07 | 0.30 | 0.60  |
|                                   |                        | Attended music therapy*          | 4.32 | 2.13 | 1.65 | 11.35 |
|                                   |                        | Attended dance-movement therapy  | 2.21 | 1.67 | 0.50 | 9.75  |
|                                   |                        | Attended art therapy*            | 0.21 | 0.11 | 0.08 | 0.58  |
|                                   |                        | Attended dramatherapy*           | 0.15 | 0.12 | 0.03 | 0.74  |
|                                   | Dance-movement therapy | Male or female *                 | 1.66 | 0.42 | 1.00 | 2.74  |
|                                   |                        | Attended music therapy*          | 3.39 | 1.76 | 1.22 | 9.40  |
|                                   |                        | Attended dance-movement therapy* | 7.05 | 4.58 | 1.98 | 25.15 |
|                                   |                        | Attended art therapy             | 0.47 | 0.22 | 0.19 | 1.19  |
|                                   |                        | Attended dramatherapy            | 0.29 | 0.21 | 0.07 | 1.20  |
|                                   | Art therapy            | (Base outcome)                   |      |      |      |       |
|                                   | Dramatherapy           | Male or female                   | 0.67 | 0.18 | 0.39 | 1.14  |
|                                   |                        | Attended music therapy           | 0.44 | 0.40 | 0.08 | 2.57  |
|                                   |                        | Attended dance-movement therapy  | 1.56 | 1.47 | 0.25 | 9.93  |
|                                   |                        | Attended art therapy             | 1.27 | 0.63 | 0.48 | 3.35  |
|                                   |                        | Attended dramatherapy            | 1.90 | 1.12 | 0.59 | 6.06  |

RRR=relative risk, CI=confidence interval, \*=significant variables at 5%

# BMJ Open

## Preferences for Group Arts Therapies: A Cross-Sectional Survey of Mental Health Patients and the General Population

|                                 |                                                                                                                                                                                                                                                                                                                                                                                                                          |
|---------------------------------|--------------------------------------------------------------------------------------------------------------------------------------------------------------------------------------------------------------------------------------------------------------------------------------------------------------------------------------------------------------------------------------------------------------------------|
| Journal:                        | <i>BMJ Open</i>                                                                                                                                                                                                                                                                                                                                                                                                          |
| Manuscript ID                   | bmjopen-2021-051173.R1                                                                                                                                                                                                                                                                                                                                                                                                   |
| Article Type:                   | Original research                                                                                                                                                                                                                                                                                                                                                                                                        |
| Date Submitted by the Author:   | 10-Jun-2021                                                                                                                                                                                                                                                                                                                                                                                                              |
| Complete List of Authors:       | Millard, Emma; Queen Mary University of London, Unit for Social and Community Psychiatry; East London NHS Foundation Trust<br>Medlicott, Emma; East London NHS Foundation Trust<br>Cardona, Jessica; East London NHS Foundation Trust<br>Priebe, Stefan; Queen Mary University of London, Unit for Social and Community Psychiatry<br>Carr, Catherine; Queen Mary University of London; East London NHS Foundation Trust |
| <b>Primary Subject Heading</b>: | Mental health                                                                                                                                                                                                                                                                                                                                                                                                            |
| Secondary Subject Heading:      | Patient-centred medicine                                                                                                                                                                                                                                                                                                                                                                                                 |
| Keywords:                       | Adult psychiatry < PSYCHIATRY, PSYCHIATRY, Depression & mood disorders < PSYCHIATRY, Schizophrenia & psychotic disorders < PSYCHIATRY                                                                                                                                                                                                                                                                                    |
|                                 |                                                                                                                                                                                                                                                                                                                                                                                                                          |

SCHOLARONE™  
Manuscripts



I, the Submitting Author has the right to grant and does grant on behalf of all authors of the Work (as defined in the below author licence), an exclusive licence and/or a non-exclusive licence for contributions from authors who are: i) UK Crown employees; ii) where BMJ has agreed a CC-BY licence shall apply, and/or iii) in accordance with the terms applicable for US Federal Government officers or employees acting as part of their official duties; on a worldwide, perpetual, irrevocable, royalty-free basis to BMJ Publishing Group Ltd ("BMJ") its licensees and where the relevant Journal is co-owned by BMJ to the co-owners of the Journal, to publish the Work in this journal and any other BMJ products and to exploit all rights, as set out in our [licence](#).

The Submitting Author accepts and understands that any supply made under these terms is made by BMJ to the Submitting Author unless you are acting as an employee on behalf of your employer or a postgraduate student of an affiliated institution which is paying any applicable article publishing charge ("APC") for Open Access articles. Where the Submitting Author wishes to make the Work available on an Open Access basis (and intends to pay the relevant APC), the terms of reuse of such Open Access shall be governed by a Creative Commons licence – details of these licences and which [Creative Commons](#) licence will apply to this Work are set out in our licence referred to above.

Other than as permitted in any relevant BMJ Author's Self Archiving Policies, I confirm this Work has not been accepted for publication elsewhere, is not being considered for publication elsewhere and does not duplicate material already published. I confirm all authors consent to publication of this Work and authorise the granting of this licence.

1  
2  
3 **Preferences for Group Arts Therapies: A Cross-Sectional Survey of Mental Health Patients and the**  
4 **General Population**  
5  
6

7 Emma Millard<sup>1,2</sup>\*, Emma Medicott<sup>2</sup>, Jessica Cardona<sup>2</sup>, Stefan Priebe<sup>1</sup>, Catherine Carr<sup>1,2</sup>  
8  
9

10 <sup>1</sup>Unit for Social and Community Psychiatry, Queen Mary University of London, UK  
11

12 <sup>2</sup>East London NHS Foundation Trust, UK  
13  
14

15 \*Corresponding author: Emma Millard, Unit for Social and Community Psychiatry, Queen Mary  
16 University of London, Glen Road, E14 8SP, 020 7540 4380, [e.h.millard@qmul.ac.uk](mailto:e.h.millard@qmul.ac.uk)  
17  
18

19 Key words  
20

21 Arts therapies, preferences, psychiatry, survey  
22  
23

24 Word Count  
25

26 4,705  
27  
28  
29  
30  
31  
32  
33  
34  
35  
36  
37  
38  
39  
40  
41  
42  
43  
44  
45  
46  
47  
48  
49  
50  
51  
52  
53  
54  
55  
56  
57  
58  
59  
60



## Abstract

### *Objectives*

The arts therapies include music therapy, dance-movement therapy, art therapy and dramatherapy. Preferences for art forms may play an important role in engagement with treatment. This survey was an initial exploration of who is interested in group arts therapies, what they would choose, and why.

### *Design*

An online cross-sectional survey of demographics, interest in and preferences for the arts therapies was designed in collaboration with patients. The survey took 10 minutes to complete, including informed consent, a short description of the arts therapies and 14 main questions. Summary statistics, multinomial logistic regression and thematic analysis were used to analyse the data.

### *Setting*

Thirteen NHS mental health trusts in the UK asked mental health patients and members of the general population to participate.

### *Participants*

A total of 1541 participants completed the survey; 685 mental health patients and 856 members of the general population. All participants were over 18 years old, had capacity to give informed consent and sufficient understanding of English. Mental health patients had to be using secondary mental health services.

### *Results*

Approximately 60% of participants would be interested in taking part in group arts therapies. Participants in the mental health group were more likely to choose music therapy, the general population were more likely to choose art therapy. Past experience of arts therapies was the most robust predictor of preference for that same modality. The reasons for preferences included enjoyment, expectations of helpfulness, feeling capable, impact on mood, creating something, social interaction and the unknown.

### *Conclusions*

1  
2  
3 Large proportions of the participants expressed an interest in group arts therapies. This may justify  
4 the wide provision of arts therapies and the offer of more than one modality to interested patients.  
5 It also highlights key considerations for assessment of preferences in the arts therapies as part of  
6 shared decision-making.  
7  
8  
9

### 10 Strengths and limitations of this study

- 13 • This is the largest survey of the arts therapies to date, and the only survey relating to  
14 preferences for the arts therapies.
- 16 • The survey's simple format made it accessible and recruitment was able to continue during  
17 the COVID-19 pandemic.
- 19 • The survey results give insight into preferences when there were no consequences, future  
20 research should examine what patients choose when they are offered arts therapies as a  
21 treatment.  
22  
23  
24  
25  
26  
27

### 28 Introduction

29  
30 The arts therapies is an umbrella term encompassing art therapy, music therapy, drama therapy and  
31 dance-movement therapy. They are a group of psychotherapeutic interventions which make use of  
32 specific art-forms. In the UK and several other countries, the arts therapies are delivered by qualified  
33 and regulated therapists, who draw on a number of different theoretical frameworks including  
34 psychodynamic, humanistic, attachment and person-centred approaches (1). There is a focus on the  
35 therapeutic relationship and exploration of the patient's feelings and experiences through active  
36 engagement with the art form (2). In a session, interactions are usually spontaneous, with the  
37 therapist responding to the feelings and reflections which arise in the moment. There are many  
38 different ways to use the creative art forms, although improvisation and playfulness are usually  
39 encouraged and supported (3). The primarily non-verbal approach makes the arts therapies suitable  
40 to work with patients who find verbal interaction difficult, such as those with learning disabilities,  
41 dementia or severe mental illness (4). Arts therapists work across many different settings, including  
42 as part of an arts therapies service, a multi-disciplinary team, or as lone-workers, and provide  
43 treatment both individually and in groups (5). In individual work, the therapeutic relationship  
44 between therapist and patient is key, in groups there is also an emphasis on supporting healthy  
45 interactions between group members (6). Mental health services in the UK often offer arts therapies  
46 in a group format as the experience of being in a group is well-understood to be helpful for people  
47  
48  
49  
50  
51  
52  
53  
54  
55  
56  
57  
58  
59  
60

1  
2  
3 with severe mental illness (7,8). In groups, the art forms offer a way for group members to connect  
4 with each other and the therapist on a non-verbal level (6,9,10).  
5

6  
7 Potential participants in the arts therapies will likely have had past experiences of the creative arts,  
8 whether that was at school or as hobbies (11). Therefore, their preferences and expectations may  
9 play a considerable role in their engagement and the success of therapy (12–14). Although the arts  
10 therapies share many features, including theoretical underpinning, there is a clear difference in the  
11 art form being used. In music therapy there are usually instruments to play, and patients may be  
12 encouraged to take part in singing, songwriting, listening or musical improvisation. Art therapists  
13 provide a space where patients can explore different art materials, including, but not limited to,  
14 drawing, collage, model-making or painting. In dramatherapy there may be opportunities to explore  
15 story-telling or role-play using acting or puppets. In dance-movement therapy patients would be  
16 encouraged to move their bodies, often to music, making use of props like scarves or ribbons (4).  
17  
18  
19  
20  
21  
22  
23  
24

25 The arts therapies have been around since the 1940s but until recently each arts modality has been  
26 considered distinct (15). An increased understanding of common factors in therapies has helped to  
27 conceptualise aspects that the arts therapies share, as well as differences between them (16–18).  
28 Historically, trials investigating the effectiveness of arts therapies have been small in number and  
29 poor in quality (19–27). Few large-scale trials into group arts therapies have reported positive  
30 outcomes (28–30), likely due to methodological limitations. When there is little evidence to  
31 distinguish the benefits or harms between treatment, it is recommended that treatment decisions  
32 are guided by patient preferences (31).  
33  
34  
35  
36  
37  
38

39 Mental health patients' retrospective attitudes towards the arts therapies have been investigated by  
40 some; Heaney (1992) surveyed psychiatric inpatients about their experiences of treatment, focusing  
41 on arts therapies. The participants rated all of the therapies as favourable, with music therapy  
42 coming out top of being 'pleasurable'. All of the 'activity therapies' (music, art and recreation) in the  
43 study were considered to be of equal importance to other aspects of care (32). Silverman (2010)  
44 interviewed 15 inpatients about their perceptions of music therapy after they had attended sessions.  
45 Their feedback indicated a positive perception of their experiences and that they were able to recall  
46 features of the session (33). In a meta-synthesis of 14 studies of patient experiences of music  
47 therapy, it was found that there were four main areas which patients reported to be important;  
48 "having a good time", "being together", "feeling" and "being someone" (34). More recently, Haeyen  
49 and colleagues surveyed patients with a diagnosis of personality disorder who had attended art  
50 therapy. They found five key categories of experiences: Expression of emotions, improved self-  
51 image, making own choices/autonomy, insight and changing of personal patterns, and dealing with  
52  
53  
54  
55  
56  
57  
58  
59  
60

1  
2  
3 own limitations (35). This research into experiences offers understanding of patient values, and has  
4 potential to be associated with preferences and expectations for engagement with arts therapies.  
5  
6

7 No research to date has looked at who would be interested in taking part in group arts therapies,  
8 what their preferences would be and why. Given that preferences have been found to play an  
9 important role in engagement with psychosocial treatments, and the potential for the arts therapies  
10 to offer a space where patients can make choices and be autonomous, it seems pertinent to initiate  
11 a discussion about preferences in the arts therapies.  
12  
13  
14  
15

16 The current study was designed as an initial exploration of this topic. The research questions were:  
17

- 18 • Who is interested in participating in group arts therapies?
  - 19 • Which of the four arts modalities would people most like to take part in and why?
  - 20 • Which socio-demographic and clinical characteristics are related to preferences?
- 21  
22  
23  
24

## 25 Method

26 This study was given ethical approval by the South Central Oxford C Research Ethics Committee  
27 (18/SC/0701) and is reported according to recommended survey guidelines (36).  
28  
29  
30

### 31 *Participants*

32 All participants were required to be aged 18 or over, with sufficient command of the English  
33 language and capacity to give informed consent.  
34  
35  
36

37 NHS mental health trust sites became involved via the NIHR Clinical Research Network. Researchers  
38 at each site approached mental health group participants in secondary mental health services, such  
39 as inpatient wards and community mental health teams, to ask if they would like to take part.  
40 Researchers could ask any other member of the public to complete the general population group  
41 survey, including family members and colleagues. Numbers of people who declined to take part  
42 were not recorded.  
43  
44  
45  
46  
47  
48

### 49 *Patient and public involvement*

50 The survey questions were developed in collaboration with patients and members of a multi-  
51 disciplinary research team. A draft of the analysis was read and commented on by the multi-  
52 disciplinary research team. Published results will be sent to the study sites to disseminate amongst  
53 their participants.  
54  
55  
56  
57  
58

### 59 *The survey*

1  
2  
3 The survey was created by the authors; a validated survey was not available as this is the first time  
4 the topic has been researched. The questions were developed based on topics of interest in  
5 collaboration with service users and a multi-disciplinary research team (see Appendices A and B for  
6 full surveys). Piloting of the survey was undertaken within the research team, and with mental  
7 health patients and the general population in the main study site.  
8  
9

10  
11  
12 The survey was completed electronically, in person via an ipad, or on participants' own devices  
13 whilst speaking to a researcher on the phone, and took approximately 10 minutes. The researchers  
14 were instructed to be present for the completion of the survey when possible, especially for mental  
15 health participants. There were 14 questions in the survey which focused on the participants'  
16 demographic characteristics and whether they had heard of the arts therapies, whether they would  
17 be interested in taking part, and which modality they would choose and why (as an open response).  
18 A short description of the arts therapies was included in the survey.  
19  
20  
21  
22  
23  
24

25 Mental health patients gave the researcher permission to access to their medical records to look for  
26 their diagnosis and length of time in services. Length of time in services was determined from the  
27 first clinical record on the patient's profile, or from self-reported first contact with mental health  
28 services. All responses were collected via an online platform, and researchers collected identifiable  
29 information (date of birth, diagnosis and time in services) for the mental health patients on a  
30 spreadsheet. This was anonymised and emailed to XX monthly, where the information was linked up  
31 to the online responses via a unique ID number.  
32  
33  
34  
35  
36  
37

38 Participants were given the chance to enter a £50 prize draw. They gave their personal information  
39 on a separate spreadsheet (mental health patients) or followed a link to a separate survey (general  
40 population) so that the survey responses remained anonymous.  
41  
42

#### 43 *Data analysis*

44  
45 All quantitative analysis was conducted in Stata V15 (37). Age groups, gender, ethnicity, level of  
46 education and time in services were collapsed into dichotomous variables. Summary statistics were  
47 used to look at the characteristics of participants. Chi<sup>2</sup> tests were conducted to look at differences  
48 between participant groups and to find variables of interest. These were entered into a multinomial  
49 logistic regression to look for significant characteristics related to interest in participating in the arts  
50 therapies, participants' preferred arts therapy modality, and the reasons they gave for their  
51 preferences. This was done firstly with all data together, then separately for each group of  
52 participants (mental health patients and general population). Missing data were excluded from  
53 analysis.  
54  
55  
56  
57  
58  
59  
60

1  
2  
3 A subsample of reasons for preferences were coded and grouped into themes by XX using NVivo 12  
4 (38). These themes were then used as a framework to group together the remaining responses (XX,  
5 XX and XX coded 33% each of all the open responses).  
6  
7

## 8 9 Results

10  
11 The total number of participants was 1541. Appendix C details the sample characteristics as broken  
12 down for analysis. There were some differences between the two groups, with a larger sample in the  
13 general population group (n=856) than in the mental health group (n=685). A significantly larger  
14 proportion of the general population were female (68%) and under 45 years old (62%) than in the  
15 mental health sample (49% female, 51% under 45). A significantly higher number of people in the  
16 general population were university educated (71%) than in the mental health sample (30%). A  
17 greater proportion of people in the mental health group had received talking therapies (74% vs  
18 45%). Higher numbers of people in the mental health group (42%) had attended arts therapies in the  
19 past than in the general population (12%). Levels of missing data were low for variables of interest  
20 (between 1-2%).  
21  
22

23  
24 Overall, 61.4% and 59.5% respectively of participants in the mental health group and the general  
25 population were interested in taking part in group arts therapies (see Table 1). The first regression  
26 model (see Appendix D) showed significant associations between interest in participating in the arts  
27 therapies and gender ( $p<0.001$ ), and previous attendance of arts therapies ( $p<0.001$ ): females were  
28 more likely than males to say they were interested in attending, as were those who had attended  
29 arts therapies before. Participants who had attended before were also less likely to say they were  
30 not sure.  
31  
32

33  
34 For the mental health patients, gender ( $p=0.05$ ), education level ( $p=0.01$ ), diagnosis ( $p=0.02$ ) and  
35 previous attendance of an arts therapy ( $p<0.001$ ) were significant variables: females and people who  
36 had attended before were more likely to say that they were interested, those with a diagnosis of F2  
37 or who were not university educated were more likely to say they were not interested in  
38 participating.  
39  
40

41  
42 In the general population sample, gender ( $p=0.01$ ), having heard of the arts therapies ( $p=0.03$ ) and  
43 attended the arts therapies ( $p=0.02$ ) were significant variables. Females and people who had heard  
44 of the arts therapies and attended arts therapies were more likely to say that they were interested.  
45 Those who had not attended were more likely to say they were not sure.  
46  
47  
48  
49  
50  
51  
52  
53  
54  
55  
56  
57  
58  
59  
60

Table 1: Attendance and interest

| Question                                                        | Response | Mental health patients (n=685) | General population sample (n=856) | Total (n=1541) |
|-----------------------------------------------------------------|----------|--------------------------------|-----------------------------------|----------------|
| Have you attended music therapy?*                               | Yes      | 117 (17.08%)                   | 44 (5.14%)                        | 161 (10.45%)   |
| Have you attended dance-movement therapy?*                      | Yes      | 59 (8.61%)                     | 24 (2.8%)                         | 83 (5.39%)     |
| Have you attended art therapy?*                                 | Yes      | 230 (33.58%)                   | 57 (6.66%)                        | 287 (18.62%)   |
| Have you attended dramatherapy?*                                | Yes      | 54 (7.88%)                     | 25 (2.92%)                        | 79 (5.13%)     |
| Attended none*                                                  | Yes      | 398 (58.1%)                    | 755 (88.2%)                       | 1153 (74.82%)  |
|                                                                 |          |                                |                                   |                |
| Would you be interested in taking part in group arts therapies? | Yes      | 420 (61.4%)                    | 509 (59.53%)                      | 929 (60.36%)   |
|                                                                 | No       | 165 (24.12%)                   | 179 (20.94%)                      | 344 (22.35%)   |
|                                                                 | Not sure | 99 (14.47%)                    | 167 (19.53%)                      | 266 (17.28%)   |

\* = significant differences between groups – Chi<sup>2</sup> at 5%

Participants were asked to choose one of the four modalities that they would most like to attend.

Table 2 shows a summary of the responses, and Figure 1 gives a graphical representation of the differences between groups.

Table 2: Most preferred arts therapies modality

| Question                        |                        | Mental health patients (n=685) | General population sample (n=856) | Total (n=1541) |
|---------------------------------|------------------------|--------------------------------|-----------------------------------|----------------|
| Which type would you MOST like? | Music therapy          | 282 (41.41%)                   | 271 (31.77%)                      | 553 (36.05%)   |
|                                 | Dance-movement therapy | 73 (10.72%)                    | 139 (16.3%)                       | 212 (13.82%)   |
|                                 | Art therapy            | 256 (37.59%)                   | 366 (42.91%)                      | 622 (40.55%)   |
|                                 | Dramatherapy           | 70 (10.28%)                    | 77 (9.03%)                        | 147 (9.58%)    |

When both groups were combined in the regression model (Appendix E), participant group ( $p=0.02$ ), gender ( $p<0.001$ ), previous attendance of music therapy ( $p<0.001$ ), dance-movement therapy ( $p=0.002$ ), art therapy ( $p<0.001$ ) and dramatherapy ( $p=0.002$ ) were all significantly associated with most preferred arts therapy modality. Significant variables for the mental health patients were gender ( $p<0.001$ ), whether someone was White British or BAME ( $p=0.05$ ) and previous attendance of music therapy ( $p<0.001$ ), dance-movement therapy ( $p=0.02$ ), art therapy ( $p<0.001$ ) and dramatherapy ( $p=0.01$ ). Significant variables for the general population sample were gender ( $p<0.001$ ) and previous attendance of music therapy ( $p=0.01$ ), dance-movement therapy ( $p=0.02$ ), art therapy ( $p=0.01$ ) and dramatherapy ( $p=0.02$ ). Significant characteristics for each modality are summarised in Table 3.

Table 3: Significant characteristics for preferences

| Most preferred type           | Most likely characteristics - both groups combined                                                                                                                                                            | Most likely characteristics - mental health patients                                                                                                                                                                  | Most likely characteristics - general population sample                                                                                                                     |
|-------------------------------|---------------------------------------------------------------------------------------------------------------------------------------------------------------------------------------------------------------|-----------------------------------------------------------------------------------------------------------------------------------------------------------------------------------------------------------------------|-----------------------------------------------------------------------------------------------------------------------------------------------------------------------------|
| <b>Music therapy</b>          | <ul style="list-style-type: none"> <li>• Males</li> <li>• Mental health patients</li> <li>• Attended music therapy before</li> <li>• Not attended art therapy</li> <li>• Not attended dramatherapy</li> </ul> | <ul style="list-style-type: none"> <li>• Males</li> <li>• BAME background</li> <li>• Attended music therapy before</li> <li>• Not attended art therapy</li> </ul>                                                     | <ul style="list-style-type: none"> <li>• Males</li> <li>• Attended music therapy before</li> <li>• Not attended art therapy</li> <li>• Not attended dramatherapy</li> </ul> |
| <b>Dance-movement therapy</b> | <ul style="list-style-type: none"> <li>• Females</li> <li>• Not heard of arts therapies before</li> <li>• Attended dance-movement therapy before</li> <li>• Not attended art therapy</li> </ul>               | <ul style="list-style-type: none"> <li>• Attended dance-movement therapy before</li> <li>• Not attended art therapy</li> </ul>                                                                                        | <ul style="list-style-type: none"> <li>• Female</li> <li>• Attended music therapy before</li> <li>• Attended dance-movement therapy before</li> </ul>                       |
| <b>Art therapy</b>            | <ul style="list-style-type: none"> <li>• Females</li> <li>• General population sample</li> <li>• Attended art therapy before</li> </ul>                                                                       | <ul style="list-style-type: none"> <li>• Females</li> <li>• Attended art therapy before</li> </ul>                                                                                                                    | <ul style="list-style-type: none"> <li>• Female</li> <li>• Attended art therapy before</li> </ul>                                                                           |
| <b>Dramatherapy</b>           | <ul style="list-style-type: none"> <li>• Males</li> <li>• Attended dramatherapy before</li> </ul>                                                                                                             | <ul style="list-style-type: none"> <li>• Males</li> <li>• White British background</li> <li>• Not heard of arts therapies</li> <li>• Attended music therapy before</li> <li>• Attended dramatherapy before</li> </ul> | <ul style="list-style-type: none"> <li>• None</li> </ul>                                                                                                                    |

### Reasons for preferences

Participants were asked why they had chosen their most preferred arts modality with an open response box. These answers were grouped into seven main themes; enjoyment, expectations of helpfulness, feeling capable, impact on mood, creating something, social interaction and the unknown (see Table 4 for counts).



Table 4: Counts of themes

| Theme                       | Most like |       |
|-----------------------------|-----------|-------|
|                             | N         | %     |
| Enjoyment                   | 578       | 38.05 |
| Expectations of helpfulness | 294       | 19.35 |
| Feeling capable             | 228       | 15.01 |
| Impact on mood              | 197       | 12.97 |
| Creating something          | 67        | 4.41  |
| Social interaction          | 61        | 4.02  |
| The unknown                 | 34        | 2.24  |

These themes were also entered into a regression model to look for associations between the reasons participants gave for their preferences and their characteristics. The regression model with all categories was not a good fit because of low numbers in some of the categories. In order to create a good fit, the four categories which had the fewest responses were grouped together and named 'other'. In the bar charts, the results were kept in their original, wider, categories.

The regression model (Appendix F) for the reasons given by the full sample showed that gender ( $p=0.05$ ) (Figure 2), level of education ( $p<0.001$ ) (Figure 3), age group ( $p=0.004$ ) (Figure 4), interest in taking part ( $p=0.01$ ) (Figure 5) and most preferred modality ( $p<0.001$ ) (Figure 6) were significant factors. When the mental health group and the general population were analysed separately, their most preferred modality ( $p<0.001$ ) was the only variable significantly associated with the reason given for this.

## Themes

### *Enjoyment*

Enjoyment and pleasure were mentioned often. Participants sometimes related their enjoyment of the art form to previous experiences such as at school or using the art forms as hobbies. Many people said they had a personal interest in an art form and that is why they would choose it. They expected that using the art form would be fun.

*"I like to make music and have a studio at home"* (Ppt0045: Music therapy)

*"Done it before and enjoyed it, benefited from it"* (Ppt0303: Art therapy)

### *Expectations of helpfulness*

Participants often gave a reason related to how helpful they expected that arts modality to be for them. This was sometimes due to the therapeutic benefit they thought they may gain from using that art form, as well as being able to use the art form to express themselves.

1  
2  
3 *“Exercise and movement help with my depression”* (Ppt0270: Dance-movement therapy)

4  
5  
6 *“Because I know that when you draw/paint, you are in touch with a childlike part of yourself.*  
7 *Therefore I think it could be useful, particularly in conjunction with talking about the*  
8 *problem. Art taps into unconscious processes”* (Ppt0767: Art therapy)

#### 11 *Feeling capable*

12  
13  
14 Some people preferred an arts modality because they felt that they were good at it, possibly  
15 because of past experience or a natural talent. Others said they would feel more comfortable using  
16 an art form because they believed there was no need to be good at it.

17  
18  
19  
20 *“I think I’d make a good actor”* (Ppt0224: Dramatherapy)

21  
22 *“Because it’s something anyone can do with any skill level. No judgement, it’s what you feel*  
23 *and what drives you to put down on paper. For me it settles my head and evens me out.”*  
24  
25 (Ppt0620: Art therapy)

#### 26 27 28 *Impact on mood*

29  
30  
31 Participants spoke about how an art form may be relaxing for them or that it cheers them up. This  
32 was expected to be through different methods of engaging with the art form, including listening to  
33 calming music, the benefits of doing exercise, or just the joy of being creative.

34  
35  
36  
37 *“Because of the interaction, when you listen to music your mood improves as well. You get*  
38 *better. When you listen to different types of music your moods gets better all the time too.”*  
39  
40 (Ppt0295: Music therapy)

41  
42  
43 *“Dance would relax me and help to maintain fitness”* (Ppt1300: Dance-movement therapy)

#### 44 45 *Creating something*

46  
47  
48 The theme of creating something encapsulated when participants said that the creativity, or  
49 producing something, would draw them to a modality. This was most often mentioned in relation to  
50 art therapy.

51  
52  
53 *“I enjoy the quite methodical work that goes into producing a piece of artwork and having a*  
54 *visual representation to have and keep”* (Ppt1330: Art therapy)

55  
56  
57 *“I like the thought of being creative and making things.”* (Ppt1410: Art therapy)

#### 58 59 *Social interaction*

1  
2  
3 Some participants said that they would choose their preferred modality because it would give them  
4 a chance to be with others and socialise. It seemed that art therapy was considered a less 'sociable'  
5 modality, as each person works on their own piece of art; this was a positive thing for many people.  
6  
7

8  
9 *"I believe it would involve the greatest amount of independent working without interaction*  
10 *with others."* (Ppt0788: Art therapy)  
11

12  
13 *"I think because I'm expressive, I'm comfortable in front of other people and being able to be*  
14 *silly boosts your self-esteem and is good for my mental health"* (Ppt1206: Dramatherapy)  
15  
16

### 17 *The unknown*

18  
19 Participants gave 'not knowing' about a modality as a reason for why they might like to take part.  
20 For example, some said they would like to try it as it was something new, or that they would like to  
21 learn a new skill.  
22  
23

24  
25 *"Sounds relaxing and something that I have never done before and the other three are my*  
26 *hobbies already. Would like to get better at art."* (Ppt1124: Art therapy)  
27  
28

29  
30 *"Never learnt an instrument and would want to muck around within one"* (Ppt1130: Music  
31 therapy)  
32  
33

34 In summary of the bar charts, it seems that males are more likely to place value on enjoyment and  
35 feeling capable than females, whereas females are more likely to speak about expectations of  
36 helpfulness than males when giving reasons for their preferences. Those who were not university  
37 educated, and people over the age of 45 put more emphasis on enjoyment than others. Enjoyment  
38 and impact on mood were more commonly mentioned for music therapy than for the other  
39 modalities, whereas expectations of helpfulness seemed more relevant for people who chose dance-  
40 movement or dramatherapy. Feeling capable was a key consideration for people who chose  
41 dramatherapy as their preferred modality, and creating something was more important for those  
42 who chose art therapy than the other modalities.  
43  
44  
45  
46  
47  
48  
49

### 50 Discussion

51  
52 To our knowledge, this is the largest survey of the arts therapies ever undertaken. The results show  
53 who would be interested in group arts therapies, what they would want, and why. A relatively high  
54 proportion of people both in mental health services and in the general population would be  
55 interested in participating (around 60%). However, when looking at the proportion of those using  
56 mental health services who had accessed arts therapies, this number was much lower (42%).  
57  
58  
59  
60

1  
2  
3 Receiving a preferred psychosocial treatment is associated with lower dropout rates (12), and the  
4 results of this survey suggest that there is the potential for arts therapies to be more widely offered,  
5 to increase engagement with treatment. It is unknown how many Trusts in the UK provide an arts  
6 therapies service, but of the sites in this survey the number was 4 out of 13 (31%). This may not be  
7 representative of arts therapies provision across the UK. We would recommend that research is  
8 conducted to ascertain this information.  
9  
10  
11  
12

13  
14 The results indicate that preferences in the survey were heavily informed by past experiences of  
15 using that art form. The most consistent and clinically relevant predictors of preferences were  
16 previous experiences of the same type of arts therapy. A conceptual review of resource-oriented  
17 therapeutic models in psychiatry highlighted how utilising the experiences and knowledge of the  
18 patient, in particular to identify what has helped them in the past, is a key component of solution-  
19 focused therapy (39). This suggests that an understanding of patients' past experiences of the arts  
20 should form an integral part of the shared decision-making process.(12)  
21  
22  
23  
24  
25

26 Art and music therapy were the most preferred modalities overall. There are a number of potential  
27 explanations for this, other than them being truly more popular. Although we do not know actual  
28 provision of arts therapies in mental health services, far more people in the survey had heard of and  
29 attended art therapy and music therapy than the other two modalities. As demonstrated by the  
30 regression model, those who have attended a modality before are more likely to choose it as their  
31 preference; this held true for every modality and both participant groups. Therefore, the lower  
32 numbers of people choosing dance-movement and dramatherapy could be due to the lower  
33 availability of these modalities. It could also be argued that music and art are more 'mainstream' art  
34 forms, which most people use in their day to day lives and therefore feel more comfortable with.  
35  
36  
37  
38  
39  
40  
41

42 Another potential reason for this split is a misunderstanding of the implications of taking part in  
43 dance-movement and dramatherapy. Zajonc suggests that people are able to express preferences  
44 based on very limited information, by adhering to their past experiences and set of values (40) and  
45 many participants spoke about their past experiences of the arts, such as at school or as hobbies.  
46 Participants in this questionnaire were not informed about what the arts therapies involve, and the  
47 open responses highlighted some misconceptions. This underlines the need for clinicians to address  
48 concerns during informed decision making processes.  
49  
50  
51  
52  
53  
54

55 In line with proposed common active factors, this survey found that pleasure and enjoyment are  
56 important for arts therapies preferences (41). It has been suggested that people making non-  
57 consequential decisions will do so on the basis of mental pleasure, or to minimise mental  
58  
59  
60

1  
2  
3 displeasure (42). In the arts therapies, pleasure and playfulness may be more important than in  
4 other forms of therapy (2), as there is an emphasis on using creativity to explore different cognitive  
5 or emotional experiences (16,35). Fun and enjoyment are also mentioned as factors in qualitative  
6 studies of patient experiences of arts therapies (43,44).  
7  
8  
9

10 It was important to participants to consider how the art form might be helpful for them, such as  
11 being inherently therapeutic, or a way to express themselves. This is in line with literature on the  
12 construction of preferences; people consider the pros and cons of the options and how they may  
13 benefit from them (45). Expectations of how a therapy might be helpful also play a crucial role in  
14 engagement and process (13). Patients and therapists must believe that the therapy will help them  
15 in order to make positive change (17).  
16  
17  
18  
19  
20

21 Other reasons for preferences revolved around an impact on mood. In previous studies, changes in  
22 mood have been highlighted as key outcomes for people who attend the arts therapies (20,46–48)  
23 and this seemed particularly important for people who chose music therapy as their preference.  
24 Social interaction was also important consideration for participants in the survey (16). Being  
25 together in a group has been found to be a key mechanism of change for patients attending music  
26 therapy (34,49), therefore consideration of the group dynamics is pertinent.  
27  
28  
29  
30  
31

32 It is essential to remember that any decisions about engagement with the arts therapies should be  
33 made in collaboration with a healthcare professional, within the context of a shared decision-making  
34 approach (50,51). The reasons which participants gave in this study point towards the aspects of arts  
35 therapies treatment which could influence their preferences. Although past experiences are a key  
36 consideration, it may be appropriate to encourage a patient to try something new, depending on  
37 their situation. The healthcare professional should be prepared to state the aims and goals of the  
38 arts therapies so that patients have more information than only their own past experiences. Decision  
39 aids, including taster sessions, for the arts therapies could be helpful in supporting patients to make  
40 an informed choice (11).  
41  
42  
43  
44  
45  
46  
47

#### 48 Strengths and limitations

49

50  
51 The simplicity of the survey meant it was popular with NHS sites and online access meant  
52 recruitment was able to continue during the COVID-19 pandemic. As the study was the first of its  
53 kind, the approach was exploratory and a sample size calculation was not deemed appropriate. The  
54 sampling technique may have led to some bias, and there were some significant difference between  
55 participant groups (mental health patients and general population). Researchers asked people in  
56 their own networks for the general population sample. This is likely to be the cause of the high levels  
57  
58  
59  
60

1  
2  
3 of education seen in the general population sample and potentially higher numbers of female  
4 participants, as many were employed by the mental health service involved in the study (27% of  
5 general population participants). It was necessary to recruit participants in this way for pragmatic  
6 reasons, however, ideally the general population sample would be more representative. We also did  
7 not ask the general population sample whether they were mental health patients, so the groups may  
8 not have been mutually exclusive. In multivariable analysis, it is recommended that the sample size  
9 should be at least 10 times the number of variables considered (52); this was the case with our  
10 sample, suggesting that the associations are reliable.

11  
12  
13  
14  
15  
16  
17  
18  
19  
20  
21  
22  
23  
24  
25  
26  
27  
28  
29  
30  
31  
32  
33  
34  
35  
36  
37  
38  
39  
40  
41  
42  
43  
44  
45  
46  
47  
48  
49  
50  
51  
52  
53  
54  
55  
56  
57  
58  
59  
60  
Reasons for liking something can be difficult to verbalise (40) and participants in the current study  
sometimes gave limited responses to the open questions. This could have been influenced by the  
short nature of the survey and the environment in which it was being answered, e.g. in a waiting  
room or shopping centre, or over the phone. A more in-depth understanding of the choices that  
participants made could be ascertained through individual interviews. If this research were to be  
conducted, the themes drawn out from the open questions in this study could provide a framework  
for topic guides. This survey focused on group arts therapies, whereas the results may have been  
different for individual therapy. There could be scope for linking these reasons for preferences to  
personality characteristics such as openness and extraversion (53), however this was not within the  
remit of this study. In hindsight, it would have been interesting to know whether participants' past  
experiences of the arts therapies were in groups or individually, however this question was not  
included in the survey because it did not seem relevant to the research question at the time.

Given the large number of tests conducted in this study, it would be expected that 5% of the  
significant results were due to chance, as they were not corrected for multiple testing. It is also  
important to consider the difference between statistical significance and clinical relevance. Many of  
the associations found in this study will not highlight clinically relevant findings. To account for this,  
significant associations have not been given undue weight and the most relevant to clinical contexts  
have been explored further.

Zaller suggested that survey responses seem to be random and not necessarily linked to participants'  
preferences (54). In the current study, participants were 'forced' to choose one modality as their  
preference. There was no option to say 'none' or 'all'. This may have created an unrealistic  
representation of true preferences. Participants were aware that there were no consequences to  
their preferences; they would not have to participate in the groups. They were also not given any  
information about the arts therapies, other than one sentence embedded in the survey. If someone  
was expressing a preference as part of their treatment pathway, they would be given more

1  
2  
3 information (11). They would also be given more time to think about their decision and discuss with  
4 a mental health professional as part of a shared decision-making process (55). Therefore, the  
5 responses in this survey may not translate into actual behaviour. Future research should focus on  
6 'real life' preferences of those who are taking part in the arts therapies and whether preferences  
7 and expectations are associated with engagement.  
8  
9

### 10 11 12 Conclusion

13  
14  
15 This is the first study to investigate who would be interested in taking part in group arts therapies  
16 and what their preferences would be. Two thirds of participants said they would be interested in  
17 participating. Relevant characteristics for interest and preferences were varied, but previous  
18 experience of the arts therapies was consistently associated with a preference for the same  
19 modality. The findings may justify the wide provision of arts therapies and the offer of more than  
20 one modality to interested patients. They also highlight key topics to consider when supporting  
21 people to make informed decisions about engaging with the arts therapies as part of a shared  
22 decision-making process.  
23  
24  
25  
26  
27

28  
29 We would recommend that further research is undertaken to ascertain current arts therapies  
30 provision in mental health services in the UK, as well as a more in-depth understanding of the impact  
31 of preferences on arts therapies engagement in both research and clinical settings.  
32  
33

### 34 35 Contributorship statement

36  
37 The study was planned and designed by Emma Millard, Catherine Carr and Stefan Priebe. Data  
38 collection was conducted by Emma Millard and researchers at each NHS site. Data preparation and  
39 analysis was undertaken by Emma Millard, Emma Medicott and Jessica Cardona. Write up and  
40 editing was undertaken by all authors, with Emma Millard taking the lead.  
41  
42  
43

### 44 45 Funding statement

46  
47 This work was funded by East London NHS Foundation Trust as part of a PhD studentship.  
48  
49

### 50 51 Competing interests

52  
53 None  
54

### 55 56 Acknowledgements

57  
58 With thanks to the ERA Study Lived Experience Advisory Panel for their advice, and all NHS Trusts  
59 involved: Barnet, Enfield and Haringey, Camden and Islington, Cornwall Partnership, Devon  
60



Partnership, ELFT, Lancashire Care, Mersey Care, NELFT, North West Boroughs, Oxford Health, Somerset Partnership, Southern Health, and West London.

#### Exclusive licence

I, the Submitting Author has the right to grant and does grant on behalf of all authors of the Work (as defined in the below author licence), an exclusive licence and/or a non-exclusive licence for contributions from authors who are: i) UK Crown employees; ii) where BMJ has agreed a CC-BY licence shall apply, and/or iii) in accordance with the terms applicable for US Federal Government officers or employees acting as part of their official duties; on a worldwide, perpetual, irrevocable, royalty-free basis to BMJ Publishing Group Ltd ("BMJ") its licensees and where the relevant Journal is co-owned by BMJ to the co-owners of the Journal, to publish the Work in BMJ Open and any other BMJ products and to exploit all rights, as set out in our licence.

#### Data sharing

Unpublished, anonymised data would be made available upon reasonable request.

#### Ethics statement

This study was given ethical approval by the South Central Oxford C Research Ethics Committee (18/SC/0701).

#### References

1. Karkou V, Sanderson P. Arts Therapies: A Research-based Map of the Field. Edinburgh: Elsevier; 2006.
2. Cattanach A. Process in the Arts Therapies. London: Jessica Kingsley; 1999.
3. Jones P. The Arts Therapies: A Revolution in Healthcare. 2nd ed. Oxon: Routledge; 2021.
4. Odell-Miller H, Hughes P, Westacott M. An investigation into the effectiveness of the arts therapies for adults with continuing mental health problems. *Psychotherapy Research*. 2006;16(1):122–39.
5. Jones P. The Arts Therapies: A Revolution in Healthcare. 2nd ed. Oxon: Routledge; 2020.
6. Davies A, Richards E, Barwick N. Group Music Therapy: A group analytic approach. London: Routledge; 2015.
7. Foulkes SH, Pines M. Selected Papers: Psychoanalysis and Group Analysis. London: H. Karnac (Books) Ltd; 1990.
8. Bion WR. Experiences in groups. *Human Relations*. 1948;1(3):314–20.



- 1
  - 2
  - 3
  - 4
  - 5
  - 6
  - 7
  - 8
  - 9
  - 10
  - 11
  - 12
  - 13
  - 14
  - 15
  - 16
  - 17
  - 18
  - 19
  - 20
  - 21
  - 22
  - 23
  - 24
  - 25
  - 26
  - 27
  - 28
  - 29
  - 30
  - 31
  - 32
  - 33
  - 34
  - 35
  - 36
  - 37
  - 38
  - 39
  - 40
  - 41
  - 42
  - 43
  - 44
  - 45
  - 46
  - 47
  - 48
  - 49
  - 50
  - 51
  - 52
  - 53
  - 54
  - 55
  - 56
  - 57
  - 58
  - 59
  - 60
9. Carr C, Feldtkeller B, French J, Huet V, Karkou V, Priebe S. What makes us the same? What makes us different? Development of a shared model and manual of group therapy practice across art therapy, dance movement therapy and music therapy within community mental health care. *The Arts in Psychotherapy*. Elsevier Ltd; 2020. 101747.
10. Jones P. *The Arts Therapies: A Revolution in Healthcare*. 2nd ed. Oxon: Routledge; 2020.
11. Millard E, Hounsell L, Fernandes J, Jakku M, Boast K, Church O, et al. How do you know what you want? Service user views on decision aids for the arts therapies. *The Arts in Psychotherapy* [Internet]. 2021;73(January):101757. Available from: <https://doi.org/10.1016/j.aip.2021.101757>
12. Windle E, Tee H, Sabitova A, Jovanovic N, Priebe S, Carr C. Association of Patient Treatment Preference With Dropout and Clinical Outcomes in Adult Psychosocial Mental Health Interventions A Systematic Review and Meta-analysis. *JAMA Psychiatry*. 2019;1–9.
13. Arnkoff DB, Glass CR, Shapiro SJ, Arnkoff DB, Shapiro SJ, Glass CR, et al. Expectations and Preferences. In: Norcross JC, editor. *Psychotherapy: Theory, Research, Practice, Training* [Internet]. Oxford University Press; 2002. p. 335–56. Available from: <http://psycnet.apa.org/psycinfo/2003-02805-018%5Cnhttp://doi.apa.org/getdoi.cfm?doi=10.1037/0033-3204.38.4.455>
14. Swift JK, Callahan JL, Cooper M, Parkin SR. The impact of accommodating client preference in psychotherapy: A meta-analysis. *Journal of Clinical Psychology* [Internet]. 2018;74(11):1924–37. Available from: <http://doi.wiley.com/10.1002/jclp.22680>
15. Hogan S. *Healing Arts: The History of Art Therapy*. Philadelphia: Jessica Kingsley; 2001.
16. Carr C, Feldtkeller B, French J, Huet V, Karkou V, Priebe S. What makes us the same? What makes us different? Development of a shared model and manual of group therapy practice across art therapy, dance movement therapy and music therapy within community mental health care. *The Arts in Psychotherapy*. Elsevier Ltd; 2020. 101747.
17. Wampold B, Imel ZE. *The great psychotherapy debate*. 2nd ed. New York: Routledge; 2015.
18. Priebe S, Conneely M, McCabe R, Bird V. What can clinicians do to improve outcomes across psychiatric treatments: a conceptual review of non-specific components. *Epidemiology and Psychiatric Sciences*. 2019;1–8.
19. Baker FA, Metcalf O, Varker T, O'Donnell M. A systematic review of the efficacy of creative arts therapies in the treatment of adults with PTSD. *Psychological Trauma: Theory, Research, Practice, and Policy*. 2018;10(6):643–51.
20. Aalbers S, Fusar-Poli L, Freeman RE, Spreen M, Ket JC, Vink AC, et al. *Music Therapy for Depression*. Cochrane Database of Systematic Reviews. 2017;
21. Geretsegger M, Ka M, Xj C, To H, Gold C. Music therapy for people with schizophrenia and schizophrenia-like disorders. 2017;(5).

- 1
- 2
- 3 22. Deshmukh S, Holmes J, Cardno A. Art therapy for people with dementia. *Cochrane Database of Systematic Reviews*. 2018;(9).
- 4
- 5
- 6 23. Ruddy R, Milnes D. Art therapy for schizophrenia or schizophrenia-like illnesses. 2005;(4):4–6.
- 7
- 8 24. Meekums B, Karkou V, Ea N, Meekums B, Karkou V, Nelson EA. Dance movement therapy for depression. 2016;(2).
- 9
- 10 25. Ren J, Xia J. Dance therapy for schizophrenia. *Cochrane Database of Systematic Reviews*. 2013;(10):10–2.
- 11
- 12 26. Karkou V, Meekums B. Dance movement therapy for dementia. *Cochrane Database of Systematic Reviews*. 2017;2017(2).
- 13
- 14 27. Ruddy R, Dent-brown K. Drama therapy for schizophrenia or schizophrenia-like illnesses. 2007;(1):1–3.
- 15
- 16 28. Crawford MJ, Gold C, Odell-Miller H, Thana L, Faber S, Assmus J, et al. International multicentre randomised controlled trial of improvisational music therapy for children with autism spectrum disorder: TIME-A study. *Health Technology Assessment*. 2017;21(59):1–66.
- 17
- 18 29. Priebe S, Savill M, Wykes T, Bentall R, Lauber C, Reininghaus U, et al. Clinical effectiveness and cost-effectiveness of body psychotherapy in the treatment of negative symptoms of schizophrenia: A multicentre randomised controlled trial. *Health Technology Assessment*. 2016;20(11):1–100.
- 19
- 20 30. Grocke D, Bloch S, Castle D. The Effect of Group Music Therapy on Quality of Life for Participants Living with a Severe and Enduring Mental Illness. *Journal of Music Therapy* [Internet]. 2009;46(2):90–104. Available from: <https://academic.oup.com/jmt/article-lookup/doi/10.1093/jmt/46.2.90>
- 21
- 22 31. Coulter A, Ellins J. Effectiveness of strategies for informing, educating, and involving patients. *British Medical Journal*. 2007;335(7609):24–7.
- 23
- 24 32. Heaney CJ. Evaluation of music therapy and other treatment modalities by adult psychiatric inpatients. *Journal of music therapy*. 1992;29(2):70–86.
- 25
- 26 33. Silverman MJ. Perceptions of music therapy interventions from inpatients with severe mental illness: A mixed-methods approach. *Arts in Psychotherapy*. 2010;37(3):264–8.
- 27
- 28 34. Solli HP, Rolvsjord R, Borg M. Toward understanding music therapy as a recovery-oriented practice within mental health care: A meta-synthesis of service users' experiences. *Journal of Music Therapy*. 2013;50(4):244–73.
- 29
- 30 35. Haeyen S, Chakhssi F, van Hooren S. Benefits of Art Therapy in People Diagnosed With Personality Disorders: A Quantitative Survey. *Frontiers in Psychology*. 2020;11(April):1–8.
- 31
- 32 36. Kelley K, Clark B, Brown V, Sitzia J. Good practice in the conduct and reporting of survey research. *International Journal for Quality in Health Care*. 2003;15(3):261–6.
- 33
- 34
- 35
- 36
- 37
- 38
- 39
- 40
- 41
- 42
- 43
- 44
- 45
- 46
- 47
- 48
- 49
- 50
- 51
- 52
- 53
- 54
- 55
- 56
- 57
- 58
- 59
- 60

- 1
- 2
- 3 37. StataCorp. Stata Statistical Software: Release 15. College Station, TX: StataCorp LLC; 2017.
- 4
- 5 38. QSR International Pty Ltd. NVivo qualitative data analysis software. Version 12. 2018.
- 6
- 7 39. Priebe S, Omer S, Giacco D, Slade M. Resource-oriented therapeutic models in psychiatry:  
8 Conceptual review. *British Journal of Psychiatry*. 2014;204(4):256–61.
- 9
- 10 40. Zajonc R. Feeling and Thinking Preferences Need No Inference. *American Psychologist*.  
11 1980;35(2):151–75.
- 12
- 13 41. Koch SC. Arts and health: Active factors and a theory framework of embodied aesthetics. *Arts  
14 in Psychotherapy*. 2017;54:85–91.
- 15
- 16 42. Cabanac M, Guillaume J, Balasko M, Fleury A. Pleasure in decision-making situations.  
17 2002;15:1–15.
- 18
- 19 43. Windle E, Hickling LM, Jayacodi S, Carr C. The Experiences of Patients in the Synchrony Group  
20 Music Therapy Trial for Long-term Depression. *The Arts in Psychotherapy* [Internet]. 2019;  
21 Available from: <https://doi.org/10.1016/j.aip.2019.101580>
- 22
- 23 44. Brady C, Moss H, Kelly BD. A fuller picture : evaluating an art therapy programme in a  
24 multidisciplinary mental health service. 2017;30–4.
- 25
- 26 45. Slovic P. The construction of preference. *American Psychologist*. 1995;
- 27
- 28 46. De Petrillo L, Winner E. Does art improve mood? a test of a key assumption underlying art  
29 therapy. *Art Therapy*. 2005;22(4):205–12.
- 30
- 31 47. McKinney CH, Honig TJ. Health outcomes of a series of bonny method of guided imagery and  
32 music sessions: A systematic review. *Journal of Music Therapy*. 2017;54(1):1–34.
- 33
- 34 48. Bell CE, Robbins SJ. Effect of Art Production on Negative Mood: A Randomized, Controlled  
35 Trial. *Art Therapy*. 2007;24(2):71–5.
- 36
- 37 49. Windle E, Hickling LM, Jayacodi S, Carr C. The Experiences of Patients in the Synchrony Group  
38 Music Therapy Trial for Long-term Depression. *The Arts in Psychotherapy*. 2019;
- 39
- 40 50. Edwards A, Elwyn G. Shared decision-making in health care: Achieving evidence-based  
41 patient choice [Internet]. Oxford: Oxford University Press; 2009. Available from:  
42 [https://ebookcentral-proquest-com.ezproxy.library.qmul.ac.uk/lib/gmul-  
43 ebooks/reader.action?docID=975640#](https://ebookcentral-proquest-com.ezproxy.library.qmul.ac.uk/lib/gmul-ebooks/reader.action?docID=975640#)
- 44
- 45 51. Slade M. Implementing shared decision making in routine mental health care. *World  
46 Psychiatry*. 2017;16(2):146–53.
- 47
- 48 52. Sekaran U, Bougie R. *Research Methods for Business*. Chichester: John Wiley & Sons Ltd;  
49 2016.
- 50
- 51
- 52
- 53
- 54
- 55
- 56
- 57
- 58
- 59
- 60

- 1  
2  
3 53. Kaplan SC, Levinson CA, Rodebaugh TL, Menatti A, Weeks JW. Social Anxiety and the Big Five  
4 Personality Traits: The Interactive Relationship of Trust and Openness. Vol. 44, Cognitive  
5 Behaviour Therapy. Taylor & Francis; 2015. p. 212–22.  
6  
7  
8 54. Zaller J, Feldman S. A Simple Theory of the Survey Response : Answering Questions versus  
9 Revealing Preferences. American Journal of Political Science. 1992;36(3):579–616.  
10  
11 55. Duncan E, Best C, Hagen S, Duncan E, Best C, Hagen S. Shared decision making interventions  
12 for people with mental health conditions. Cochrane Database of Systematic Reviews. 2010;  
13  
14  
15  
16  
17  
18

19 Figure 1: Most preferred arts therapies modality divided by participant group

20  
21 Figure 2: Bar chart of association between reason given and gender

22  
23 Figure 3: Bar chart of association between reason given and level of education

24  
25 Figure 4: Bar chart of association between reason given and age group

26  
27 Figure 5: Bar chart of association between reason given and interest in participating in group arts  
28 therapies

29  
30 Figure 6: Bar chart of association between reason given and most preferred modality  
31  
32  
33  
34  
35  
36  
37  
38  
39  
40  
41  
42  
43  
44  
45  
46  
47  
48  
49  
50  
51  
52  
53  
54  
55  
56  
57  
58  
59  
60

1  
2  
3  
4  
5  
6  
7  
8  
9  
10  
11  
12  
13  
14  
15  
16  
17  
18  
19  
20  
21  
22  
23  
24  
25  
26  
27  
28  
29  
30  
31  
32  
33  
34  
35  
36  
37  
38  
39  
40  
41  
42  
43  
44  
45  
46  
47  
48  
49  
50  
51  
52  
53  
54  
55  
56  
57  
58  
59  
60

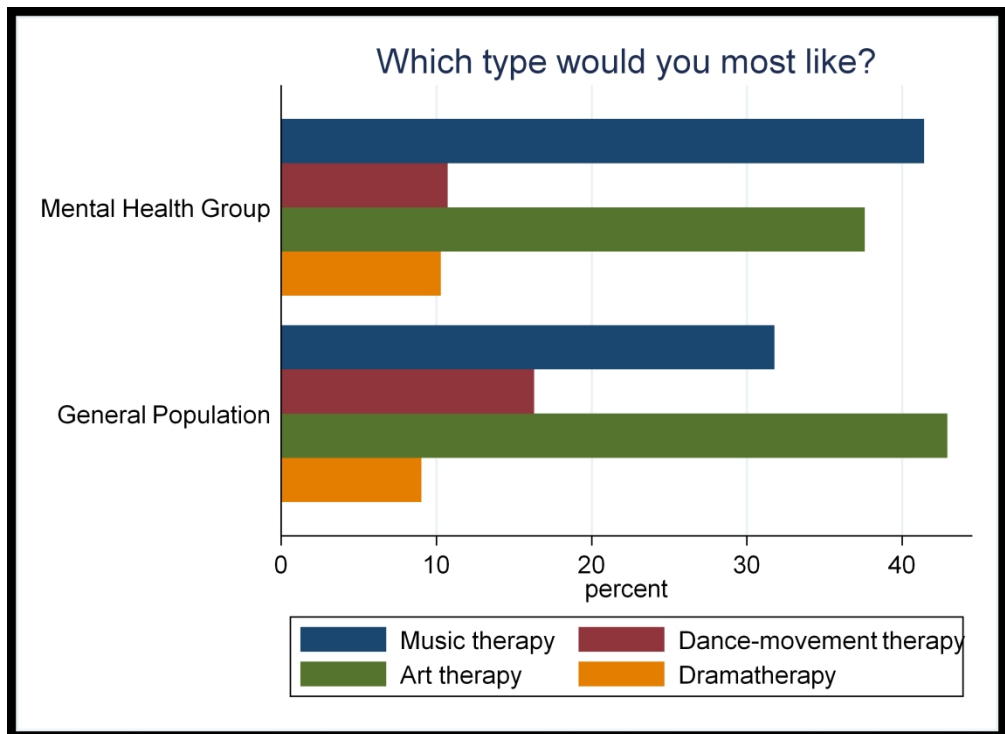

Figure 1: Most preferred arts therapies modality divided by participant group

1812x1328mm (47 x 47 DPI)

1  
2  
3  
4  
5  
6  
7  
8  
9  
10  
11  
12  
13  
14  
15  
16  
17  
18  
19  
20  
21  
22  
23  
24  
25  
26  
27  
28  
29  
30  
31  
32  
33  
34  
35  
36  
37  
38  
39  
40  
41  
42  
43  
44  
45  
46  
47  
48  
49  
50  
51  
52  
53  
54  
55  
56  
57  
58  
59  
60

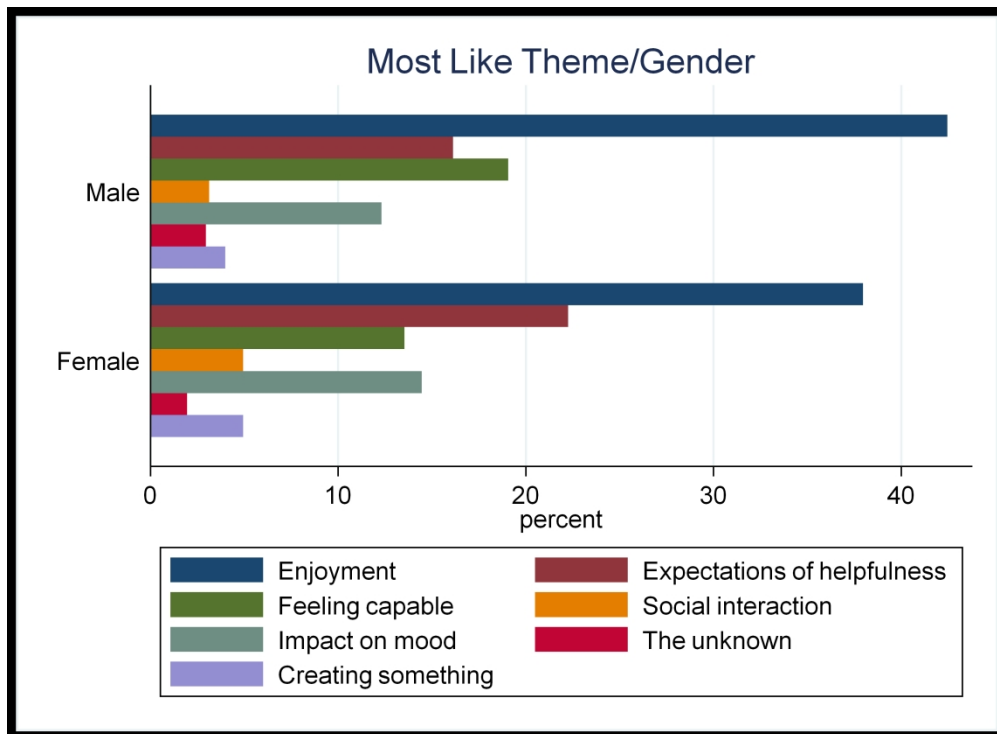

Figure 2: Bar chart of association between reason given and gender

1812x1328mm (47 x 47 DPI)

1  
2  
3  
4  
5  
6  
7  
8  
9  
10  
11  
12  
13  
14  
15  
16  
17  
18  
19  
20  
21  
22  
23  
24  
25  
26  
27  
28  
29  
30  
31  
32  
33  
34  
35  
36  
37  
38  
39  
40  
41  
42  
43  
44  
45  
46  
47  
48  
49  
50  
51  
52  
53  
54  
55  
56  
57  
58  
59  
60

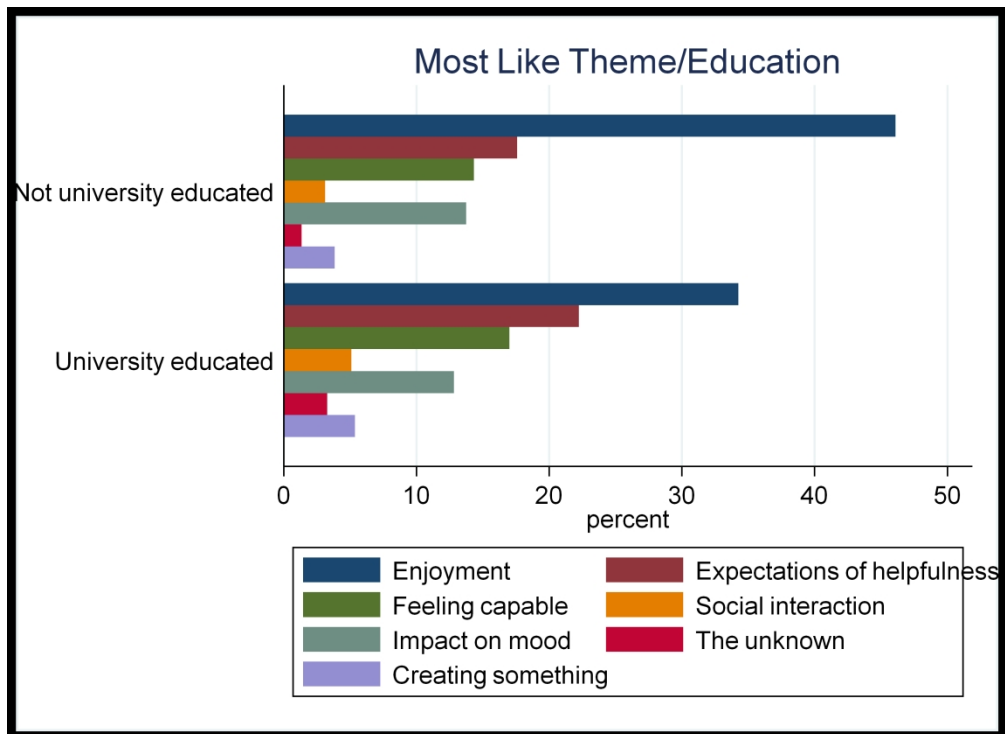

Figure 3: Bar chart of association between reason given and level of education

1812x1328mm (47 x 47 DPI)

1  
2  
3  
4  
5  
6  
7  
8  
9  
10  
11  
12  
13  
14  
15  
16  
17  
18  
19  
20  
21  
22  
23  
24  
25  
26  
27  
28  
29  
30  
31  
32  
33  
34  
35  
36  
37  
38  
39  
40  
41  
42  
43  
44  
45  
46  
47  
48  
49  
50  
51  
52  
53  
54  
55  
56  
57  
58  
59  
60

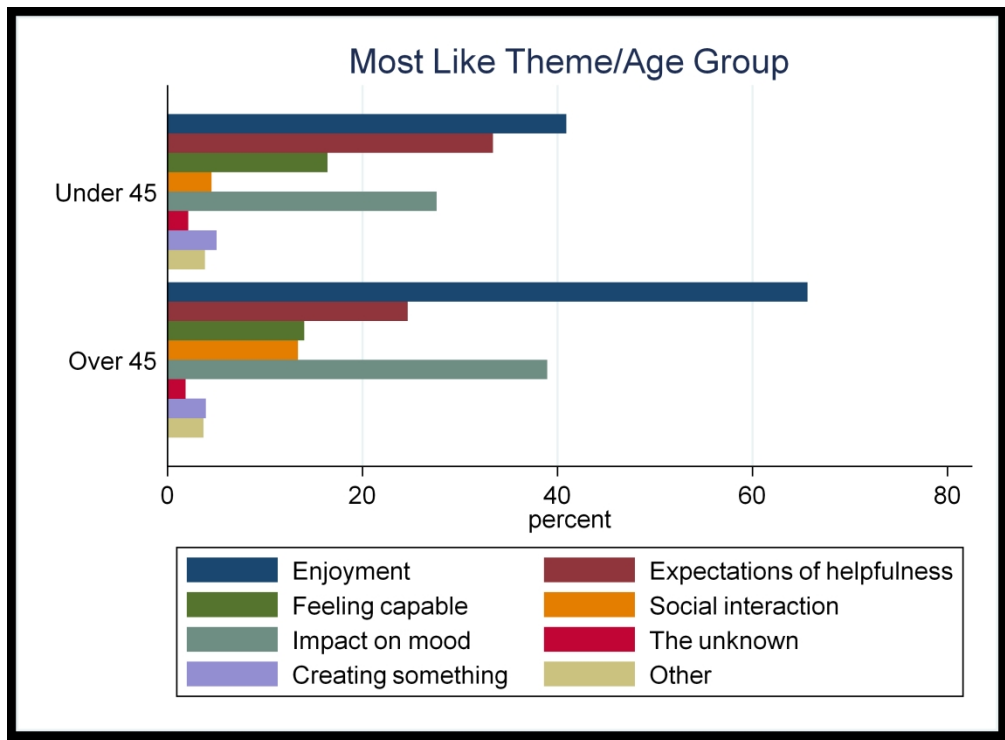

Figure 4: Bar chart of association between reason given and age group

1812x1328mm (47 x 47 DPI)



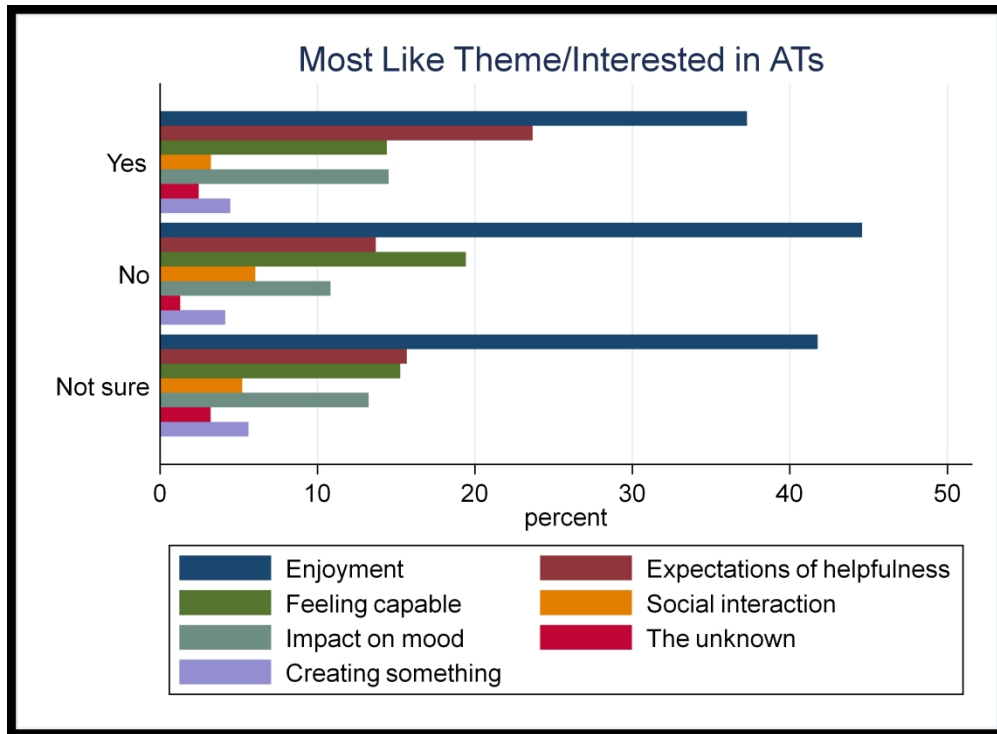

Figure 5: Bar chart of association between reason given and interest in participating in group arts therapies

1812x1328mm (47 x 47 DPI)

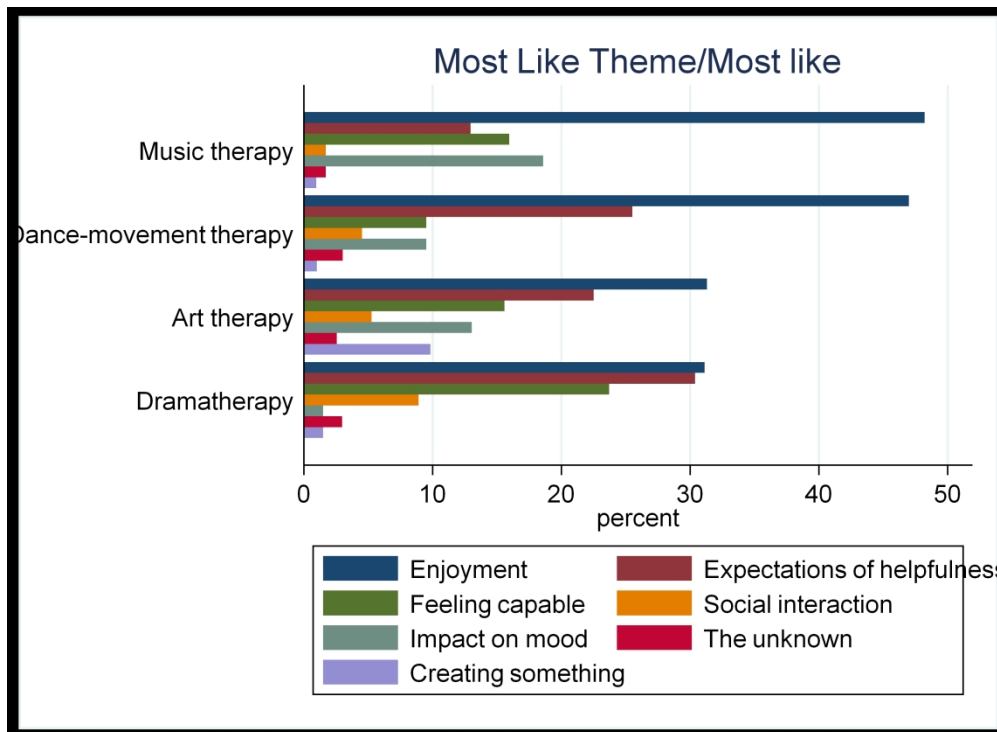

Figure 6: Bar chart of association between reason given and most preferred modality

1817x1328mm (47 x 47 DPI)

## Appendix A: Mental health patients survey questions

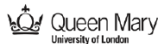

### Preferences for the Arts Therapies - MH Group Ex

#### Page 1: Information Sheet

##### Preferences for the Arts Therapies

We would like to invite you to participate in a study. Before you decide to take part in this study you need to understand why the research is being done and what it would involve. Please take time to read the following information carefully and feel free to email the researcher to ask questions if you wish.

##### What is the purpose of the study?

This study has been designed to collect information about what people know about the arts therapies and which modality they would choose if they were seeking treatment.

##### What will the study involve?

Once you have read this information sheet, you will be asked to give your consent to take part in the study. You will also be asked to give consent for the researcher to access your medical records. Your diagnosis and length of time using mental health services will be recorded and stored separately to your survey answers – linked by a unique ID number.

It will take around 5-10 minutes to complete the questionnaire.

If you take part, there will be the opportunity to enter a prize draw to win a £50 shopping voucher. To do this you will need to provide your name and contact number. This information will be stored separately to your questionnaire responses.

##### Do I have to take part?

1 / 18

any time.

##### Who is sponsoring and funding the research?

Queen Mary University of London is sponsoring this research and it is funded by East London NHS Foundation Trust.

##### Who has reviewed this study?

The Research Ethics Committee of South Central - Oxford C Research Ethics Committee have approved this study (REC.18/SC/0701).

##### What will happen with the results of the study?

The results of the study will be submitted for publication in a peer-reviewed journal, and be a part of the researcher's PhD thesis.

##### What if there is a problem?

If you have any concerns about this study, you should speak to the researcher who is completing the survey with you.

Or you can speak to the Chief Investigator, Emma Windle, who can be reached at [e.h.windle@qmul.ac.uk](mailto:e.h.windle@qmul.ac.uk).

If you wish to complain formally, you can do this by contacting the Patient Advisory Liaison Service (PALS):

Queen Mary University of London has agreed that if you are harmed as a result of your participation in the study, you will be compensated, provided that, on the balance of probabilities, an injury was caused as a direct result of the intervention or procedures you received during the course of the study. These special compensation arrangements apply where an injury is caused to you that would not have occurred if you were not in the trial. These arrangements do not affect your right to pursue a claim through legal action.

3 / 18

You do not have to take part in this study. You are free to decide not to take part and you can change your mind at any point whilst completing the survey. After submitting your answers you can no longer withdraw.

##### What happens to my personal information?

Queen Mary University of London is the sponsor for this study based in the United Kingdom. We will be using information from you in order to undertake this study and will act as the data controller for this study. This means that we are responsible for looking after your information and using it properly. Identifiable information will be kept within your NHS Trust and shared without identifiers with QMUL.

Your rights to access, change or move your information are limited, as we need to manage your information in specific ways in order for the research to be reliable and accurate. If you withdraw from the study, we will keep the information about you that we have already obtained. To safeguard your rights, we will use the minimum personally-identifiable information possible.

You can find out more about how we use your information at <http://www.arcs.qmul.ac.uk/media/arcs/policyzone/Privacy-Notice-for-Research-Participants.pdf>

Your NHS Trust will collect information from you for this research study in accordance with their instructions.

Your Trust will keep your name and contact details confidential and will not pass this information to Queen Mary University of London. The Trust will use this information as needed, to contact you about the research study and to oversee the quality of the study. Certain individuals from Queen Mary University of London and regulatory organisations may look at your research records to check the accuracy of the research study. Queen Mary University of London will only receive information without any identifying information. The people who analyse the information will not be able to identify you and will not be able to find out your name or contact details.

##### What are the possible benefits of taking part?

There is no immediate benefit to taking part in this research. You will be helping us to gain an understanding of people's attitudes towards the arts therapies.

##### What are the possible disadvantages of taking part?

This is a brief survey and we believe that it is safe for you to take part. However, if you feel uncomfortable or decide you do not want to participate, you can stop the survey at

2 / 18

#### Page 2: Consent Form

I confirm that I have read and understood the information sheet for the 'Preferences about the Arts Therapies'. I have been given the opportunity to ask questions.

I understand that the study involves completing a short questionnaire about my perspectives of the arts therapies.

I understand that my participation is voluntary and that I can withdraw at any time by closing the browser. Once I have submitted my answers I can no longer withdraw from the study.

I agree that the research team can access my clinical records to find out more about my mental health diagnosis and treatment history.

I understand that all information will be kept confidential and any personal details will be anonymised. I understand that confidentiality may need to be broken if there is a concern for risk to other people or to myself.

I agree to take part in the above study. \* Required

Yes  
 No

I agree for the research team to access my clinical records to find out more about my mental health diagnosis and treatment history. \* Required

Yes  
 No

Date \* Required

4 / 18

Dates need to be in the format 'DD/MM/YYYY', for example 27/03/1960.

(dd/mm/yyyy)

Page 3: To be completed by the researcher

Name of site

Patient ID

5 / 18

6 / 18

Page 4

What is your gender?

Male  
 Female  
 Other  
 Prefer not to say

7 / 18

Page 5

What is your ethnic group? Choose one option that best describes your ethnic group or background

White - English/Welsh/Scottish/Northern Irish/British  
 White - Irish  
 White - Gypsy or Irish Traveller  
 White - Any other White background, please describe  
 Mixed/multiple ethnic groups - White and Black Caribbean  
 Mixed/multiple ethnic groups - White and Black African  
 Mixed/multiple ethnic groups - White and Asian  
 Mixed/multiple ethnic groups - Any other Mixed/Multiple ethnic background, please describe  
 Asian/Asian British - Indian  
 Asian/Asian British - Pakistani  
 Asian/Asian British - Bangladeshi  
 Asian/Asian British - Chinese  
 Asian/Asian British - Any other Asian background, please describe  
 Black/ African/Caribbean/Black British - African  
 Black/ African/Caribbean/Black British - Caribbean  
 Black/ African/Caribbean/Black British - Any other Black/African/Caribbean background, please describe  
 Other ethnic group - Arab  
 Other ethnic group - Any other ethnic group, please describe  
 Prefer not to say

If you selected Other, please specify:

8 / 18

1  
2  
3  
4  
5  
6  
7  
8  
9  
10  
11  
12  
13  
14  
15  
16  
17  
18  
19  
20  
21  
22  
23  
24  
25  
26  
27  
28  
29  
30  
31  
32  
33  
34  
35  
36  
37  
38  
39  
40  
41  
42  
43  
44  
45  
46  
47  
48  
49  
50  
51  
52  
53  
54  
55  
56  
57  
58  
59  
60

Page 6

What level of education have you completed?

- Primary school (up to age 11)
- Secondary school (up to age 16)
- College (up to age 18)
- University (18+)
- Prefer not to say

9 / 18

Page 7

Have you ever received talking therapy (e.g. cognitive behavioural therapy, psychotherapy, counselling)?

- Yes
- No
- Prefer not to say

Was this individual or group therapy?

- Individual
- Group
- Both
- Prefer not to say

10 / 18

Page 8

Many people use different art forms therapeutically to support their mental wellbeing. The 'arts therapies' involve the use of creative art forms as a mode of expression and communication, supported by an accredited arts therapist. There are four main types of arts therapies; music therapy, dance-movement therapy, art therapy and dramatherapy.

11 / 18

Page 9

Would you be interested in taking part in group arts therapies?

- Yes
- No
- Not sure

12 / 18

Page 10

Please tick the relevant boxes (can be more than one):  
Please don't select more than 5 answer(s) per row.  
Please select at least 2 answer(s).

|                                                              | Music therapy            | Dance-movement therapy   | Art therapy              | Dramatherapy             | None                     | Other                    |
|--------------------------------------------------------------|--------------------------|--------------------------|--------------------------|--------------------------|--------------------------|--------------------------|
| Which arts therapies have you heard of before?               | <input type="checkbox"/> |
| Have you ever attended any of these types of arts therapies? | <input type="checkbox"/> |

If other, please give details:

13 / 18

Page 11

Please choose **one** modality for each of these questions:  
Please don't select more than 1 answer(s) per row.  
Please select at least 2 answer(s).

|                                                  | Music therapy            | Dance-movement therapy   | Art therapy              | Dramatherapy             |
|--------------------------------------------------|--------------------------|--------------------------|--------------------------|--------------------------|
| Which type would you MOST like to take part in?  | <input type="checkbox"/> | <input type="checkbox"/> | <input type="checkbox"/> | <input type="checkbox"/> |
| Which type would you LEAST like to take part in? | <input type="checkbox"/> | <input type="checkbox"/> | <input type="checkbox"/> | <input type="checkbox"/> |

14 / 18

Page 12

Why would you most like to take part in [CHOOSE\_1]?

Why would you least like to take part in [CHOOSE\_2]?

15 / 18

Page 13: Thank you for taking part in this survey

Would you like to be entered into a prize draw to win £50 of shopping vouchers?

- Yes
- No

If yes, the researcher will record your name and contact details.

16 / 18

Page 14

Would you like to be contacted about future opportunities to be involved in research?

- Yes
- No

If yes, the researcher will record your contact details.

Page 15

Thank you for taking the time to complete this survey.

If you have any questions or concerns, please email Emma Windle:  
e.h.windle@qmul.ac.uk.

If you would like to know more about the arts therapies, please follow this link:

<https://www.youtube.com/watch?v=GMR5vV1PJM0>

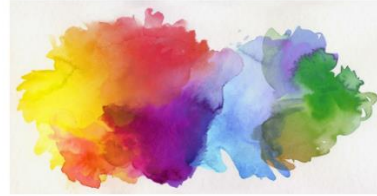

17 / 18

18 / 18

Peer review only

## Appendix B: General population survey questions

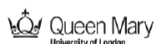

### Preferences for the Arts Therapies - Pop group Ex

#### Page 1: Information Sheet

##### Preferences for the Arts Therapies

We would like to invite you to participate in a study. Before you decide to take part in this study you need to understand why the research is being done and what it would involve. Please take time to read the following information carefully and feel free to email the researcher to ask questions if you wish.

##### What is the purpose of the study?

This study has been designed to collect information about what people know about the arts therapies and which modality they would choose if they were seeking treatment.

##### What will the study involve?

Once you have read this information sheet, you will be asked to give your consent to take part in the study. It will take around 5-10 minutes to complete the questionnaire.

If you take part, there will be the opportunity to enter a prize draw to win a £50 shopping voucher. To do this you will need to provide your name and contact number. This information will be stored separately to your questionnaire responses.

##### Do I have to take part?

You do not have to take part in this study. You are free to decide not to take part and you can drop out at any time without giving a reason. To withdraw from the study, just close the browser window without submitting your answers. If you have any questions about the study you can speak to the researcher (Emma Windle) or email her later at: e.h.windle@qmul.ac.uk.

1 / 20

##### What happens to my personal information?

Queen Mary University of London is the sponsor for this study based in the United Kingdom. We will be using information from you in order to undertake this study and will act as the data controller for this study. This means that we are responsible for looking after your information and using it properly. Identifiable information will be kept within the NHS Trust site and shared without identifiers with QMUL.

Your rights to access, change or move your information are limited, as we need to manage your information in specific ways in order for the research to be reliable and accurate. If you withdraw from the study, we will keep the information about you that we have already obtained. To safeguard your rights, we will use the minimum personally-identifiable information possible.

You can find out more about how we use your information at <http://www.arcs.qmul.ac.uk/media/arcs/policyzone/Privacy-Notice-for-Research-Participants.pdf>

The NHS Trust will collect information from you for this research study in accordance with our instructions.

The NHS Trust will keep your name and contact details confidential and will not pass this information to Queen Mary University of London. The Trust will use this information as needed, to contact you about the research study and to oversee the quality of the study. Certain individuals from Queen Mary University of London and regulatory organisations may look at your research records to check the accuracy of the research study. Queen Mary University of London will only receive information without any identifying information. The people who analyse the information will not be able to identify you and will not be able to find out your name or contact details.

##### What are the possible benefits of taking part?

There is no immediate definite benefit to taking part in this research. You will be helping us to gain an understanding of people's attitudes towards the arts therapies.

##### What are the possible disadvantages of taking part?

This is a brief survey and we believe that it is safe for you to take part. However, if you feel uncomfortable or decide you do not want to participate, you can stop the questionnaire at any time.

##### Who is sponsoring and funding the research?

2 / 20

Queen Mary University of London is sponsoring this research and it is funded by East London NHS Foundation Trust (ELFT).

##### Who has reviewed this study?

The Research Ethics Committee of South Central - Oxford C Research Ethics Committee have approved this study (REC:18/SC/0701).

##### What will happen with the results of the study?

The results of the study will be submitted for publication in a peer-reviewed journal, and be a part of the Chief Investigator's (CI) PhD thesis.

##### What if there is a problem?

If you have any concerns about this study, you should speak to the researcher.

Or contact Emma Windle (CI), who can be reached at e.h.windle@qmul.ac.uk.

If you wish to complain formally, you can do this by contacting the Patient Advisory Liaison Service (PALS):

Queen Mary University of London has agreed that if you are harmed as a result of your participation in the study, you will be compensated, provided that, on the balance of probabilities, an injury was caused as a direct result of the intervention or procedures you received during the course of the study. These special compensation arrangements apply where an injury is caused to you that would not have occurred if you were not in the trial. These arrangements do not affect your right to pursue a claim through legal action.

3 / 20

#### Page 2: Consent Form

I confirm that I have read and understood the information sheet for the 'Preferences for the Arts Therapies'. I have been given the opportunity to ask questions.

I understand that the study involves completing a short questionnaire about my perspectives of the arts therapies.

I understand that my participation is voluntary and that I can withdraw at any time by closing the browser. Once I have submitted my answers I can no longer withdraw from the study.

I understand that all information will be kept confidential and any personal details will be anonymised. I understand that confidentiality may need to be broken if there is a concern for risk to other people or to myself.

I agree to take part in the above study. \* Required

Yes  
 No

Date \* Required

Dates need to be in the format 'DDMMYYYY', for example 27/03/1980.  
  
(dd/mm/yyyy)

4 / 20



## Page 3: To be completed by the researcher

Site name \* Required

Participant ID \* Required

5 / 20

## Page 4: Questionnaire

What is your year of birth?

6 / 20

## Page 5

What is your gender?

- Male
- Female
- Other
- Prefer not to say

7 / 20

## Page 6

What is your ethnic group? Choose one option that best describes your ethnic group or background

- White - English/Welsh/Scottish/Northern Irish/British
- White - Irish
- White - Gypsy or Irish Traveller
- White - Any other White background, please describe
- Mixed/multiple ethnic groups - White and Black Caribbean
- Mixed/multiple ethnic groups - White and Black African
- Mixed/multiple ethnic groups - White and Asian
- Mixed/multiple ethnic groups - Any other Mixed/Multiple ethnic background, please describe
- Asian/Asian British - Indian
- Asian/Asian British - Pakistani
- Asian/Asian British - Bangladeshi
- Asian/Asian British - Chinese
- Asian/Asian British - Any other Asian background, please describe
- Black/ African/Caribbean/Black British - African
- Black/ African/Caribbean/Black British - Caribbean
- Black/ African/Caribbean/Black British - Any other Black/African/Caribbean background, please describe
- Other ethnic group - Arab
- Other ethnic group - Any other ethnic group, please describe
- Prefer not to say

If you selected Other, please specify:

8 / 20

Page 7

What level of education have you completed?

- Primary school (up to age 11)
- Secondary school (up to age 16)
- College (up to age 18)
- University (18+)
- Prefer not to say

9 / 20

Page 8

Have you ever received talking therapy (e.g. cognitive behavioural therapy, psychotherapy, counselling)?

- Yes
- No
- Prefer not to say

Was this individual or group therapy?

- Individual
- Group
- Both
- Prefer not to say

10 / 20

Page 9

Are you currently employed by mental health services?

- Yes
- No
- Prefer not to say

If yes, in which category do you work?

11 / 20

Page 10

Many people use different art forms therapeutically to support their mental wellbeing. The 'arts therapies' involve the use of creative art forms as a mode of expression and communication, supported by an accredited arts therapist. There are four main types of arts therapies; music therapy, dance-movement therapy, art therapy and dramatherapy.

12 / 20

peer review

1  
2  
3  
4  
5  
6  
7  
8  
9  
10  
11  
12  
13  
14  
15  
16  
17  
18  
19  
20  
21  
22  
23  
24  
25  
26  
27  
28  
29  
30  
31  
32  
33  
34  
35  
36  
37  
38  
39  
40  
41  
42  
43  
44  
45  
46  
47  
48  
49  
50  
51  
52  
53  
54  
55  
56  
57  
58  
59  
60

Page 11

If you were seeking help for psychological problems would you be interested in taking part in group arts therapies?

Yes  
 No  
 Not sure

13 / 20

Page 12

Please tick the relevant boxes (can be more than one):

Please don't select more than 5 answer(s) per row.

Please select at least 2 answer(s).

|                                                              | Music therapy            | Dance-movement therapy   | Art therapy              | Dramatherapy             | None                     | Other                    |
|--------------------------------------------------------------|--------------------------|--------------------------|--------------------------|--------------------------|--------------------------|--------------------------|
| Which arts therapies have you heard of before?               | <input type="checkbox"/> |
| Have you ever attended any of these types of arts therapies? | <input type="checkbox"/> |

If other, please give details:

14 / 20

Page 13

Please choose **one** modality for each of these questions:

Please don't select more than 1 answer(s) per row.

Please select at least 2 answer(s).

|                                                  | Music therapy            | Dance-movement therapy   | Art therapy              | Dramatherapy             |
|--------------------------------------------------|--------------------------|--------------------------|--------------------------|--------------------------|
| Which type would you MOST like to take part in?  | <input type="checkbox"/> | <input type="checkbox"/> | <input type="checkbox"/> | <input type="checkbox"/> |
| Which type would you LEAST like to take part in? | <input type="checkbox"/> | <input type="checkbox"/> | <input type="checkbox"/> | <input type="checkbox"/> |

15 / 20

Page 15: Thank you for taking part in this survey

Would you like to be entered into a prize draw to win £50 of shopping vouchers?

Yes  
 No

If yes, please follow this link to enter your contact details:

<https://qmul.onlinesurveys.ac.uk/prize-draw-entry>

17 / 20

Page 16

Would you like to be contacted about future opportunities to be involved in research?

Yes

No

If yes, please follow this link to enter your contact details:

<https://qmul.onlinesurveys.ac.uk/contact-details-for-future-research>

Page 17

Thank you for taking the time to complete this survey.

If you have any questions or concerns, please email Emma Windle: [e.h.windle@qmul.ac.uk](mailto:e.h.windle@qmul.ac.uk).

If you would like to know more about the arts therapies, please follow this link:

<https://www.youtube.com/watch?v=GMR5vV1PJM0>

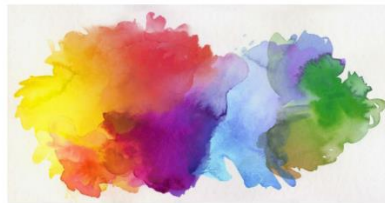

Key for selection options

9.a - If yes, in which category do you work?

- Medical
- Nursing
- Allied health professional
- Support staff
- Administrative
- Carer
- Other

18 / 20

19 / 20

peer review only

1  
2  
3  
4  
5  
6  
7  
8  
9  
10  
11  
12  
13  
14  
15  
16  
17  
18  
19  
20  
21  
22  
23  
24  
25  
26  
27  
28  
29  
30  
31  
32  
33  
34  
35  
36  
37  
38  
39  
40  
41  
42  
43  
44  
45  
46  
47  
48  
49  
50  
51  
52  
53  
54  
55  
56  
57  
58  
59  
60

## Appendix C: Sample characteristics

| Characteristic                                  |                                                             | Mental health patients (n=685) | General population sample (n=856) | Total (n=1541) |
|-------------------------------------------------|-------------------------------------------------------------|--------------------------------|-----------------------------------|----------------|
| Gender*                                         | Male                                                        | 343 (50.15%)                   | 271 (31.73%)                      | 614 (39.92%)   |
|                                                 | Female                                                      | 334 (48.83%)                   | 581 (68.03%)                      | 915 (59.49%)   |
|                                                 | Other                                                       | 7 (1.02%)                      | 2 (0.23%)                         | 9 (0.59%)      |
| Ethnic group                                    | White British                                               | 489 (73.20%)                   | 600 (72.46%)                      | 1089 (72.79%)  |
|                                                 | BAME                                                        | 179 (26.80%)                   | 228 (28.54%)                      | 407 (27.21%)   |
| Age group*                                      | Under 45                                                    | 316 (50.72%)                   | 526 (61.96%)                      | 842 (57.2%)    |
|                                                 | Over 45                                                     | 307 (49.28%)                   | 323 (38.04%)                      | 630 (42.8%)    |
| Level of education*                             | Not university educated                                     | 474 (70.01%)                   | 244 (28.94%)                      | 718 (47.24%)   |
|                                                 | University educated                                         | 203 (29.99%)                   | 599 (71.06%)                      | 802 (52.76%)   |
| Diagnosis                                       | F20-F29 Schizophrenia, schizotypal and delusional disorders | 283 (43.61%)                   |                                   |                |
|                                                 | F30-F39 Mood (affective) disorders                          | 177 (27.27%)                   |                                   |                |
|                                                 | Other (F0-F19, F40-F99)                                     | 189 (29.12%)                   |                                   |                |
| Time in services                                | Less than 8 years                                           | 328 (53.51%)                   |                                   |                |
|                                                 | More than 8 years                                           | 285 (46.49%)                   |                                   |                |
| Part of a Trust with an arts therapies service? |                                                             | 234 (37.34%)                   |                                   |                |
| Received a talking therapy?*                    |                                                             | 504 (74.34%)                   | 386 (45.41%)                      | 890 (58.25%)   |

\* = significant differences between groups – Chi<sup>2</sup> at 5%

**Appendix D: Multinomial Logistic Regression Results: Would you be interested in taking part in group arts therapies? (Yes as base outcome)**

| Participants                      | Would you be interested?       | Variable                            | RRR                      | Std. error | 95% CI |      |      |
|-----------------------------------|--------------------------------|-------------------------------------|--------------------------|------------|--------|------|------|
| All (n=1510)                      | Yes                            | (Base outcome)                      |                          |            |        |      |      |
|                                   | No                             | Mental health or General population | 0.89                     | 0.14       | 0.66   | 1.19 |      |
|                                   |                                | Male or female*                     | 0.56                     | 0.07       | 0.43   | 0.72 |      |
|                                   |                                | Not uni or uni                      | 0.90                     | 0.13       | 0.68   | 1.19 |      |
|                                   |                                | Heard of arts therapies             | 0.72                     | 0.12       | 0.51   | 1.00 |      |
|                                   |                                | Attended arts therapies*            | 0.53                     | 0.10       | 0.37   | 0.76 |      |
|                                   | Not sure                       | Mental health or General population | 1.04                     | 0.18       | 0.74   | 1.45 |      |
|                                   |                                | Male or female                      | 0.98                     | 0.15       | 0.73   | 1.32 |      |
|                                   |                                | Not uni or uni                      | 1.13                     | 0.18       | 0.83   | 1.55 |      |
|                                   |                                | Heard of arts therapies             | 1.02                     | 0.21       | 0.68   | 1.52 |      |
|                                   |                                | Attended arts therapies*            | 0.42                     | 0.09       | 0.28   | 0.64 |      |
|                                   | Mental health patients (n=651) | Yes                                 | (Base outcome)           |            |        |      |      |
|                                   |                                | No                                  | Male or female*          | 0.61       | 0.12   | 0.41 | 0.91 |
|                                   |                                |                                     | Not uni or uni*          | 0.61       | 0.14   | 0.38 | 0.97 |
|                                   |                                |                                     | Diagnosis F3             | 0.79       | 0.19   | 0.49 | 1.27 |
| Diagnosis Other*                  |                                |                                     | 0.51                     | 0.13       | 0.31   | 0.84 |      |
| Heard of arts therapies           |                                |                                     | 1.06                     | 0.27       | 0.64   | 1.73 |      |
| Not sure                          |                                | Attended arts therapies*            | 0.49                     | 0.11       | 0.31   | 0.76 |      |
|                                   |                                | Male or female                      | 0.89                     | 0.22       | 0.55   | 1.44 |      |
|                                   |                                | Not uni or uni                      | 1.63                     | 0.41       | 0.99   | 2.67 |      |
|                                   |                                | Diagnosis F3                        | 1.66                     | 0.49       | 0.93   | 2.97 |      |
|                                   |                                | Diagnosis Other                     | 1.00                     | 0.31       | 0.55   | 1.84 |      |
| General population sample (n=850) |                                | Yes                                 | (Base outcome)           |            |        |      |      |
|                                   |                                | No                                  | Male or female*          | 0.60       | 0.11   | 0.42 | 0.86 |
|                                   |                                |                                     | Not uni or uni           | 1.20       | 0.24   | 0.81 | 1.78 |
|                                   |                                |                                     | Heard of arts therapies* | 0.54       | 0.13   | 0.34 | 0.86 |
|                                   | Attended arts therapies*       |                                     | 0.44                     | 0.17       | 0.21   | 0.92 |      |
|                                   | Not sure                       | Male or female                      | 1.04                     | 0.21       | 0.70   | 1.55 |      |
|                                   |                                | Not uni or uni                      | 0.92                     | 0.18       | 0.62   | 1.36 |      |
|                                   |                                | Heard of arts therapies             | 0.96                     | 0.27       | 0.55   | 1.67 |      |
|                                   |                                | Attended arts therapies*            | 0.51                     | 0.17       | 0.26   | 1.00 |      |

RRR=relative risk, CI=confidence interval, \*=significant variables at 5%

## Appendix E: Multinomial Logistic Regression Results: Which type would you MOST prefer? (Art therapy as base outcome)

| Participants                    | Type                              | Variable                             | RRR                    | Std. error | 95% CI |       |      |
|---------------------------------|-----------------------------------|--------------------------------------|------------------------|------------|--------|-------|------|
| All<br>(n=1505)                 | Music therapy                     | Mental health or General population* | 0.68                   | 0.10       | 0.51   | 0.91  |      |
|                                 |                                   | Male or female*                      | 0.43                   | 0.06       | 0.33   | 0.55  |      |
|                                 |                                   | White British or BAME                | 1.30                   | 0.19       | 0.98   | 1.74  |      |
|                                 |                                   | Not uni or uni                       | 0.81                   | 0.11       | 0.61   | 1.06  |      |
|                                 |                                   | Heard of arts therapies              | 1.06                   | 0.19       | 0.75   | 1.50  |      |
|                                 |                                   | Attended music therapy*              | 4.77                   | 1.30       | 2.80   | 8.12  |      |
|                                 |                                   | Attended dance-movement therapy      | 1.38                   | 0.51       | 0.66   | 2.85  |      |
|                                 |                                   | Attended art therapy*                | 0.26                   | 0.06       | 0.17   | 0.40  |      |
|                                 |                                   | Attended dramatherapy*               | 0.48                   | 0.17       | 0.23   | 0.98  |      |
|                                 | Dance-movement therapy            | Mental health or General population  | 1.15                   | 0.24       | 0.77   | 1.72  |      |
|                                 |                                   | Male or female*                      | 1.61                   | 0.32       | 1.09   | 2.38  |      |
|                                 |                                   | White British or BAME                | 1.39                   | 0.26       | 0.96   | 2.01  |      |
|                                 |                                   | Not uni or uni                       | 1.04                   | 0.20       | 0.72   | 1.51  |      |
|                                 |                                   | Heard of arts therapies*             | 0.62                   | 0.14       | 0.39   | 0.97  |      |
|                                 |                                   | Attended music therapy               | 1.34                   | 0.52       | 0.62   | 2.88  |      |
|                                 |                                   | Attended dance-movement therapy*     | 4.41                   | 1.78       | 2.00   | 9.72  |      |
|                                 |                                   | Attended art therapy*                | 0.56                   | 0.15       | 0.33   | 0.95  |      |
|                                 | Art therapy                       | (Base outcome)                       |                        |            |        |       |      |
|                                 | Dramatherapy                      | Mental health or General population  | 0.87                   | 0.20       | 0.56   | 1.37  |      |
|                                 |                                   | Male or female *                     | 0.52                   | 0.10       | 0.35   | 0.76  |      |
|                                 |                                   | White British or BAME*               | 1.54                   | 0.33       | 1.01   | 2.34  |      |
|                                 |                                   | Not uni or uni                       | 1.22                   | 0.26       | 0.80   | 1.86  |      |
|                                 |                                   | Heard of arts therapies              | 0.62                   | 0.16       | 0.37   | 1.04  |      |
|                                 |                                   | Attended music therapy               | 1.95                   | 0.75       | 0.91   | 4.16  |      |
|                                 |                                   | Attended dance-movement therapy      | 1.62                   | 0.77       | 0.64   | 4.10  |      |
|                                 |                                   | Attended art therapy                 | 0.75                   | 0.22       | 0.43   | 1.32  |      |
|                                 | Mental health patients<br>(n=667) | Music therapy                        | Attended dramatherapy* | 2.35       | 0.88   | 1.13  | 4.88 |
|                                 |                                   |                                      | Male or female *       | 0.39       | 0.08   | 0.27  | 0.57 |
| White British or BAME*          |                                   |                                      | 1.72                   | 0.40       | 1.10   | 2.70  |      |
| Not uni or uni                  |                                   |                                      | 0.79                   | 0.17       | 0.51   | 1.21  |      |
| Interested in arts therapies    |                                   |                                      | 1.07                   | 0.14       | 0.83   | 1.38  |      |
| Heard of arts therapies         |                                   |                                      | 0.99                   | 0.25       | 0.60   | 1.64  |      |
| Attended music therapy*         |                                   |                                      | 5.38                   | 1.82       | 2.77   | 10.45 |      |
| Attended dance-movement therapy |                                   |                                      | 1.22                   | 0.54       | 0.51   | 2.92  |      |
| Attended art therapy*           |                                   |                                      | 0.27                   | 0.07       | 0.17   | 0.44  |      |
| Attended dramatherapy           | 0.73                              | 0.33                                 | 0.31                   | 1.76       |        |       |      |

|                                   |                        |                                  |      |      |      |       |
|-----------------------------------|------------------------|----------------------------------|------|------|------|-------|
|                                   | Dance-movement therapy | Male or female                   | 1.14 | 0.34 | 0.64 | 2.04  |
|                                   |                        | White British or BAME            | 1.84 | 0.59 | 0.98 | 3.45  |
|                                   |                        | Not uni or uni                   | 1.61 | 0.48 | 0.90 | 2.88  |
|                                   |                        | Interested in arts therapies     | 0.76 | 0.16 | 0.51 | 1.14  |
|                                   |                        | Heard of arts therapies          | 0.60 | 0.22 | 0.29 | 1.23  |
|                                   |                        | Attended music therapy           | 0.53 | 0.31 | 0.17 | 1.69  |
|                                   |                        | Attended dance-movement therapy* | 5.00 | 2.68 | 1.74 | 14.32 |
|                                   |                        | Attended art therapy*            | 0.50 | 0.17 | 0.25 | 0.98  |
|                                   |                        | Attended dramatherapy            | 2.18 | 1.13 | 0.79 | 6.04  |
|                                   | Art therapy            | (Base outcome)                   |      |      |      |       |
|                                   | Dramatherapy           | Male or female *                 | 0.35 | 0.11 | 0.20 | 0.64  |
|                                   |                        | White British or BAME*           | 1.99 | 0.65 | 1.05 | 3.79  |
|                                   |                        | Not uni or uni                   | 1.38 | 0.44 | 0.74 | 2.58  |
|                                   |                        | Interested in arts therapies     | 0.67 | 0.15 | 0.42 | 1.05  |
|                                   |                        | Heard of arts therapies*         | 0.43 | 0.17 | 0.20 | 0.92  |
|                                   |                        | Attended music therapy*          | 2.58 | 1.23 | 1.02 | 6.55  |
|                                   |                        | Attended dance-movement therapy  | 1.88 | 1.05 | 0.63 | 5.59  |
|                                   |                        | Attended art therapy             | 0.64 | 0.23 | 0.31 | 1.30  |
|                                   |                        | Attended dramatherapy*           | 3.10 | 1.50 | 1.20 | 8.01  |
| General population sample (n=850) | Music therapy          | Male or female *                 | 0.43 | 0.07 | 0.30 | 0.60  |
|                                   |                        | Attended music therapy*          | 4.32 | 2.13 | 1.65 | 11.35 |
|                                   |                        | Attended dance-movement therapy  | 2.21 | 1.67 | 0.50 | 9.75  |
|                                   |                        | Attended art therapy*            | 0.21 | 0.11 | 0.08 | 0.58  |
|                                   |                        | Attended dramatherapy*           | 0.15 | 0.12 | 0.03 | 0.74  |
|                                   | Dance-movement therapy | Male or female *                 | 1.66 | 0.42 | 1.00 | 2.74  |
|                                   |                        | Attended music therapy*          | 3.39 | 1.76 | 1.22 | 9.40  |
|                                   |                        | Attended dance-movement therapy* | 7.05 | 4.58 | 1.98 | 25.15 |
|                                   |                        | Attended art therapy             | 0.47 | 0.22 | 0.19 | 1.19  |
|                                   | Attended dramatherapy  | 0.29                             | 0.21 | 0.07 | 1.20 |       |
|                                   | Art therapy            | (Base outcome)                   |      |      |      |       |
|                                   | Dramatherapy           | Male or female                   | 0.67 | 0.18 | 0.39 | 1.14  |
|                                   |                        | Attended music therapy           | 0.44 | 0.40 | 0.08 | 2.57  |
|                                   |                        | Attended dance-movement therapy  | 1.56 | 1.47 | 0.25 | 9.93  |
|                                   |                        | Attended art therapy             | 1.27 | 0.63 | 0.48 | 3.35  |
| Attended dramatherapy             |                        | 1.90                             | 1.12 | 0.59 | 6.06 |       |

RRR=relative risk, CI=confidence interval, \*=significant variables at 5%



## Appendix F: Multinomial Logistic Regression Results for Reasons Given for Most Preferred Modality

| Participants           | Reason                              | Variable                             | RRR  | Std. error | 95% CI |      |
|------------------------|-------------------------------------|--------------------------------------|------|------------|--------|------|
|                        | Enjoyment (n=578)                   | (Base outcome)                       |      |            |        |      |
| All (n=1519)           | Expectations of helpfulness (n=294) | Mental health or general population  | 0.97 | 0.19       | 0.67   | 1.42 |
|                        |                                     | Male or female                       | 1.18 | 0.20       | 0.84   | 1.65 |
|                        |                                     | University educated or not*          | 1.59 | 0.28       | 1.13   | 2.23 |
|                        |                                     | Under or over 45                     | 0.81 | 0.13       | 0.59   | 1.10 |
|                        |                                     | Attended talking therapy             | 0.84 | 0.14       | 0.61   | 1.17 |
|                        |                                     | Interested in taking part – no*      | 0.64 | 0.13       | 0.42   | 0.95 |
|                        |                                     | Interested in taking part – not sure | 0.66 | 0.15       | 0.42   | 1.01 |
|                        |                                     | Attended arts therapies              | 1.00 | 0.38       | 0.47   | 2.13 |
|                        |                                     | Attended art therapy                 | 1.33 | 0.55       | 0.60   | 2.98 |
|                        |                                     | Most prefer art therapy*             | 1.63 | 0.40       | 1.00   | 2.65 |
|                        |                                     | Most prefer dance-movement therapy*  | 2.11 | 0.41       | 1.43   | 3.09 |
|                        |                                     | Most prefer dramatherapy*            | 2.79 | 0.81       | 1.58   | 4.95 |
|                        |                                     | Least prefer art therapy             | 0.88 | 0.25       | 0.50   | 1.53 |
|                        |                                     | Least prefer dance-movement therapy  | 0.90 | 0.30       | 0.47   | 1.72 |
|                        | Least prefer dramatherapy           | 0.94                                 | 0.26 | 0.55       | 1.60   |      |
|                        | Feeling capable (n=228)             | Mental health or general population  | 0.88 | 0.18       | 0.59   | 1.32 |
|                        |                                     | Male or female*                      | 0.67 | 0.12       | 0.47   | 0.96 |
|                        |                                     | University educated or not*          | 1.91 | 0.36       | 1.33   | 2.76 |
|                        |                                     | Under or over 45                     | 1.21 | 0.21       | 0.87   | 1.69 |
|                        |                                     | Attended talking therapy             | 0.75 | 0.13       | 0.53   | 1.07 |
|                        |                                     | Interested in taking part - no       | 1.09 | 0.22       | 0.74   | 1.62 |
|                        |                                     | Interested in taking part – not sure | 0.91 | 0.21       | 0.58   | 1.42 |
|                        |                                     | Attended arts therapies              | 0.97 | 0.39       | 0.45   | 2.12 |
|                        |                                     | Attended art therapy                 | 0.77 | 0.34       | 0.33   | 1.82 |
|                        |                                     | Most prefer art therapy*             | 0.54 | 0.17       | 0.29   | 1.01 |
|                        |                                     | Most prefer dance-movement therapy   | 1.46 | 0.29       | 0.99   | 2.16 |
|                        |                                     | Most prefer dramatherapy*            | 2.20 | 0.65       | 1.23   | 3.93 |
|                        |                                     | Least prefer art therapy             | 0.82 | 0.26       | 0.44   | 1.53 |
|                        |                                     | Least prefer dance-movement therapy  | 0.87 | 0.32       | 0.42   | 1.80 |
|                        | Least prefer dramatherapy           | 0.83                                 | 0.27 | 0.44       | 1.55   |      |
| Impact on mood (n=197) | Mental health or general population | 1.34                                 | 0.30 | 0.87       | 2.07   |      |
|                        | Male or female                      | 1.13                                 | 0.22 | 0.78       | 1.66   |      |
|                        | University educated or not          | 1.06                                 | 0.21 | 0.72       | 1.56   |      |
|                        | Under or over 45*                   | 0.65                                 | 0.12 | 0.45       | 0.94   |      |

|                                |                                     |                                       |      |      |      |       |
|--------------------------------|-------------------------------------|---------------------------------------|------|------|------|-------|
|                                |                                     | Attended talking therapy*             | 0.69 | 0.13 | 0.48 | 1.01  |
|                                |                                     | Interested in taking part - no        | 0.67 | 0.15 | 0.43 | 1.04  |
|                                |                                     | Interested in taking part – not sure  | 0.66 | 0.16 | 0.41 | 1.07  |
|                                |                                     | Attended arts therapies               | 1.17 | 0.47 | 0.54 | 2.55  |
|                                |                                     | Attended art therapy                  | 0.91 | 0.40 | 0.38 | 2.17  |
|                                |                                     | Most prefer art therapy*              | 0.44 | 0.14 | 0.24 | 0.81  |
|                                |                                     | Most prefer dance-movement therapy    | 0.94 | 0.19 | 0.63 | 1.40  |
|                                |                                     | Most prefer dramatherapy*             | 0.07 | 0.08 | 0.01 | 0.56  |
|                                |                                     | Least prefer art therapy              | 1.22 | 0.53 | 0.52 | 2.87  |
|                                |                                     | Least prefer dance-movement therapy   | 1.11 | 0.56 | 0.41 | 2.98  |
|                                |                                     | Least prefer dramatherapy             | 1.75 | 0.74 | 0.77 | 3.99  |
|                                | Other (n=222)                       | Mental health or general population   | 1.16 | 0.25 | 0.76 | 1.77  |
|                                |                                     | Male or female                        | 0.83 | 0.16 | 0.57 | 1.20  |
|                                |                                     | University educated or not*           | 1.71 | 0.33 | 1.17 | 2.49  |
|                                |                                     | Under or over 45                      | 1.36 | 0.24 | 0.97 | 1.92  |
|                                |                                     | Attended talking therapy              | 0.98 | 0.18 | 0.69 | 1.39  |
|                                |                                     | Interested in taking part - no        | 1.29 | 0.27 | 0.86 | 1.94  |
|                                |                                     | Interested in taking part – not sure  | 1.19 | 0.27 | 0.76 | 1.85  |
|                                |                                     | Attended arts therapies               | 0.72 | 0.35 | 0.28 | 1.86  |
|                                |                                     | Attended art therapy                  | 0.90 | 0.47 | 0.32 | 2.53  |
|                                |                                     | Most prefer art therapy               | 1.64 | 0.50 | 0.90 | 2.98  |
|                                |                                     | Most prefer dance-movement therapy*   | 4.95 | 1.14 | 3.14 | 7.78  |
|                                |                                     | Most prefer dramatherapy*             | 5.45 | 1.81 | 2.85 | 10.43 |
|                                |                                     | Least prefer art therapy              | 0.71 | 0.23 | 0.38 | 1.32  |
|                                |                                     | Least prefer dance-movement therapy   | 1.16 | 0.44 | 0.56 | 2.43  |
|                                | Least prefer dramatherapy           | 1.18                                  | 0.37 | 0.65 | 2.17 |       |
| Mental health patients (n=678) | Enjoyment (n=276)                   | (Base outcome)                        |      |      |      |       |
|                                | Expectations of helpfulness (n=135) | Male or female                        | 1.38 | 0.32 | 0.87 | 2.18  |
|                                |                                     | University educated or not*           | 1.61 | 0.40 | 0.99 | 2.61  |
|                                |                                     | Attended talking therapy              | 0.73 | 0.20 | 0.42 | 1.25  |
|                                |                                     | Heard of the arts therapies           | 1.60 | 0.55 | 0.81 | 3.16  |
|                                |                                     | Interested in taking part - no        | 0.58 | 0.18 | 0.32 | 1.05  |
|                                |                                     | Interested in taking part – not sure* | 0.40 | 0.16 | 0.19 | 0.86  |
|                                |                                     | Attended arts therapies               | 0.51 | 0.34 | 0.14 | 1.85  |
|                                |                                     | Attended music therapy                | 1.25 | 0.46 | 0.61 | 2.58  |
|                                |                                     | Attended art therapy                  | 2.41 | 1.48 | 0.72 | 8.05  |
|                                |                                     | Most prefer art therapy               | 1.68 | 0.65 | 0.79 | 3.57  |
|                                |                                     | Most prefer dance-movement therapy*   | 2.20 | 0.60 | 1.29 | 3.76  |
|                                |                                     | Most prefer dramatherapy*             | 2.40 | 0.94 | 1.11 | 5.19  |
|                                | Male or female                      | 0.86                                  | 0.21 | 0.53 | 1.39 |       |

|                                   |                                     |                                      |      |      |       |       |
|-----------------------------------|-------------------------------------|--------------------------------------|------|------|-------|-------|
|                                   | Feeling capable (n=110)             | University educated or not*          | 1.79 | 0.46 | 1.08  | 2.95  |
|                                   |                                     | Attended talking therapy             | 0.72 | 0.20 | 0.42  | 1.22  |
|                                   |                                     | Heard of the arts therapies          | 0.89 | 0.27 | 0.49  | 1.63  |
|                                   |                                     | Interested in taking part - no       | 1.49 | 0.41 | 0.87  | 2.55  |
|                                   |                                     | Interested in taking part – not sure | 1.05 | 0.36 | 0.54  | 2.04  |
|                                   |                                     | Attended arts therapies              | 1.56 | 0.90 | 0.51  | 4.80  |
|                                   |                                     | Attended music therapy               | 0.98 | 0.41 | 0.43  | 2.24  |
|                                   |                                     | Attended art therapy                 | 0.68 | 0.36 | 0.24  | 1.90  |
|                                   |                                     | Most prefer art therapy              | 1.02 | 0.44 | 0.44  | 2.39  |
|                                   |                                     | Most prefer dance-movement therapy*  | 1.93 | 0.54 | 1.12  | 3.33  |
|                                   |                                     | Most prefer dramatherapy*            | 2.18 | 0.86 | 1.00  | 4.74  |
|                                   | Impact on mood (n=78)               | Male or female                       | 1.56 | 0.43 | 0.91  | 2.68  |
|                                   |                                     | University educated or not           | 1.11 | 0.34 | 0.61  | 2.02  |
|                                   |                                     | Attended talking therapy*            | 0.49 | 0.17 | 0.25  | 0.97  |
|                                   |                                     | Heard of the arts therapies          | 1.11 | 0.43 | 0.52  | 2.35  |
|                                   |                                     | Interested in taking part - no       | 0.98 | 0.32 | 0.52  | 1.86  |
|                                   |                                     | Interested in taking part – not sure | 0.77 | 0.31 | 0.35  | 1.69  |
|                                   |                                     | Attended arts therapies              | 1.56 | 0.95 | 0.47  | 5.13  |
|                                   |                                     | Attended music therapy               | 1.64 | 0.74 | 0.68  | 3.99  |
|                                   |                                     | Attended art therapy                 | 0.64 | 0.34 | 0.23  | 1.82  |
|                                   |                                     | Most prefer art therapy              | 0.51 | 0.27 | 0.18  | 1.44  |
|                                   |                                     | Most prefer dance-movement therapy   | 0.95 | 0.29 | 0.52  | 1.74  |
|                                   | Most prefer dramatherapy            | 0.00                                 | 0.00 | 0.00 | .     |       |
|                                   | Other (n=79)                        | Male or female                       | 1.21 | 0.35 | 0.69  | 2.13  |
|                                   |                                     | University educated or not           | 1.63 | 0.49 | 0.90  | 2.96  |
|                                   |                                     | Attended talking therapy             | 1.00 | 0.32 | 0.54  | 1.88  |
|                                   |                                     | Heard of the arts therapies          | 0.87 | 0.31 | 0.44  | 1.73  |
|                                   |                                     | Interested in taking part - no       | 1.12 | 0.39 | 0.56  | 2.22  |
|                                   |                                     | Interested in taking part – not sure | 1.34 | 0.50 | 0.65  | 2.79  |
|                                   |                                     | Attended arts therapies              | 0.57 | 0.51 | 0.10  | 3.28  |
|                                   |                                     | Attended music therapy               | 1.01 | 0.55 | 0.34  | 2.94  |
|                                   |                                     | Attended art therapy                 | 1.31 | 1.11 | 0.25  | 6.96  |
|                                   |                                     | Most prefer art therapy*             | 3.89 | 1.93 | 1.48  | 10.27 |
|                                   |                                     | Most prefer dance-movement therapy*  | 5.72 | 2.22 | 2.67  | 12.26 |
|                                   | Most prefer dramatherapy*           | 9.46                                 | 4.46 | 3.75 | 23.84 |       |
| General population sample (n=841) | Enjoyment (n=302)                   | (Base outcome)                       |      |      |       |       |
|                                   | Expectations of helpfulness (n=159) | University educated or not*          | 1.71 | 0.39 | 1.09  | 2.69  |
|                                   |                                     | Most prefer art therapy*             | 2.01 | 0.63 | 1.09  | 3.70  |
|                                   |                                     | Most prefer dance-movement therapy*  | 2.25 | 0.59 | 1.35  | 3.76  |
|                                   |                                     | Most prefer dramatherapy*            | 3.59 | 1.41 | 1.67  | 7.73  |
|                                   | Least prefer art therapy            | 0.79                                 | 0.31 | 0.37 | 1.69  |       |

|  |                                     |                                     |                            |      |      |      |
|--|-------------------------------------|-------------------------------------|----------------------------|------|------|------|
|  |                                     | Least prefer dance-movement therapy | 0.78                       | 0.35 | 0.32 | 1.88 |
|  |                                     | Least prefer dramatherapy           | 0.61                       | 0.23 | 0.29 | 1.26 |
|  | Feeling capable (n=118)             | University educated or not*         | 1.75                       | 0.45 | 1.07 | 2.88 |
|  |                                     | Most prefer art therapy*            | 0.41                       | 0.16 | 0.19 | 0.90 |
|  |                                     | Most prefer dance-movement therapy  | 1.11                       | 0.29 | 0.67 | 1.85 |
|  |                                     | Most prefer dramatherapy            | 1.95                       | 0.79 | 0.89 | 4.30 |
|  |                                     | Least prefer art therapy            | 0.67                       | 0.29 | 0.29 | 1.55 |
|  |                                     | Least prefer dance-movement therapy | 0.73                       | 0.37 | 0.27 | 1.98 |
|  |                                     | Least prefer dramatherapy           | 0.54                       | 0.23 | 0.23 | 1.24 |
|  |                                     | Impact on mood (n=119)              | University educated or not | 1.14 | 0.27 | 0.72 |
|  | Most prefer art therapy             |                                     | 0.54                       | 0.19 | 0.27 | 1.09 |
|  | Most prefer dance-movement therapy  |                                     | 1.08                       | 0.27 | 0.67 | 1.77 |
|  | Most prefer dramatherapy            |                                     | 0.32                       | 0.25 | 0.07 | 1.49 |
|  | Least prefer art therapy            |                                     | 1.29                       | 0.78 | 0.40 | 4.21 |
|  | Least prefer dance-movement therapy |                                     | 0.97                       | 0.70 | 0.23 | 4.01 |
|  | Other (n=143)                       | Least prefer dramatherapy           | 1.78                       | 1.03 | 0.57 | 5.56 |
|  |                                     | University educated or not          | 1.44                       | 0.34 | 0.91 | 2.28 |
|  |                                     | Most prefer art therapy             | 1.00                       | 0.37 | 0.49 | 2.05 |
|  |                                     | Most prefer dance-movement therapy* | 3.65                       | 0.99 | 2.15 | 6.20 |
|  |                                     | Most prefer dramatherapy*           | 2.94                       | 1.29 | 1.25 | 6.96 |
|  |                                     | Least prefer art therapy            | 0.67                       | 0.28 | 0.29 | 1.51 |
|  |                                     | Least prefer dance-movement therapy | 1.17                       | 0.59 | 0.44 | 3.13 |
|  |                                     | Least prefer dramatherapy           | 0.82                       | 0.33 | 0.37 | 1.80 |

RRR=relative risk, CI=confidence interval, \*=significant variables at 5%

STROBE Statement—Checklist of items that should be included in reports of *cross-sectional studies*

|                              | Item No | Recommendation                                                                                                                                                                                    | Page No          |
|------------------------------|---------|---------------------------------------------------------------------------------------------------------------------------------------------------------------------------------------------------|------------------|
| <b>Title and abstract</b>    | 1       | (a) Indicate the study's design with a commonly used term in the title or the abstract                                                                                                            | 1                |
|                              |         | (b) Provide in the abstract an informative and balanced summary of what was done and what was found                                                                                               | 1                |
| <b>Introduction</b>          |         |                                                                                                                                                                                                   |                  |
| Background/rationale         | 2       | Explain the scientific background and rationale for the investigation being reported                                                                                                              | 2                |
| Objectives                   | 3       | State specific objectives, including any prespecified hypotheses                                                                                                                                  | 4                |
| <b>Methods</b>               |         |                                                                                                                                                                                                   |                  |
| Study design                 | 4       | Present key elements of study design early in the paper                                                                                                                                           | 4                |
| Setting                      | 5       | Describe the setting, locations, and relevant dates, including periods of recruitment, exposure, follow-up, and data collection                                                                   | 4                |
| Participants                 | 6       | (a) Give the eligibility criteria, and the sources and methods of selection of participants                                                                                                       | 4                |
| Variables                    | 7       | Clearly define all outcomes, exposures, predictors, potential confounders, and effect modifiers. Give diagnostic criteria, if applicable                                                          | 4                |
| Data sources/<br>measurement | 8*      | For each variable of interest, give sources of data and details of methods of assessment (measurement). Describe comparability of assessment methods if there is more than one group              | 5                |
| Bias                         | 9       | Describe any efforts to address potential sources of bias                                                                                                                                         | N/A              |
| Study size                   | 10      | Explain how the study size was arrived at                                                                                                                                                         | 16               |
| Quantitative variables       | 11      | Explain how quantitative variables were handled in the analyses. If applicable, describe which groupings were chosen and why                                                                      | 5                |
| Statistical methods          | 12      | (a) Describe all statistical methods, including those used to control for confounding                                                                                                             | 5                |
|                              |         | (b) Describe any methods used to examine subgroups and interactions                                                                                                                               | 5                |
|                              |         | (c) Explain how missing data were addressed                                                                                                                                                       | 5                |
|                              |         | (d) If applicable, describe analytical methods taking account of sampling strategy                                                                                                                | 5                |
|                              |         | (e) Describe any sensitivity analyses                                                                                                                                                             | N/A              |
| <b>Results</b>               |         |                                                                                                                                                                                                   |                  |
| Participants                 | 13*     | (a) Report numbers of individuals at each stage of study—eg numbers potentially eligible, examined for eligibility, confirmed eligible, included in the study, completing follow-up, and analysed | 7 and supplement |
|                              |         | (b) Give reasons for non-participation at each stage                                                                                                                                              | N/A              |
|                              |         | (c) Consider use of a flow diagram                                                                                                                                                                | N/A              |
| Descriptive data             | 14*     | (a) Give characteristics of study participants (eg demographic, clinical, social) and information on exposures and potential confounders                                                          | 6 and supplement |
|                              |         | (b) Indicate number of participants with missing data for each variable of interest                                                                                                               | supplement       |
| Outcome data                 | 15*     | Report numbers of outcome events or summary measures                                                                                                                                              | 7                |

|    |                          |    |                                                                                                                                                                                                              |
|----|--------------------------|----|--------------------------------------------------------------------------------------------------------------------------------------------------------------------------------------------------------------|
| 1  |                          |    |                                                                                                                                                                                                              |
| 2  | Main results             | 16 | (a) Give unadjusted estimates and, if applicable, confounder-adjusted estimates and their precision (eg, 95% confidence interval). Make clear which confounders were adjusted for and why they were included |
| 3  |                          |    | 7                                                                                                                                                                                                            |
| 4  |                          |    |                                                                                                                                                                                                              |
| 5  |                          |    |                                                                                                                                                                                                              |
| 6  |                          |    |                                                                                                                                                                                                              |
| 7  |                          |    |                                                                                                                                                                                                              |
| 8  |                          |    |                                                                                                                                                                                                              |
| 9  |                          |    |                                                                                                                                                                                                              |
| 10 |                          |    |                                                                                                                                                                                                              |
| 11 |                          |    |                                                                                                                                                                                                              |
| 12 |                          |    |                                                                                                                                                                                                              |
| 13 |                          |    |                                                                                                                                                                                                              |
| 14 |                          |    |                                                                                                                                                                                                              |
| 15 | <b>Discussion</b>        |    |                                                                                                                                                                                                              |
| 16 | Key results              | 18 | Summarise key results with reference to study objectives                                                                                                                                                     |
| 17 |                          |    | 14                                                                                                                                                                                                           |
| 18 | Limitations              | 19 | Discuss limitations of the study, taking into account sources of potential bias or imprecision. Discuss both direction and magnitude of any potential bias                                                   |
| 19 |                          |    | 16                                                                                                                                                                                                           |
| 20 |                          |    |                                                                                                                                                                                                              |
| 21 | Interpretation           | 20 | Give a cautious overall interpretation of results considering objectives, limitations, multiplicity of analyses, results from similar studies, and other relevant evidence                                   |
| 22 |                          |    | 15                                                                                                                                                                                                           |
| 23 |                          |    |                                                                                                                                                                                                              |
| 24 |                          |    |                                                                                                                                                                                                              |
| 25 | Generalisability         | 21 | Discuss the generalisability (external validity) of the study results                                                                                                                                        |
| 26 |                          |    | 17                                                                                                                                                                                                           |
| 27 | <b>Other information</b> |    |                                                                                                                                                                                                              |
| 28 | Funding                  | 22 | Give the source of funding and the role of the funders for the present study and, if applicable, for the original study on which the present article is based                                                |
| 29 |                          |    | 18                                                                                                                                                                                                           |
| 30 |                          |    |                                                                                                                                                                                                              |
| 31 |                          |    |                                                                                                                                                                                                              |
| 32 |                          |    |                                                                                                                                                                                                              |

\*Give information separately for exposed and unexposed groups.

**Note:** An Explanation and Elaboration article discusses each checklist item and gives methodological background and published examples of transparent reporting. The STROBE checklist is best used in conjunction with this article (freely available on the Web sites of PLoS Medicine at <http://www.plosmedicine.org/>, Annals of Internal Medicine at <http://www.annals.org/>, and Epidemiology at <http://www.epidem.com/>). Information on the STROBE Initiative is available at [www.strobe-statement.org](http://www.strobe-statement.org).

# BMJ Open

## Preferences for Group Arts Therapies: A Cross-Sectional Survey of Mental Health Patients and the General Population

|                                 |                                                                                                                                                                                                                                                                                                                                                                                                                          |
|---------------------------------|--------------------------------------------------------------------------------------------------------------------------------------------------------------------------------------------------------------------------------------------------------------------------------------------------------------------------------------------------------------------------------------------------------------------------|
| Journal:                        | <i>BMJ Open</i>                                                                                                                                                                                                                                                                                                                                                                                                          |
| Manuscript ID                   | bmjopen-2021-051173.R2                                                                                                                                                                                                                                                                                                                                                                                                   |
| Article Type:                   | Original research                                                                                                                                                                                                                                                                                                                                                                                                        |
| Date Submitted by the Author:   | 26-Jul-2021                                                                                                                                                                                                                                                                                                                                                                                                              |
| Complete List of Authors:       | Millard, Emma; Queen Mary University of London, Unit for Social and Community Psychiatry; East London NHS Foundation Trust<br>Medlicott, Emma; East London NHS Foundation Trust<br>Cardona, Jessica; East London NHS Foundation Trust<br>Priebe, Stefan; Queen Mary University of London, Unit for Social and Community Psychiatry<br>Carr, Catherine; Queen Mary University of London; East London NHS Foundation Trust |
| <b>Primary Subject Heading</b>: | Mental health                                                                                                                                                                                                                                                                                                                                                                                                            |
| Secondary Subject Heading:      | Patient-centred medicine                                                                                                                                                                                                                                                                                                                                                                                                 |
| Keywords:                       | Adult psychiatry < PSYCHIATRY, PSYCHIATRY, Depression & mood disorders < PSYCHIATRY, Schizophrenia & psychotic disorders < PSYCHIATRY                                                                                                                                                                                                                                                                                    |
|                                 |                                                                                                                                                                                                                                                                                                                                                                                                                          |

SCHOLARONE™  
Manuscripts



I, the Submitting Author has the right to grant and does grant on behalf of all authors of the Work (as defined in the below author licence), an exclusive licence and/or a non-exclusive licence for contributions from authors who are: i) UK Crown employees; ii) where BMJ has agreed a CC-BY licence shall apply, and/or iii) in accordance with the terms applicable for US Federal Government officers or employees acting as part of their official duties; on a worldwide, perpetual, irrevocable, royalty-free basis to BMJ Publishing Group Ltd ("BMJ") its licensees and where the relevant Journal is co-owned by BMJ to the co-owners of the Journal, to publish the Work in this journal and any other BMJ products and to exploit all rights, as set out in our [licence](#).

The Submitting Author accepts and understands that any supply made under these terms is made by BMJ to the Submitting Author unless you are acting as an employee on behalf of your employer or a postgraduate student of an affiliated institution which is paying any applicable article publishing charge ("APC") for Open Access articles. Where the Submitting Author wishes to make the Work available on an Open Access basis (and intends to pay the relevant APC), the terms of reuse of such Open Access shall be governed by a Creative Commons licence – details of these licences and which [Creative Commons](#) licence will apply to this Work are set out in our licence referred to above.

Other than as permitted in any relevant BMJ Author's Self Archiving Policies, I confirm this Work has not been accepted for publication elsewhere, is not being considered for publication elsewhere and does not duplicate material already published. I confirm all authors consent to publication of this Work and authorise the granting of this licence.



1  
2  
3 **Preferences for Group Arts Therapies: A Cross-Sectional Survey of Mental Health Patients and the**  
4 **General Population**  
5  
6

7 Emma Millard<sup>1,2</sup>\*, Emma Medicott<sup>2</sup>, Jessica Cardona<sup>2</sup>, Stefan Priebe<sup>1</sup>, Catherine Carr<sup>1,2</sup>  
8  
9

10 <sup>1</sup>Unit for Social and Community Psychiatry, Queen Mary University of London, UK  
11

12 <sup>2</sup>East London NHS Foundation Trust, UK  
13  
14

15 \*Corresponding author: Emma Millard, Unit for Social and Community Psychiatry, Queen Mary  
16 University of London, Glen Road, E14 8SP, 020 7540 4380, [e.h.millard@qmul.ac.uk](mailto:e.h.millard@qmul.ac.uk)  
17  
18

19 Key words  
20

21 Arts therapies, preferences, psychiatry, survey  
22  
23

24 Word Count  
25

26 5,078  
27  
28  
29  
30  
31  
32  
33  
34  
35  
36  
37  
38  
39  
40  
41  
42  
43  
44  
45  
46  
47  
48  
49  
50  
51  
52  
53  
54  
55  
56  
57  
58  
59  
60

## Abstract

### *Objectives*

The arts therapies include music therapy, dance-movement therapy, art therapy and dramatherapy. Preferences for art forms may play an important role in engagement with treatment. This survey was an initial exploration of who is interested in group arts therapies, what they would choose, and why.

### *Design*

An online cross-sectional survey of demographics, interest in and preferences for the arts therapies was designed in collaboration with patients. The survey took 10 minutes to complete, including informed consent and 14 main questions. Summary statistics, multinomial logistic regression and thematic analysis were used to analyse the data.

### *Setting*

Thirteen NHS mental health trusts in the UK asked mental health patients and members of the general population to participate.

### *Participants*

A total of 1541 participants completed the survey; 685 mental health patients and 856 members of the general population. All participants were over 18 years old, had capacity to give informed consent and sufficient understanding of English. Mental health patients had to be using secondary mental health services.

### *Results*

Approximately 60% of participants would be interested in taking part in group arts therapies. Music therapy was the most frequent choice among mental health patients (41%) and art therapy was the most frequent choice in the general population (43%). Past experience of arts therapies was the most important predictor of preference for that same modality. Expectations of enjoyment, helpfulness, feeling capable, impact on mood, and social interaction were most often reported as reasons for preferring one form of arts therapy.

### *Conclusions*

1  
2  
3 Large proportions of the participants expressed an interest in group arts therapies. This may justify  
4 the wide provision of arts therapies and the offer of more than one modality to interested patients.  
5 It also highlights key considerations for assessment of preferences in the arts therapies as part of  
6 shared decision-making.  
7  
8  
9

### 10 Strengths and limitations of this study

- 13 • This is the largest survey of the arts therapies to date, and the only survey relating to  
14 preferences for the arts therapies.
- 15 • The survey's simple format made it accessible and recruitment was able to continue during  
16 the COVID-19 pandemic.
- 17 • The sampling technique may have led to some biases in the data.
- 18 • The survey results give insight into preferences when there were no consequences, future  
19 research should examine what patients choose when they are offered arts therapies as a  
20 treatment.  
21  
22  
23  
24  
25  
26  
27  
28  
29

### 30 Introduction

31  
32 The arts therapies is an umbrella term encompassing art therapy, music therapy, drama therapy and  
33 dance-movement therapy. They are a group of psychotherapeutic interventions which make use of  
34 specific art-forms. In the UK and several other countries, the arts therapies are delivered by qualified  
35 and regulated therapists, who draw on a number of different theoretical frameworks including  
36 psychodynamic, humanistic, attachment and person-centred approaches (1). There is a focus on the  
37 therapeutic relationship and exploration of the patient's feelings and experiences through active  
38 engagement with the art form (2). In a session, interactions are usually spontaneous, with the  
39 therapist responding to the feelings and reflections which arise in the moment. There are many  
40 different ways to use the creative art forms, although improvisation and playfulness are usually  
41 encouraged and supported (3). The primarily non-verbal approach makes the arts therapies suitable  
42 to work with patients who find verbal interaction difficult, such as those with learning disabilities,  
43 dementia or severe mental illness (4). Arts therapists work across many different settings, including  
44 as part of an arts therapies service, a multi-disciplinary team, or as lone-workers, and provide  
45 treatment both individually and in groups (5). In individual work, the therapeutic relationship  
46 between therapist and patient is key, in groups there is also an emphasis on supporting healthy  
47 interactions between group members (6). Mental health services in the UK often offer arts therapies  
48 in a group format as the experience of being in a group is well-understood to be helpful for people  
49  
50  
51  
52  
53  
54  
55  
56  
57  
58  
59  
60

1  
2  
3 with severe mental illness (7,8). In groups, the art forms offer a way for group members to connect  
4 with each other and the therapist on a non-verbal level (6,9,10).  
5

6  
7 Potential participants in the arts therapies will likely have had past experiences of the creative arts,  
8 whether that was at school or as hobbies (11). Therefore, their preferences and expectations may  
9 play a considerable role in their engagement and the success of therapy (12–14). Although the arts  
10 therapies share many features, including theoretical underpinning, there is a clear difference in the  
11 art form being used. In music therapy there are usually instruments to play, and patients may be  
12 encouraged to take part in singing, songwriting, listening or musical improvisation. Art therapists  
13 provide a space where patients can explore different art materials, including, but not limited to,  
14 drawing, collage, model-making or painting. In dramatherapy there may be opportunities to explore  
15 story-telling or role-play using acting or puppets. In dance-movement therapy patients would be  
16 encouraged to move their bodies, often to music, making use of props like scarves or ribbons (4).  
17  
18  
19  
20  
21  
22  
23  
24

25 The arts therapies have been around since the 1940s but until recently each arts modality has been  
26 considered distinct (15). An increased understanding of common factors in therapies has helped to  
27 conceptualise aspects that the arts therapies share, as well as differences between them (16–18).  
28 Historically, trials investigating the effectiveness of arts therapies have been small in number and  
29 poor in quality (19–27). When there is little evidence to distinguish the benefits or harms between  
30 treatment, it is recommended that treatment decisions are guided by patient preferences (28).  
31  
32  
33  
34  
35

36 Mental health patients' retrospective attitudes towards the arts therapies have been investigated by  
37 some; Heaney (1992) surveyed psychiatric inpatients about their experiences of treatment, focusing  
38 on arts therapies. The participants rated all of the therapies as favourable, with music therapy  
39 coming out top of being 'pleasurable'. All of the 'activity therapies' (music, art and recreation) in the  
40 study were considered to be of equal importance to other aspects of care (29). Silverman (2010)  
41 interviewed 15 inpatients about their perceptions of music therapy after they had attended sessions.  
42 Their feedback indicated a positive perception of their experiences and that they were able to recall  
43 features of the session (30). In a meta-synthesis of 14 studies of patient experiences of music  
44 therapy, it was found that there were four main areas which patients reported to be important;  
45 "having a good time", "being together", "feeling" and "being someone" (31). More recently, Haeyen  
46 and colleagues surveyed patients with a diagnosis of personality disorder who had attended art  
47 therapy. They found five key categories of experiences: Expression of emotions, improved self-  
48 image, making own choices/autonomy, insight and changing of personal patterns, and dealing with  
49 own limitations (32). This research into experiences offers understanding of patient values, and has  
50 potential to be associated with preferences and expectations for engagement with arts therapies.  
51  
52  
53  
54  
55  
56  
57  
58  
59  
60

1  
2  
3 No research to date has looked at who would be interested in taking part in group arts therapies,  
4 what their preferences would be and why. Given that preferences have been found to play an  
5 important role in engagement with psychosocial treatments, and the potential for the arts therapies  
6 to offer a space where patients can make choices and be autonomous, it seems pertinent to initiate  
7 a discussion about preferences in the arts therapies.  
8  
9

10  
11  
12 The current study was designed as an initial exploration of this topic. The research questions were:  
13

- 14 • Who is interested in participating in group arts therapies?
  - 15 • Which of the four arts modalities would people most like to take part in and why?
  - 16 • Which socio-demographic and clinical characteristics are related to preferences?
- 17  
18  
19

## 20 21 Method

22  
23 This study was given ethical approval by the South Central Oxford C Research Ethics Committee  
24 (18/SC/0701) and is reported according to recommended survey guidelines (33).  
25  
26

### 27 *Participants*

28  
29 All participants were required to be aged 18 or over, with sufficient command of the English  
30 language and capacity to give informed consent.  
31  
32

33  
34 NHS mental health trust sites became involved via the NIHR Clinical Research Network. Researchers  
35 at each site approached mental health group participants in secondary mental health services, such  
36 as inpatient wards and community mental health teams, to ask if they would like to take part.  
37  
38 Researchers could ask any other member of the public to complete the general population group  
39 survey, including family members and colleagues. Numbers of people who declined to take part  
40 were not recorded.  
41  
42  
43

### 44 *Patient and public involvement*

45  
46 The survey questions were developed in collaboration with patients and members of a multi-  
47 disciplinary research team. A draft of the analysis was read and commented on by the multi-  
48 disciplinary research team. Published results will be sent to the study sites to disseminate amongst  
49 their participants.  
50  
51  
52

### 53 *The survey*

54  
55 The survey was created by the authors; a validated survey was not available as this is the first time  
56 the topic has been researched. The questions were developed based on topics of interest in  
57  
58  
59  
60

1  
2  
3 collaboration with service users and a multi-disciplinary research team (see Appendices A and B for  
4 full surveys). Piloting of the survey was undertaken within the research team to ensure useability of  
5 the survey software, and with mental health patients and the general population in the main study  
6 site (n=200). No changes were required before expansion to further sites.  
7  
8  
9

10 The survey was completed electronically, in person via an ipad, or on participants' own devices  
11 whilst speaking to a researcher on the phone, and took approximately 10 minutes. The researchers  
12 were instructed to be present for the completion of the survey when possible, especially for mental  
13 health participants. There were 14 questions in the survey which focused on the participants'  
14 demographic characteristics and whether they had heard of the arts therapies, whether they would  
15 be interested in taking part, and which modality they would choose and why (as an open response).  
16 A short description of the arts therapies was included in the survey.  
17  
18  
19  
20  
21  
22

23 Mental health patients gave the researcher permission to access to their medical records to look for  
24 their diagnosis and length of time in services. Length of time in services was determined from the  
25 first clinical record on the patient's profile, or from self-reported first contact with mental health  
26 services. All responses were collected via an online platform, and researchers collected identifiable  
27 information (date of birth, diagnosis and time in services) for the mental health patients on a  
28 spreadsheet. This was anonymised and emailed to EM monthly, where the information was linked  
29 up to the online responses via a unique ID number.  
30  
31  
32  
33  
34  
35

36 Participants were given the chance to enter a £50 prize draw. They gave their personal information  
37 on a separate spreadsheet (mental health patients) or followed a link to a separate survey (general  
38 population) so that the survey responses remained anonymous.  
39  
40  
41

#### 42 *Data analysis*

43

44 All quantitative analysis was conducted in Stata V15 (34). Age groups, gender, ethnicity, level of  
45 education and time in services were collapsed into dichotomous variables. Summary statistics were  
46 used to look at the characteristics of participants. Chi<sup>2</sup> tests were conducted to look at differences  
47 between participant groups and to find variables of interest. These were entered into a multinomial  
48 logistic regression to look for significant characteristics related to interest in participating in the arts  
49 therapies, participants' preferred arts therapy modality, and the reasons they gave for their  
50 preferences. This was done firstly with all data together, then separately for each group of  
51 participants (mental health patients and general population). Missing data were excluded from  
52 analysis.  
53  
54  
55  
56  
57  
58  
59  
60

1  
2  
3 A subsample of reasons for preferences were coded and grouped into themes by EM using NVivo 12  
4 (35). These themes were then used as a framework to group together the remaining responses (EM,  
5 EMed and JC coded 33% each of all the open responses).  
6  
7

## 8 9 Results

10  
11 The total number of participants was 1541. Appendix C details the sample characteristics as broken  
12 down for analysis. There were some differences between the two groups, with a larger sample in the  
13 general population group (n=856) than in the mental health group (n=685). A significantly larger  
14 proportion of the general population were female (68%) and under 45 years old (62%) than in the  
15 mental health sample (49% female, 51% under 45). A significantly higher number of people in the  
16 general population were university educated (71%) than in the mental health sample (30%). A  
17 greater proportion of people in the mental health group had received talking therapies (74% vs  
18 45%). Higher numbers of people in the mental health group (42%) had attended arts therapies in the  
19 past than in the general population (12%). Levels of missing data were low for variables of interest  
20 (between 1-2%).  
21  
22

23  
24 Overall, 61.4% and 59.5% respectively of participants in the mental health group and the general  
25 population were interested in taking part in group arts therapies (see Table 1). The first regression  
26 model (see Appendix D) showed significant associations between interest in participating in the arts  
27 therapies and gender ( $p<0.001$ ), and previous attendance of arts therapies ( $p<0.001$ ): females were  
28 more likely than males to say they were interested in attending, as were those who had attended  
29 arts therapies before. Participants who had attended before were also less likely to say they were  
30 not sure.  
31  
32

33  
34 For the mental health patients, gender ( $p=0.05$ ), education level ( $p=0.01$ ), diagnosis ( $p=0.02$ ) and  
35 previous attendance of an arts therapy ( $p<0.001$ ) were significant variables: females and people who  
36 had attended before were more likely to say that they were interested, those with a diagnosis of F2  
37 or who were not university educated were more likely to say they were not interested in  
38 participating.  
39  
40

41  
42 In the general population sample, gender ( $p=0.01$ ), having heard of the arts therapies ( $p=0.03$ ) and  
43 attended the arts therapies ( $p=0.02$ ) were significant variables. Females and people who had heard  
44 of the arts therapies and attended arts therapies were more likely to say that they were interested.  
45 Those who had not attended were more likely to say they were not sure.  
46  
47  
48  
49  
50  
51  
52  
53  
54  
55  
56  
57  
58  
59  
60

Table 1: Attendance and interest

| Question                                                        | Response | Mental health patients (n=685) | General population sample (n=856) | Total (n=1541) |
|-----------------------------------------------------------------|----------|--------------------------------|-----------------------------------|----------------|
| Have you attended music therapy?*                               | Yes      | 117 (17.08%)                   | 44 (5.14%)                        | 161 (10.45%)   |
| Have you attended dance-movement therapy?*                      | Yes      | 59 (8.61%)                     | 24 (2.8%)                         | 83 (5.39%)     |
| Have you attended art therapy?*                                 | Yes      | 230 (33.58%)                   | 57 (6.66%)                        | 287 (18.62%)   |
| Have you attended dramatherapy?*                                | Yes      | 54 (7.88%)                     | 25 (2.92%)                        | 79 (5.13%)     |
| Attended none*                                                  | Yes      | 398 (58.1%)                    | 755 (88.2%)                       | 1153 (74.82%)  |
|                                                                 |          |                                |                                   |                |
| Would you be interested in taking part in group arts therapies? | Yes      | 420 (61.4%)                    | 509 (59.53%)                      | 929 (60.36%)   |
|                                                                 | No       | 165 (24.12%)                   | 179 (20.94%)                      | 344 (22.35%)   |
|                                                                 | Not sure | 99 (14.47%)                    | 167 (19.53%)                      | 266 (17.28%)   |

\* = significant differences between groups – Chi<sup>2</sup> at 5%

Participants were asked to choose one of the four modalities that they would most like to attend.

Table 2 shows a summary of the responses, and Figure 1 gives a graphical representation of the differences between groups.

Table 2: Most preferred arts therapies modality

| Question                        |                        | Mental health patients (n=685) | General population sample (n=856) | Total (n=1541) |
|---------------------------------|------------------------|--------------------------------|-----------------------------------|----------------|
| Which type would you MOST like? | Music therapy          | 282 (41.41%)                   | 271 (31.77%)                      | 553 (36.05%)   |
|                                 | Dance-movement therapy | 73 (10.72%)                    | 139 (16.3%)                       | 212 (13.82%)   |
|                                 | Art therapy            | 256 (37.59%)                   | 366 (42.91%)                      | 622 (40.55%)   |
|                                 | Dramatherapy           | 70 (10.28%)                    | 77 (9.03%)                        | 147 (9.58%)    |

When both groups were combined in the regression model (Appendix E), participant group ( $p=0.02$ ), gender ( $p<0.001$ ), previous attendance of music therapy ( $p<0.001$ ), dance-movement therapy ( $p=0.002$ ), art therapy ( $p<0.001$ ) and dramatherapy ( $p=0.002$ ) were all significantly associated with most preferred arts therapy modality. Significant variables for the mental health patients were gender ( $p<0.001$ ), whether someone was White British or BAME ( $p=0.05$ ) and previous attendance of music therapy ( $p<0.001$ ), dance-movement therapy ( $p=0.02$ ), art therapy ( $p<0.001$ ) and dramatherapy ( $p=0.01$ ). Significant variables for the general population sample were gender ( $p<0.001$ ) and previous attendance of music therapy ( $p=0.01$ ), dance-movement therapy ( $p=0.02$ ), art therapy ( $p=0.01$ ) and dramatherapy ( $p=0.02$ ). Significant characteristics for each modality are summarised in Table 3.



Table 3: Significant characteristics for preferences

| Most preferred type           | Most likely characteristics - both groups combined                                                                                                                                                            | Most likely characteristics - mental health patients                                                                                                                                                                  | Most likely characteristics - general population sample                                                                                                                     |
|-------------------------------|---------------------------------------------------------------------------------------------------------------------------------------------------------------------------------------------------------------|-----------------------------------------------------------------------------------------------------------------------------------------------------------------------------------------------------------------------|-----------------------------------------------------------------------------------------------------------------------------------------------------------------------------|
| <b>Music therapy</b>          | <ul style="list-style-type: none"> <li>• Males</li> <li>• Mental health patients</li> <li>• Attended music therapy before</li> <li>• Not attended art therapy</li> <li>• Not attended dramatherapy</li> </ul> | <ul style="list-style-type: none"> <li>• Males</li> <li>• BAME background</li> <li>• Attended music therapy before</li> <li>• Not attended art therapy</li> </ul>                                                     | <ul style="list-style-type: none"> <li>• Males</li> <li>• Attended music therapy before</li> <li>• Not attended art therapy</li> <li>• Not attended dramatherapy</li> </ul> |
| <b>Dance-movement therapy</b> | <ul style="list-style-type: none"> <li>• Females</li> <li>• Not heard of arts therapies before</li> <li>• Attended dance-movement therapy before</li> <li>• Not attended art therapy</li> </ul>               | <ul style="list-style-type: none"> <li>• Attended dance-movement therapy before</li> <li>• Not attended art therapy</li> </ul>                                                                                        | <ul style="list-style-type: none"> <li>• Female</li> <li>• Attended music therapy before</li> <li>• Attended dance-movement therapy before</li> </ul>                       |
| <b>Art therapy</b>            | <ul style="list-style-type: none"> <li>• Females</li> <li>• General population sample</li> <li>• Attended art therapy before</li> </ul>                                                                       | <ul style="list-style-type: none"> <li>• Females</li> <li>• Attended art therapy before</li> </ul>                                                                                                                    | <ul style="list-style-type: none"> <li>• Female</li> <li>• Attended art therapy before</li> </ul>                                                                           |
| <b>Dramatherapy</b>           | <ul style="list-style-type: none"> <li>• Males</li> <li>• Attended dramatherapy before</li> </ul>                                                                                                             | <ul style="list-style-type: none"> <li>• Males</li> <li>• White British background</li> <li>• Not heard of arts therapies</li> <li>• Attended music therapy before</li> <li>• Attended dramatherapy before</li> </ul> | <ul style="list-style-type: none"> <li>• None</li> </ul>                                                                                                                    |

### Reasons for preferences

Participants were asked why they had chosen their most preferred arts modality with an open response box. These answers were grouped into seven main themes; enjoyment, expectations of helpfulness, feeling capable, impact on mood, creating something, social interaction and the unknown (see Table 4 for counts).

Table 4: Counts of themes

| Theme                       | Most like |       |
|-----------------------------|-----------|-------|
|                             | N         | %     |
| Enjoyment                   | 578       | 38.05 |
| Expectations of helpfulness | 294       | 19.35 |
| Feeling capable             | 228       | 15.01 |
| Impact on mood              | 197       | 12.97 |
| Creating something          | 67        | 4.41  |
| Social interaction          | 61        | 4.02  |
| The unknown                 | 34        | 2.24  |

These themes were also entered into a regression model to look for associations between the reasons participants gave for their preferences and their characteristics. The regression model with all categories was not a good fit because of low numbers in some of the categories. In order to create a good fit, the four categories which had the fewest responses were grouped together and named 'other'. In the bar charts, the results were kept in their original, wider, categories.

The regression model (Appendix F) for the reasons given by the full sample showed that gender ( $p=0.05$ ) (Figure 2), level of education ( $p<0.001$ ) (Figure 3), age group ( $p=0.004$ ) (Figure 4), interest in taking part ( $p=0.01$ ) (Figure 5) and most preferred modality ( $p<0.001$ ) (Figure 6) were significant factors. When the mental health group and the general population were analysed separately, their most preferred modality ( $p<0.001$ ) was the only variable significantly associated with the reason given for this.

## Themes

### *Enjoyment*

Enjoyment and pleasure were mentioned often. Participants sometimes related their enjoyment of the art form to previous experiences such as at school or using the art forms as hobbies. Many people said they had a personal interest in an art form and that is why they would choose it. They expected that using the art form would be fun.

*"I like to make music and have a studio at home"* (Ppt0045: Music therapy)

*"Done it before and enjoyed it, benefited from it"* (Ppt0303: Art therapy)

### *Expectations of helpfulness*

Participants often gave a reason related to how helpful they expected that arts modality to be for them. This was sometimes due to the therapeutic benefit they thought they may gain from using that art form, as well as being able to use the art form to express themselves.

1  
2  
3 *“Exercise and movement help with my depression”* (Ppt0270: Dance-movement therapy)

4  
5  
6 *“Because I know that when you draw/paint, you are in touch with a childlike part of yourself.*  
7 *Therefore I think it could be useful, particularly in conjunction with talking about the*  
8 *problem. Art taps into unconscious processes”* (Ppt0767: Art therapy)

#### 11 *Feeling capable*

12  
13  
14 Some people preferred an arts modality because they felt that they were good at it, possibly  
15 because of past experience or a natural talent. Others said they would feel more comfortable using  
16 an art form because they believed there was no need to be good at it.

17  
18  
19  
20 *“I think I’d make a good actor”* (Ppt0224: Dramatherapy)

21  
22 *“Because it’s something anyone can do with any skill level. No judgement, it’s what you feel*  
23 *and what drives you to put down on paper. For me it settles my head and evens me out.”*  
24  
25 (Ppt0620: Art therapy)

#### 26 27 28 *Impact on mood*

29  
30  
31 Participants spoke about how an art form may be relaxing for them or that it cheers them up. This  
32 was expected to be through different methods of engaging with the art form, including listening to  
33 calming music, the benefits of doing exercise, or just the joy of being creative.

34  
35  
36  
37 *“Because of the interaction, when you listen to music your mood improves as well. You get*  
38 *better. When you listen to different types of music your moods gets better all the time too.”*  
39  
40 (Ppt0295: Music therapy)

41  
42  
43 *“Dance would relax me and help to maintain fitness”* (Ppt1300: Dance-movement therapy)

#### 44 45 *Creating something*

46  
47  
48 The theme of creating something encapsulated when participants said that the creativity, or  
49 producing something, would draw them to a modality. This was most often mentioned in relation to  
50 art therapy.

51  
52  
53 *“I enjoy the quite methodical work that goes into producing a piece of artwork and having a*  
54 *visual representation to have and keep”* (Ppt1330: Art therapy)

55  
56  
57 *“I like the thought of being creative and making things.”* (Ppt1410: Art therapy)

#### 58 59 *Social interaction*

1  
2  
3 Some participants said that they would choose their preferred modality because it would give them  
4 a chance to be with others and socialise. It seemed that art therapy was considered a less 'sociable'  
5 modality, as each person works on their own piece of art; this was a positive thing for many people.  
6  
7

8  
9 *"I believe it would involve the greatest amount of independent working without interaction*  
10 *with others."* (Ppt0788: Art therapy)  
11

12  
13 *"I think because I'm expressive, I'm comfortable in front of other people and being able to be*  
14 *silly boosts your self-esteem and is good for my mental health"* (Ppt1206: Dramatherapy)  
15  
16

### 17 *The unknown*

18  
19 Participants gave 'not knowing' about a modality as a reason for why they might like to take part.  
20 For example, some said they would like to try it as it was something new, or that they would like to  
21 learn a new skill.  
22  
23

24  
25 *"Sounds relaxing and something that I have never done before and the other three are my*  
26 *hobbies already. Would like to get better at art."* (Ppt1124: Art therapy)  
27  
28

29  
30 *"Never learnt an instrument and would want to muck around within one"* (Ppt1130: Music  
31 therapy)  
32  
33

34 In summary of the bar charts, it seems that males are more likely to place value on enjoyment and  
35 feeling capable than females, whereas females are more likely to speak about expectations of  
36 helpfulness than males when giving reasons for their preferences. Those who were not university  
37 educated, and people over the age of 45 put more emphasis on enjoyment than others. Enjoyment  
38 and impact on mood were more commonly mentioned for music therapy than for the other  
39 modalities, whereas expectations of helpfulness seemed more relevant for people who chose dance-  
40 movement or dramatherapy. Feeling capable was a key consideration for people who chose  
41 dramatherapy as their preferred modality, and creating something was more important for those  
42 who chose art therapy than the other modalities.  
43  
44  
45  
46  
47  
48  
49

### 50 Discussion

51  
52 To our knowledge, this is the largest survey of the arts therapies ever undertaken. The results show  
53 who would be interested in group arts therapies, what they would want, and why. A relatively high  
54 proportion of people both in mental health services and in the general population would be  
55 interested in participating (around 60%). However, when looking at the proportion of those using  
56 mental health services who had accessed arts therapies, this number was much lower (42%).  
57  
58  
59  
60

1  
2  
3 Receiving a preferred psychosocial treatment is associated with lower dropout rates (12), and the  
4 results of this survey suggest that there is the potential for arts therapies to be more widely offered,  
5 to increase engagement with treatment. It is unknown how many Trusts in the UK provide an arts  
6 therapies service, but of the sites in this survey the number was 4 out of 13 (31%). This may not be  
7 representative of arts therapies provision across the UK. We would recommend that research is  
8 conducted to ascertain this information.  
9  
10  
11  
12

13  
14 The results indicate that preferences in the survey were heavily informed by past experiences of  
15 using that art form. The most consistent and clinically relevant predictors of preferences were  
16 previous experiences of the same type of arts therapy. A conceptual review of resource-oriented  
17 therapeutic models in psychiatry highlighted how utilising the experiences and knowledge of the  
18 patient, in particular to identify what has helped them in the past, is a key component of solution-  
19 focused therapy (36). This suggests that an understanding of patients' past experiences of the arts  
20 should form an integral part of the shared decision-making process.(12)  
21  
22  
23  
24  
25

26  
27 Art and music therapy were the most preferred modalities overall. There are a number of potential  
28 explanations for this, other than them being truly more popular. Although we do not know actual  
29 provision of arts therapies in mental health services, far more people in the survey had heard of and  
30 attended art therapy and music therapy than the other two modalities. As demonstrated by the  
31 regression model, those who have attended a modality before are more likely to choose it as their  
32 preference; this held true for every modality and both participant groups. Therefore, the lower  
33 numbers of people choosing dance-movement and dramatherapy could be due to the lower  
34 availability of these modalities. It could also be argued that music and art are more 'mainstream' art  
35 forms, which most people use in their day to day lives and therefore feel more comfortable with.  
36  
37  
38  
39  
40  
41

42  
43 Another potential reason for this split is a misunderstanding of the implications of taking part in  
44 dance-movement and dramatherapy. Zajonc suggests that people are able to express preferences  
45 based on very limited information, by adhering to their past experiences and set of values (37) and  
46 many participants spoke about their past experiences of the arts, such as at school or as hobbies.  
47 Participants in this questionnaire were not informed about what the arts therapies involve, and the  
48 open responses highlighted some misconceptions. This underlines the need for clinicians to address  
49 concerns during informed decision making processes.  
50  
51  
52  
53  
54

55  
56 In line with proposed common active factors, this survey found that pleasure and enjoyment are  
57 important for arts therapies preferences (38). It has been suggested that people making non-  
58 consequential decisions will do so on the basis of mental pleasure, or to minimise mental  
59  
60

1  
2  
3 displeasure (39). In the arts therapies, pleasure and playfulness may be more important than in  
4 other forms of therapy (2), as there is an emphasis on using creativity to explore different cognitive  
5 or emotional experiences (16,32). Fun and enjoyment are also mentioned as factors in qualitative  
6 studies of patient experiences of arts therapies (40,41).  
7  
8  
9

10 It was important to participants to consider how the art form might be helpful for them, such as  
11 being inherently therapeutic, or a way to express themselves. This is in line with literature on the  
12 construction of preferences; people consider the pros and cons of the options and how they may  
13 benefit from them (42). Expectations of how a therapy might be helpful also play a crucial role in  
14 engagement and process (13). Patients and therapists must believe that the therapy will help them  
15 in order to make positive change (17).  
16  
17  
18  
19  
20

21 Other reasons for preferences revolved around an impact on mood. In previous studies, changes in  
22 mood have been highlighted as key outcomes for people who attend the arts therapies (20,43–45)  
23 and this seemed particularly important for people who chose music therapy as their preference.  
24 Social interaction was also important consideration for participants in the survey (16). Being  
25 together in a group has been found to be a key mechanism of change for patients attending music  
26 therapy (31,46), therefore consideration of the group dynamics is pertinent.  
27  
28  
29  
30  
31

32 It is essential to remember that any decisions about engagement with the arts therapies should be  
33 made in collaboration with a healthcare professional, within the context of a shared decision-making  
34 approach (47,48). The reasons which participants gave in this study point towards the aspects of arts  
35 therapies treatment which could influence their preferences. Although past experiences are a key  
36 consideration, it may be appropriate to encourage a patient to try something new, depending on  
37 their situation. The healthcare professional should be prepared to state the aims and goals of the  
38 arts therapies so that patients have more information than only their own past experiences. Decision  
39 aids, including taster sessions, for the arts therapies could be helpful in supporting patients to make  
40 an informed choice (11).  
41  
42  
43  
44  
45  
46  
47

#### 48 Strengths and limitations

49

50  
51 The simplicity of the survey meant it was popular with NHS sites and online access meant  
52 recruitment was able to continue during the COVID-19 pandemic. As the study was the first of its  
53 kind, the approach was exploratory and a sample size calculation was not deemed appropriate. The  
54 sampling technique may have led to some bias, and there were some significant difference between  
55 participant groups (mental health patients and general population). Researchers asked people in  
56 their own networks for the general population sample. This is likely to be the cause of the high levels  
57  
58  
59  
60

1  
2  
3 of education seen in the general population sample and potentially higher numbers of female  
4 participants, as many were employed by the mental health service involved in the study (27% of  
5 general population participants). It was necessary to recruit participants in this way for pragmatic  
6 reasons, however, ideally the general population sample would be more representative. We also did  
7 not ask the general population sample whether they were mental health patients, so the groups may  
8 not have been mutually exclusive, which is a limitation of the study. In multivariable analysis, it is  
9 recommended that the sample size should be at least 10 times the number of variables considered  
10 (49); this was the case with our sample, suggesting that the associations are reliable.  
11  
12

13  
14  
15  
16  
17 Reasons for liking something can be difficult to verbalise (37) and participants in the current study  
18 sometimes gave limited responses to the open questions. This could have been influenced by the  
19 short nature of the survey and the environment in which it was being answered, e.g. in a waiting  
20 room or shopping centre, or over the phone. A more in-depth understanding of the choices that  
21 participants made could be ascertained through individual interviews. If this research were to be  
22 conducted, the themes drawn out from the open questions in this study could provide a framework  
23 for topic guides. This survey focused on group arts therapies, whereas the results may have been  
24 different for individual therapy. There could be scope for linking these reasons for preferences to  
25 personality characteristics such as openness and extraversion (50), however this was not within the  
26 remit of this study. In hindsight, it would have been interesting to know whether participants' past  
27 experiences of the arts therapies were in groups or individually, however this question was not  
28 included in the survey because it did not seem relevant to the research question at the time.  
29  
30  
31  
32  
33  
34  
35  
36  
37

38  
39 Given the large number of tests conducted in this study, it would be expected that 5% of the  
40 significant results were due to chance, as they were not corrected for multiple testing. It is also  
41 important to consider the difference between statistical significance and clinical relevance. Many of  
42 the associations found in this study will not highlight clinically relevant findings. To account for this,  
43 significant associations have not been given undue weight and the most relevant to clinical contexts  
44 have been explored further.  
45  
46  
47  
48

49  
50 Zaller suggested that survey responses seem to be random and not necessarily linked to participants'  
51 preferences (51). In the current study, participants were 'forced' to choose one modality as their  
52 preference. There was no option to say 'none' or 'all'. This may have created an unrealistic  
53 representation of true preferences. Participants were aware that there were no consequences to  
54 their preferences; they would not have to participate in the groups. They were also not given any  
55 information about the arts therapies, other than one sentence embedded in the survey. If someone  
56 was expressing a preference as part of their treatment pathway, they would be given more  
57  
58  
59  
60

1  
2  
3 information (11). They would also be given more time to think about their decision and discuss with  
4 a mental health professional as part of a shared decision-making process (52). Therefore, the  
5 responses in this survey may not translate into actual behaviour. Future research should focus on  
6 'real life' preferences of those who are taking part in the arts therapies and whether preferences  
7 and expectations are associated with engagement.  
8  
9

## 10 11 12 Conclusion

13  
14  
15 This is the first study to investigate who would be interested in taking part in group arts therapies  
16 and what their preferences would be. Two thirds of participants said they would be interested in  
17 participating. Relevant characteristics for interest and preferences were varied, but previous  
18 experience of the arts therapies was consistently associated with a preference for the same  
19 modality. The findings may justify the wide provision of arts therapies and the offer of more than  
20 one modality to interested patients. They also highlight key topics to consider when supporting  
21 people to make informed decisions about engaging with the arts therapies as part of a shared  
22 decision-making process.  
23  
24  
25  
26  
27  
28

29 We would recommend that further research is undertaken to ascertain current arts therapies  
30 provision in mental health services in the UK, as well as a more in-depth understanding of the impact  
31 of preferences on arts therapies engagement in both research and clinical settings.  
32  
33  
34

## 35 Contributorship statement

36  
37 The study was planned and designed by Emma Millard, Catherine Carr and Stefan Priebe. Data  
38 collection was conducted by Emma Millard and researchers at each NHS site. Data preparation and  
39 analysis was undertaken by Emma Millard, Emma Medlicott and Jessica Cardona. Write up and  
40 editing was undertaken by all authors, with Emma Millard taking the lead.  
41  
42  
43  
44

## 45 Funding statement

46  
47 This work was funded by East London NHS Foundation Trust as part of a PhD studentship.  
48  
49

## 50 Competing interests

51  
52 None  
53  
54

## 55 Acknowledgements

56  
57 With thanks to the ERA Study Lived Experience Advisory Panel for their advice, and all NHS Trusts  
58 involved: Barnet, Enfield and Haringey, Camden and Islington, Cornwall Partnership, Devon  
59  
60



1  
2  
3 Partnership, ELFT, Lancashire Care, Mersey Care, NELFT, North West Boroughs, Oxford Health,  
4  
5 Somerset Partnership, Southern Health, and West London.

#### 6 7 Exclusive licence

8  
9  
10 I, the Submitting Author has the right to grant and does grant on behalf of all authors of the Work  
11 (as defined in the below author licence), an exclusive licence and/or a non-exclusive licence for  
12 contributions from authors who are: i) UK Crown employees; ii) where BMJ has agreed a CC-BY  
13 licence shall apply, and/or iii) in accordance with the terms applicable for US Federal Government  
14 officers or employees acting as part of their official duties; on a worldwide, perpetual, irrevocable,  
15 royalty-free basis to BMJ Publishing Group Ltd (“BMJ”) its licensees and where the relevant Journal is  
16 co-owned by BMJ to the co-owners of the Journal, to publish the Work in BMJ Open and any other  
17 BMJ products and to exploit all rights, as set out in our licence.  
18  
19  
20  
21  
22

#### 23 24 Data sharing

25  
26 Unpublished, anonymised data would be made available upon reasonable request.  
27  
28

#### 29 30 Ethics statement

31  
32 This study was given ethical approval by the South Central Oxford C Research Ethics Committee  
33 (18/SC/0701).  
34  
35

#### 36 37 References

- 38  
39  
40  
41  
42  
43  
44  
45  
46  
47  
48  
49  
50  
51  
52  
53  
54  
55  
56  
57  
58  
59  
60
1. Karkou V, Sanderson P. Arts therapies: A research-based map of the field. Edinburgh: Elsevier; 2006.
  2. Cattanach A. Process in the Arts Therapies. London: Jessica Kingsley; 1999.
  3. Jones P. The Arts Therapies: A Revolution in Healthcare. 2nd ed. Oxon: Routledge; 2021.
  4. Odell-Miller H, Hughes P, Westacott M. An investigation into the effectiveness of the arts therapies for adults with continuing mental health problems. Psychotherapy Research. 2006;16(1):122–39.
  5. Jones P. The Arts Therapies: A Revolution in Healthcare. 2nd ed. Oxon: Routledge; 2020.
  6. Davies A, Richards E, Barwick N. Group music therapy: A group analytic approach. London: Routledge; 2015.
  7. Foulkes SH, Pines M. Selected Papers: Psychoanalysis and Group Analysis. London: H. Karnac (Books) Ltd; 1990.
  8. Bion WR. Experiences in groups. Human Relations. 1948;1(3):314–20.

- 1  
2  
3 9. Carr C, Feldtkeller B, French J, Huet V, Karkou V, Priebe S. What makes us the same? What  
4 makes us different? Development of a shared model and manual of group therapy practice  
5 across art therapy, dance movement therapy and music therapy within community mental  
6 health care. *The Arts in Psychotherapy*. Elsevier Ltd; 2020. 101747.
- 7  
8  
9 10. Jones P. *The Arts Therapies: A Revolution in Healthcare*. 2nd ed. Oxon: Routledge; 2020.
- 10  
11 11. Millard E, Hounsell L, Fernandes J, Jakku M, Boast K, Church O, et al. How do you know what  
12 you want? Service user views on decision aids for the arts therapies. *The Arts in*  
13 *Psychotherapy* [Internet]. 2021;73(January). Available from:  
14 <https://doi.org/10.1016/j.aip.2021.101757>
- 15  
16  
17 12. Windle E, Tee H, Sabitova A, Jovanovic N, Priebe S, Carr C. Association of patient treatment  
18 preference with dropout and clinical outcomes in adult psychosocial mental health  
19 interventions: A systematic review and meta-analysis. *JAMA Psychiatry*. 2019;1–9.
- 20  
21  
22 13. Arnkoff DB, Glass CR, Shapiro SJ, Arnkoff DB, Shapiro SJ, Glass CR, et al. Expectations and  
23 preferences. In: Norcross JC, editor. *Psychotherapy: Theory, research, practice, training*.  
24 Oxford University Press; 2002. p. 335–56.
- 25  
26  
27 14. Swift JK, Callahan JL, Cooper M, Parkin SR. The impact of accommodating client preference in  
28 psychotherapy: A meta-analysis. *Journal of Clinical Psychology* [Internet]. 2018;74(11):1924–  
29 37. Available from: <http://doi.wiley.com/10.1002/jclp.22680>
- 30  
31  
32 15. Hogan S. *Healing Arts: The History of Art Therapy*. Philadelphia: Jessica Kingsley; 2001.
- 33  
34  
35 16. Carr C, Feldtkeller B, French J, Huet V, Karkou V, Priebe S. What makes us the same? What  
36 makes us different? Development of a shared model and manual of group therapy practice  
37 across art therapy, dance movement therapy and music therapy within community mental  
38 health care. *The Arts in Psychotherapy* [Internet]. 2020;(December). Available from:  
39 <https://doi.org/10.1016/j.aip.2020.101747>
- 40  
41  
42 17. Wampold B, Imel ZE. *The great psychotherapy debate*. 2nd ed. New York: Routledge; 2015.
- 43  
44  
45 18. Priebe S, Conneely M, McCabe R, Bird V. What can clinicians do to improve outcomes across  
46 psychiatric treatments: a conceptual review of non-specific components. *Epidemiology and*  
47 *Psychiatric Sciences*. 2019;1–8.
- 48  
49  
50 19. Baker F, Metcalf O, Varker T, O'Donnell M. A systematic review of the efficacy of creative arts  
51 therapies in the treatment of adults with PTSD. *Psychological Trauma: Theory, Research,*  
52 *Practice, and Policy*. 2018;10(6):643–51.
- 53  
54  
55 20. Aalbers S, Fusar-Poli L, Freeman RE, Spreen M, Ket JC, Vink AC, et al. Music therapy for  
56 depression. *Cochrane Database of Systematic Reviews*. 2017;
- 57  
58  
59 21. Geretsegger M, Ka M, Xj C, To H, Gold C. Music therapy for people with schizophrenia and  
60 schizophrenia-like disorders. *Cochrane Database of Systematic Reviews*. 2017;(5).

- 1
- 2
- 3 22. Deshmukh S, Holmes J, Cardno A. Art therapy for people with dementia. *Cochrane Database*
- 4 *of Systematic Reviews*. 2018;(9).
- 5
- 6 23. Ruddy R, Milnes D. Art therapy for schizophrenia or schizophrenia-like illnesses. 2005;(4):4–6.
- 7
- 8 24. Meekums B, Karkou V, Ea N, Meekums B, Karkou V, Nelson EA. Dance movement therapy for
- 9 depression. 2016;(2).
- 10
- 11 25. Ren J, Xia J. Dance therapy for schizophrenia. *Cochrane Database of Systematic Reviews*.
- 12 2013;(10):10–2.
- 13
- 14 26. Karkou V, Meekums B. Dance movement therapy for dementia. *Cochrane Database of*
- 15 *Systematic Reviews*. 2017;2017(2).
- 16
- 17 27. Ruddy R, Dent-brown K. Drama therapy for schizophrenia or schizophrenia-like illnesses.
- 18 *Cochrane Database of Systematic Reviews*. 2007;(1).
- 19
- 20 28. Coulter A, Ellins J. Effectiveness of strategies for informing, educating, and involving patients.
- 21 *British Medical Journal*. 2007;335(7609):24–7.
- 22
- 23 29. Heaney CJ. Evaluation of music therapy and other treatment modalities by adult psychiatric
- 24 inpatients. *Journal of Music Therapy*. 1992;29(2):70–86.
- 25
- 26 30. Silverman MJ. Perceptions of music therapy interventions from inpatients with severe mental
- 27 illness: A mixed-methods approach. *Arts in Psychotherapy*. 2010;37(3):264–8.
- 28
- 29 31. Solli HP, Rolvsjord R, Borg M. Toward understanding music therapy as a recovery-oriented
- 30 practice within mental health care: A meta-synthesis of service users' experiences. *Journal of*
- 31 *Music Therapy*. 2013;50(4):244–73.
- 32
- 33 32. Haeyen S, Chakhssi F, van Hooren S. Benefits of Art Therapy in People Diagnosed With
- 34 Personality Disorders: A Quantitative Survey. *Frontiers in Psychology*. 2020;11(April):1–8.
- 35
- 36 33. Kelley K, Clark B, Brown V, Sitzia J. Good practice in the conduct and reporting of survey
- 37 research. *International Journal for Quality in Health Care*. 2003;15(3):261–6.
- 38
- 39 34. StataCorp. Stata statistical software. College Station, TX: StataCorp LLC; 2017.
- 40
- 41 35. QSR International Pty Ltd. NVivo qualitative data analysis software. Version 12. 2018.
- 42
- 43 36. Priebe S, Omer S, Giacco D, Slade M. Resource-oriented therapeutic models in psychiatry:
- 44 Conceptual review. *British Journal of Psychiatry*. 2014;204(4):256–61.
- 45
- 46 37. Zajonc R. Feeling and Thinking Preferences Need No Inference. *American Psychologist*.
- 47 1980;35(2):151–75.
- 48
- 49 38. Koch SC. Arts and health: Active factors and a theory framework of embodied aesthetics. *Arts*
- 50 *in Psychotherapy* [Internet]. 2017;54:85–91. Available from:
- 51 <http://dx.doi.org/10.1016/j.aip.2017.02.002>
- 52
- 53
- 54
- 55
- 56
- 57
- 58
- 59
- 60

- 1
- 2
- 3
- 4 39. Cabanac M, Guillaume J, Balasko M, Fleury A. Pleasure in decision-making situations. 2002;15:1–15.
- 5
- 6
- 7 40. Windle E, Hickling LM, Jayacodi S, Carr C. The Experiences of Patients in the Synchrony Group
- 8 Music Therapy Trial for Long-term Depression. *The Arts in Psychotherapy* [Internet].
- 9 2019;67(101580). Available from: <https://doi.org/10.1016/j.aip.2019.101580>
- 10
- 11 41. Brady C, Moss H, Kelly BD. A fuller picture: Evaluating an art therapy programme in a
- 12 multidisciplinary mental health service. 2017;30–4.
- 13
- 14 42. Slovic P. The construction of preference. *American Psychologist*. 1995;
- 15
- 16 43. de Petrillo L, Winner E. Does art improve mood? a test of a key assumption underlying art
- 17 therapy. *Art Therapy*. 2005;22(4):205–12.
- 18
- 19 44. McKinney CH, Honig TJ. Health outcomes of a series of bonny method of guided imagery and
- 20 music sessions: A systematic review. *Journal of Music Therapy*. 2017;54(1):1–34.
- 21
- 22 45. Bell CE, Robbins SJ. Effect of art production on negative mood: A randomized, controlled trial.
- 23 *Art Therapy*. 2007;24(2):71–5.
- 24
- 25 46. Windle E, Hickling LM, Jayacodi S, Carr C. The Experiences of Patients in the Synchrony Group
- 26 Music Therapy Trial for Long-term Depression. *The Arts in Psychotherapy*. 2019;
- 27
- 28 47. Edwards A, Elwyn G. Shared decision-making in health care: Achieving evidence-based
- 29 patient choice [Internet]. Oxford: Oxford University Press; 2009. Available from:
- 30 [https://ebookcentral-proquest-com.ezproxy.library.qmul.ac.uk/lib/gmul-](https://ebookcentral-proquest-com.ezproxy.library.qmul.ac.uk/lib/gmul-ebooks/reader.action?docID=975640#)
- 31 [ebooks/reader.action?docID=975640#](https://ebookcentral-proquest-com.ezproxy.library.qmul.ac.uk/lib/gmul-ebooks/reader.action?docID=975640#)
- 32
- 33 48. Slade M. Implementing shared decision making in routine mental health care. *World*
- 34 *Psychiatry*. 2017;16(2):146–53.
- 35
- 36 49. Sekaran U, Bougie R. *Research methods for business*. Chichester: John Wiley & Sons Ltd;
- 37 2016.
- 38
- 39 50. Kaplan SC, Levinson CA, Rodebaugh TL, Menatti A, Weeks JW. Social anxiety and the big five
- 40 personality traits: The interactive relationship of trust and openness [Internet]. Vol. 44,
- 41 *Cognitive Behaviour Therapy*. Taylor & Francis; 2015. p. 212–22. Available from:
- 42 <http://dx.doi.org/10.1080/16506073.2015.1008032>
- 43
- 44 51. Zaller J, Feldman S. A simple theory of the survey response: Answering questions versus
- 45 revealing preferences. *American Journal of Political Science*. 1992;36(3):579–616.
- 46
- 47 52. Duncan E, Best C, Hagen S, Duncan E, Best C, Hagen S. Shared decision making interventions
- 48 for people with mental health conditions. *Cochrane Database of Systematic Reviews*
- 49 [Internet]. 2010; Available from: <https://www.ncbi.nlm.nih.gov/pmc/articles/PMC7209977/>
- 50
- 51
- 52
- 53
- 54
- 55
- 56
- 57
- 58
- 59
- 60

1  
2  
3 Figure 1: Most preferred arts therapies modality divided by participant group  
4

5 Figure 2: Bar chart of association between reason given and gender  
6

7 Figure 3: Bar chart of association between reason given and level of education  
8

9 Figure 4: Bar chart of association between reason given and age group  
10

11 Figure 5: Bar chart of association between reason given and interest in participating in group arts  
12 therapies  
13

14  
15 Figure 6: Bar chart of association between reason given and most preferred modality  
16  
17  
18  
19  
20  
21  
22  
23  
24  
25  
26  
27  
28  
29  
30  
31  
32  
33  
34  
35  
36  
37  
38  
39  
40  
41  
42  
43  
44  
45  
46  
47  
48  
49  
50  
51  
52  
53  
54  
55  
56  
57  
58  
59  
60

For peer review only

1  
2  
3  
4  
5  
6  
7  
8  
9  
10  
11  
12  
13  
14  
15  
16  
17  
18  
19  
20  
21  
22  
23  
24  
25  
26  
27  
28  
29  
30  
31  
32  
33  
34  
35  
36  
37  
38  
39  
40  
41  
42  
43  
44  
45  
46  
47  
48  
49  
50  
51  
52  
53  
54  
55  
56  
57  
58  
59  
60



Figure 1: Most preferred arts therapies modality divided by participant group

1812x1328mm (47 x 47 DPI)

1  
2  
3  
4  
5  
6  
7  
8  
9  
10  
11  
12  
13  
14  
15  
16  
17  
18  
19  
20  
21  
22  
23  
24  
25  
26  
27  
28  
29  
30  
31  
32  
33  
34  
35  
36  
37  
38  
39  
40  
41  
42  
43  
44  
45  
46  
47  
48  
49  
50  
51  
52  
53  
54  
55  
56  
57  
58  
59  
60



Figure 2: Bar chart of association between reason given and gender

1812x1328mm (47 x 47 DPI)

1  
2  
3  
4  
5  
6  
7  
8  
9  
10  
11  
12  
13  
14  
15  
16  
17  
18  
19  
20  
21  
22  
23  
24  
25  
26  
27  
28  
29  
30  
31  
32  
33  
34  
35  
36  
37  
38  
39  
40  
41  
42  
43  
44  
45  
46  
47  
48  
49  
50  
51  
52  
53  
54  
55  
56  
57  
58  
59  
60



Figure 3: Bar chart of association between reason given and level of education

1812x1328mm (47 x 47 DPI)



1  
2  
3  
4  
5  
6  
7  
8  
9  
10  
11  
12  
13  
14  
15  
16  
17  
18  
19  
20  
21  
22  
23  
24  
25  
26  
27  
28  
29  
30  
31  
32  
33  
34  
35  
36  
37  
38  
39  
40  
41  
42  
43  
44  
45  
46  
47  
48  
49  
50  
51  
52  
53  
54  
55  
56  
57  
58  
59  
60



Figure 4: Bar chart of association between reason given and age group

1812x1328mm (47 x 47 DPI)



Figure 5: Bar chart of association between reason given and interest in participating in group arts therapies

1812x1328mm (47 x 47 DPI)



Figure 6: Bar chart of association between reason given and most preferred modality

1817x1328mm (47 x 47 DPI)

## Appendix A: Mental health patients survey questions

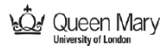

### Preferences for the Arts Therapies - MH Group Ex

#### Page 1: Information Sheet

##### Preferences for the Arts Therapies

We would like to invite you to participate in a study. Before you decide to take part in this study you need to understand why the research is being done and what it would involve. Please take time to read the following information carefully and feel free to email the researcher to ask questions if you wish.

##### What is the purpose of the study?

This study has been designed to collect information about what people know about the arts therapies and which modality they would choose if they were seeking treatment.

##### What will the study involve?

Once you have read this information sheet, you will be asked to give your consent to take part in the study. You will also be asked to give consent for the researcher to access your medical records. Your diagnosis and length of time using mental health services will be recorded and stored separately to your survey answers – linked by a unique ID number.

It will take around 5-10 minutes to complete the questionnaire.

If you take part, there will be the opportunity to enter a prize draw to win a £50 shopping voucher. To do this you will need to provide your name and contact number. This information will be stored separately to your questionnaire responses.

##### Do I have to take part?

1 / 18

any time.

##### Who is sponsoring and funding the research?

Queen Mary University of London is sponsoring this research and it is funded by East London NHS Foundation Trust.

##### Who has reviewed this study?

The Research Ethics Committee of South Central - Oxford C Research Ethics Committee have approved this study (REC.18/SC/0701).

##### What will happen with the results of the study?

The results of the study will be submitted for publication in a peer-reviewed journal, and be a part of the researcher's PhD thesis.

##### What if there is a problem?

If you have any concerns about this study, you should speak to the researcher who is completing the survey with you.

Or you can speak to the Chief Investigator, Emma Windle, who can be reached at [e.h.windle@qmul.ac.uk](mailto:e.h.windle@qmul.ac.uk).

If you wish to complain formally, you can do this by contacting the Patient Advisory Liaison Service (PALS):

Queen Mary University of London has agreed that if you are harmed as a result of your participation in the study, you will be compensated, provided that, on the balance of probabilities, an injury was caused as a direct result of the intervention or procedures you received during the course of the study. These special compensation arrangements apply where an injury is caused to you that would not have occurred if you were not in the trial. These arrangements do not affect your right to pursue a claim through legal action.

3 / 18

You do not have to take part in this study. You are free to decide not to take part and you can change your mind at any point whilst completing the survey. After submitting your answers you can no longer withdraw.

##### What happens to my personal information?

Queen Mary University of London is the sponsor for this study based in the United Kingdom. We will be using information from you in order to undertake this study and will act as the data controller for this study. This means that we are responsible for looking after your information and using it properly. Identifiable information will be kept within your NHS Trust and shared without identifiers with QMUL.

Your rights to access, change or move your information are limited, as we need to manage your information in specific ways in order for the research to be reliable and accurate. If you withdraw from the study, we will keep the information about you that we have already obtained. To safeguard your rights, we will use the minimum personally-identifiable information possible.

You can find out more about how we use your information at <http://www.arcs.qmul.ac.uk/media/arcs/policyzone/Privacy-Notice-for-Research-Participants.pdf>

Your NHS Trust will collect information from you for this research study in accordance with their instructions.

Your Trust will keep your name and contact details confidential and will not pass this information to Queen Mary University of London. The Trust will use this information as needed, to contact you about the research study and to oversee the quality of the study. Certain individuals from Queen Mary University of London and regulatory organisations may look at your research records to check the accuracy of the research study. Queen Mary University of London will only receive information without any identifying information. The people who analyse the information will not be able to identify you and will not be able to find out your name or contact details.

##### What are the possible benefits of taking part?

There is no immediate benefit to taking part in this research. You will be helping us to gain an understanding of people's attitudes towards the arts therapies.

##### What are the possible disadvantages of taking part?

This is a brief survey and we believe that it is safe for you to take part. However, if you feel uncomfortable or decide you do not want to participate, you can stop the survey at

2 / 18

#### Page 2: Consent Form

I confirm that I have read and understood the information sheet for the 'Preferences about the Arts Therapies'. I have been given the opportunity to ask questions.

I understand that the study involves completing a short questionnaire about my perspectives of the arts therapies.

I understand that my participation is voluntary and that I can withdraw at any time by closing the browser. Once I have submitted my answers I can no longer withdraw from the study.

I agree that the research team can access my clinical records to find out more about my mental health diagnosis and treatment history.

I understand that all information will be kept confidential and any personal details will be anonymised. I understand that confidentiality may need to be broken if there is a concern for risk to other people or to myself.

I agree to take part in the above study. \* Required

Yes  
 No

I agree for the research team to access my clinical records to find out more about my mental health diagnosis and treatment history. \* Required

Yes  
 No

Date \* Required

4 / 18

Dates need to be in the format 'DD/MM/YYYY', for example 27/03/1960.

(dd/mm/yyyy)

Page 3: To be completed by the researcher

Name of site

Patient ID

5 / 18

6 / 18

Page 4

What is your gender?

Male  
 Female  
 Other  
 Prefer not to say

7 / 18

Page 5

What is your ethnic group? Choose one option that best describes your ethnic group or background

White - English/Welsh/Scottish/Northern Irish/British  
 White - Irish  
 White - Gypsy or Irish Traveller  
 White - Any other White background, please describe  
 Mixed/multiple ethnic groups - White and Black Caribbean  
 Mixed/multiple ethnic groups - White and Black African  
 Mixed/multiple ethnic groups - White and Asian  
 Mixed/multiple ethnic groups - Any other Mixed/Multiple ethnic background, please describe  
 Asian/Asian British - Indian  
 Asian/Asian British - Pakistani  
 Asian/Asian British - Bangladeshi  
 Asian/Asian British - Chinese  
 Asian/Asian British - Any other Asian background, please describe  
 Black/ African/Caribbean/Black British - African  
 Black/ African/Caribbean/Black British - Caribbean  
 Black/ African/Caribbean/Black British - Any other Black/African/Caribbean background, please describe  
 Other ethnic group - Arab  
 Other ethnic group - Any other ethnic group, please describe  
 Prefer not to say

If you selected Other, please specify:

8 / 18

1  
2  
3  
4  
5  
6  
7  
8  
9  
10  
11  
12  
13  
14  
15  
16  
17  
18  
19  
20  
21  
22  
23  
24  
25  
26  
27  
28  
29  
30  
31  
32  
33  
34  
35  
36  
37  
38  
39  
40  
41  
42  
43  
44  
45  
46  
47  
48  
49  
50  
51  
52  
53  
54  
55  
56  
57  
58  
59  
60

Page 6

What level of education have you completed?

- Primary school (up to age 11)
- Secondary school (up to age 16)
- College (up to age 18)
- University (18+)
- Prefer not to say

9 / 18

Page 7

Have you ever received talking therapy (e.g. cognitive behavioural therapy, psychotherapy, counselling)?

- Yes
- No
- Prefer not to say

Was this individual or group therapy?

- Individual
- Group
- Both
- Prefer not to say

10 / 18

Page 8

Many people use different art forms therapeutically to support their mental wellbeing. The 'arts therapies' involve the use of creative art forms as a mode of expression and communication, supported by an accredited arts therapist. There are four main types of arts therapies; music therapy, dance-movement therapy, art therapy and dramatherapy.

11 / 18

Page 9

Would you be interested in taking part in group arts therapies?

- Yes
- No
- Not sure

12 / 18

Page 10

Please tick the relevant boxes (can be more than one):  
Please don't select more than 5 answer(s) per row.  
Please select at least 2 answer(s).

|                                                              | Music therapy            | Dance-movement therapy   | Art therapy              | Dramatherapy             | None                     | Other                    |
|--------------------------------------------------------------|--------------------------|--------------------------|--------------------------|--------------------------|--------------------------|--------------------------|
| Which arts therapies have you heard of before?               | <input type="checkbox"/> |
| Have you ever attended any of these types of arts therapies? | <input type="checkbox"/> |

If other, please give details:

13 / 18

Page 11

Please choose **one** modality for each of these questions:  
Please don't select more than 1 answer(s) per row.  
Please select at least 2 answer(s).

|                                                  | Music therapy            | Dance-movement therapy   | Art therapy              | Dramatherapy             |
|--------------------------------------------------|--------------------------|--------------------------|--------------------------|--------------------------|
| Which type would you MOST like to take part in?  | <input type="checkbox"/> | <input type="checkbox"/> | <input type="checkbox"/> | <input type="checkbox"/> |
| Which type would you LEAST like to take part in? | <input type="checkbox"/> | <input type="checkbox"/> | <input type="checkbox"/> | <input type="checkbox"/> |

14 / 18

Page 12

Why would you most like to take part in [CHOOSE\_1]?

Why would you least like to take part in [CHOOSE\_2]?

15 / 18

Page 13: Thank you for taking part in this survey

Would you like to be entered into a prize draw to win £50 of shopping vouchers?

- Yes
- No

If yes, the researcher will record your name and contact details.

16 / 18

Page 14

Would you like to be contacted about future opportunities to be involved in research?

- Yes
- No

If yes, the researcher will record your contact details.

Page 15

Thank you for taking the time to complete this survey.

If you have any questions or concerns, please email Emma Windle:  
e.h.windle@qmul.ac.uk.

If you would like to know more about the arts therapies, please follow this link:

<https://www.youtube.com/watch?v=GMR5vV1PJM0>



17 / 18

18 / 18

Peer review only



## Appendix B: General population survey questions

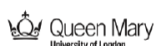

### Preferences for the Arts Therapies - Pop group Ex

#### Page 1: Information Sheet

##### Preferences for the Arts Therapies

We would like to invite you to participate in a study. Before you decide to take part in this study you need to understand why the research is being done and what it would involve. Please take time to read the following information carefully and feel free to email the researcher to ask questions if you wish.

##### What is the purpose of the study?

This study has been designed to collect information about what people know about the arts therapies and which modality they would choose if they were seeking treatment.

##### What will the study involve?

Once you have read this information sheet, you will be asked to give your consent to take part in the study. It will take around 5-10 minutes to complete the questionnaire.

If you take part, there will be the opportunity to enter a prize draw to win a £50 shopping voucher. To do this you will need to provide your name and contact number. This information will be stored separately to your questionnaire responses.

##### Do I have to take part?

You do not have to take part in this study. You are free to decide not to take part and you can drop out at any time without giving a reason. To withdraw from the study, just close the browser window without submitting your answers. If you have any questions about the study you can speak to the researcher (Emma Windle) or email her later at: e.h.windle@qmul.ac.uk.

1 / 20

##### What happens to my personal information?

Queen Mary University of London is the sponsor for this study based in the United Kingdom. We will be using information from you in order to undertake this study and will act as the data controller for this study. This means that we are responsible for looking after your information and using it properly. Identifiable information will be kept within the NHS Trust site and shared without identifiers with QMUL.

Your rights to access, change or move your information are limited, as we need to manage your information in specific ways in order for the research to be reliable and accurate. If you withdraw from the study, we will keep the information about you that we have already obtained. To safeguard your rights, we will use the minimum personally-identifiable information possible.

You can find out more about how we use your information at <http://www.arcs.qmul.ac.uk/media/arcs/policyzone/Privacy-Notice-for-Research-Participants.pdf>

The NHS Trust will collect information from you for this research study in accordance with our instructions.

The NHS Trust will keep your name and contact details confidential and will not pass this information to Queen Mary University of London. The Trust will use this information as needed, to contact you about the research study and to oversee the quality of the study. Certain individuals from Queen Mary University of London and regulatory organisations may look at your research records to check the accuracy of the research study. Queen Mary University of London will only receive information without any identifying information. The people who analyse the information will not be able to identify you and will not be able to find out your name or contact details.

##### What are the possible benefits of taking part?

There is no immediate definite benefit to taking part in this research. You will be helping us to gain an understanding of people's attitudes towards the arts therapies.

##### What are the possible disadvantages of taking part?

This is a brief survey and we believe that it is safe for you to take part. However, if you feel uncomfortable or decide you do not want to participate, you can stop the questionnaire at any time.

##### Who is sponsoring and funding the research?

2 / 20

Queen Mary University of London is sponsoring this research and it is funded by East London NHS Foundation Trust (ELFT).

##### Who has reviewed this study?

The Research Ethics Committee of South Central - Oxford C Research Ethics Committee have approved this study (REC:18/SC/0701).

##### What will happen with the results of the study?

The results of the study will be submitted for publication in a peer-reviewed journal, and be a part of the Chief Investigator's (CI) PhD thesis.

##### What if there is a problem?

If you have any concerns about this study, you should speak to the researcher.

Or contact Emma Windle (CI), who can be reached at e.h.windle@qmul.ac.uk.

If you wish to complain formally, you can do this by contacting the Patient Advisory Liaison Service (PALS):

Queen Mary University of London has agreed that if you are harmed as a result of your participation in the study, you will be compensated, provided that, on the balance of probabilities, an injury was caused as a direct result of the intervention or procedures you received during the course of the study. These special compensation arrangements apply where an injury is caused to you that would not have occurred if you were not in the trial. These arrangements do not affect your right to pursue a claim through legal action.

3 / 20

#### Page 2: Consent Form

I confirm that I have read and understood the information sheet for the 'Preferences for the Arts Therapies'. I have been given the opportunity to ask questions.

I understand that the study involves completing a short questionnaire about my perspectives of the arts therapies.

I understand that my participation is voluntary and that I can withdraw at any time by closing the browser. Once I have submitted my answers I can no longer withdraw from the study.

I understand that all information will be kept confidential and any personal details will be anonymised. I understand that confidentiality may need to be broken if there is a concern for risk to other people or to myself.

I agree to take part in the above study. \* Required

Yes  
 No

Date \* Required

Dates need to be in the format 'DDMMYYYY', for example 27/03/1980.

(dd/mm/yyyy)

4 / 20

## Page 3: To be completed by the researcher

Site name \* Required

Participant ID \* Required

5 / 20

## Page 4: Questionnaire

What is your year of birth?

6 / 20

## Page 5

What is your gender?

 Male  
 Female  
 Other  
 Prefer not to say

7 / 20

## Page 6

What is your ethnic group? Choose one option that best describes your ethnic group or background

 White - English/Welsh/Scottish/Northern Irish/British  
 White - Irish  
 White - Gypsy or Irish Traveller  
 White - Any other White background, please describe  
 Mixed/multiple ethnic groups - White and Black Caribbean  
 Mixed/multiple ethnic groups - White and Black African  
 Mixed/multiple ethnic groups - White and Asian  
 Mixed/multiple ethnic groups - Any other Mixed/Multiple ethnic background, please describe  
 Asian/Asian British - Indian  
 Asian/Asian British - Pakistani  
 Asian/Asian British - Bangladeshi  
 Asian/Asian British - Chinese  
 Asian/Asian British - Any other Asian background, please describe  
 Black/ African/Caribbean/Black British - African  
 Black/ African/Caribbean/Black British - Caribbean  
 Black/ African/Caribbean/Black British - Any other Black/African/Caribbean background, please describe  
 Other ethnic group - Arab  
 Other ethnic group - Any other ethnic group, please describe  
 Prefer not to say

If you selected Other, please specify:

8 / 20

Page 7

What level of education have you completed?

- Primary school (up to age 11)
- Secondary school (up to age 16)
- College (up to age 18)
- University (18+)
- Prefer not to say

9 / 20

Page 8

Have you ever received talking therapy (e.g. cognitive behavioural therapy, psychotherapy, counselling)?

- Yes
- No
- Prefer not to say

Was this individual or group therapy?

- Individual
- Group
- Both
- Prefer not to say

10 / 20

Page 9

Are you currently employed by mental health services?

- Yes
- No
- Prefer not to say

If yes, in which category do you work?

11 / 20

Page 10

Many people use different art forms therapeutically to support their mental wellbeing. The 'arts therapies' involve the use of creative art forms as a mode of expression and communication, supported by an accredited arts therapist. There are four main types of arts therapies; music therapy, dance-movement therapy, art therapy and dramatherapy.

12 / 20

peer review

1  
2  
3  
4  
5  
6  
7  
8  
9  
10  
11  
12  
13  
14  
15  
16  
17  
18  
19  
20  
21  
22  
23  
24  
25  
26  
27  
28  
29  
30  
31  
32  
33  
34  
35  
36  
37  
38  
39  
40  
41  
42  
43  
44  
45  
46  
47  
48  
49  
50  
51  
52  
53  
54  
55  
56  
57  
58  
59  
60

Page 11

If you were seeking help for psychological problems would you be interested in taking part in group arts therapies?

- Yes
- No
- Not sure

13 / 20

Page 12

Please tick the relevant boxes (can be more than one):

Please don't select more than 5 answer(s) per row.

Please select at least 2 answer(s).

|                                                              | Music therapy            | Dance-movement therapy   | Art therapy              | Dramatherapy             | None                     | Other                    |
|--------------------------------------------------------------|--------------------------|--------------------------|--------------------------|--------------------------|--------------------------|--------------------------|
| Which arts therapies have you heard of before?               | <input type="checkbox"/> |
| Have you ever attended any of these types of arts therapies? | <input type="checkbox"/> |

If other, please give details:

14 / 20

Page 13

Please choose **one** modality for each of these questions:

Please don't select more than 1 answer(s) per row.

Please select at least 2 answer(s).

|                                                  | Music therapy            | Dance-movement therapy   | Art therapy              | Dramatherapy             |
|--------------------------------------------------|--------------------------|--------------------------|--------------------------|--------------------------|
| Which type would you MOST like to take part in?  | <input type="checkbox"/> | <input type="checkbox"/> | <input type="checkbox"/> | <input type="checkbox"/> |
| Which type would you LEAST like to take part in? | <input type="checkbox"/> | <input type="checkbox"/> | <input type="checkbox"/> | <input type="checkbox"/> |

15 / 20

Page 15: Thank you for taking part in this survey

Would you like to be entered into a prize draw to win £50 of shopping vouchers?

- Yes
- No

If yes, please follow this link to enter your contact details:

<https://qmul.onlinesurveys.ac.uk/prize-draw-entry>

17 / 20

Page 16

Would you like to be contacted about future opportunities to be involved in research?

Yes

No

If yes, please follow this link to enter your contact details:

<https://qmul.onlinesurveys.ac.uk/contact-details-for-future-research>

Page 17

Thank you for taking the time to complete this survey.

If you have any questions or concerns, please email Emma Windle: [e.h.windle@qmul.ac.uk](mailto:e.h.windle@qmul.ac.uk).

If you would like to know more about the arts therapies, please follow this link:

<https://www.youtube.com/watch?v=GMR5vV1PJM0>



Key for selection options

9.a - If yes, in which category do you work?

- Medical
- Nursing
- Allied health professional
- Support staff
- Administrative
- Carer
- Other

18 / 20

19 / 20

peer review only

1  
2  
3  
4  
5  
6  
7  
8  
9  
10  
11  
12  
13  
14  
15  
16  
17  
18  
19  
20  
21  
22  
23  
24  
25  
26  
27  
28  
29  
30  
31  
32  
33  
34  
35  
36  
37  
38  
39  
40  
41  
42  
43  
44  
45  
46  
47  
48  
49  
50  
51  
52  
53  
54  
55  
56  
57  
58  
59  
60

## Appendix C: Sample characteristics

| Characteristic                                  |                                                             | Mental health patients (n=685) | General population sample (n=856) | Total (n=1541) |
|-------------------------------------------------|-------------------------------------------------------------|--------------------------------|-----------------------------------|----------------|
| Gender*                                         | Male                                                        | 343 (50.15%)                   | 271 (31.73%)                      | 614 (39.92%)   |
|                                                 | Female                                                      | 334 (48.83%)                   | 581 (68.03%)                      | 915 (59.49%)   |
|                                                 | Other                                                       | 7 (1.02%)                      | 2 (0.23%)                         | 9 (0.59%)      |
| Ethnic group                                    | White British                                               | 489 (73.20%)                   | 600 (72.46%)                      | 1089 (72.79%)  |
|                                                 | BAME                                                        | 179 (26.80%)                   | 228 (28.54%)                      | 407 (27.21%)   |
| Age group*                                      | Under 45                                                    | 316 (50.72%)                   | 526 (61.96%)                      | 842 (57.2%)    |
|                                                 | Over 45                                                     | 307 (49.28%)                   | 323 (38.04%)                      | 630 (42.8%)    |
| Level of education*                             | Not university educated                                     | 474 (70.01%)                   | 244 (28.94%)                      | 718 (47.24%)   |
|                                                 | University educated                                         | 203 (29.99%)                   | 599 (71.06%)                      | 802 (52.76%)   |
| Diagnosis                                       | F20-F29 Schizophrenia, schizotypal and delusional disorders | 283 (43.61%)                   |                                   |                |
|                                                 | F30-F39 Mood (affective) disorders                          | 177 (27.27%)                   |                                   |                |
|                                                 | Other (F0-F19, F40-F99)                                     | 189 (29.12%)                   |                                   |                |
| Time in services                                | Less than 8 years                                           | 328 (53.51%)                   |                                   |                |
|                                                 | More than 8 years                                           | 285 (46.49%)                   |                                   |                |
| Part of a Trust with an arts therapies service? |                                                             | 234 (37.34%)                   |                                   |                |
| Received a talking therapy?*                    |                                                             | 504 (74.34%)                   | 386 (45.41%)                      | 890 (58.25%)   |

\* = significant differences between groups – Chi<sup>2</sup> at 5%

## Appendix D: Multinomial Logistic Regression Results: Would you be interested in taking part in group arts therapies? (Yes as base outcome)

| Participants                      | Would you be interested?       | Variable                            | RRR                      | Std. error | 95% CI |      |      |
|-----------------------------------|--------------------------------|-------------------------------------|--------------------------|------------|--------|------|------|
| All (n=1510)                      | Yes                            | (Base outcome)                      |                          |            |        |      |      |
|                                   | No                             | Mental health or General population | 0.89                     | 0.14       | 0.66   | 1.19 |      |
|                                   |                                | Male or female*                     | 0.56                     | 0.07       | 0.43   | 0.72 |      |
|                                   |                                | Not uni or uni                      | 0.90                     | 0.13       | 0.68   | 1.19 |      |
|                                   |                                | Heard of arts therapies             | 0.72                     | 0.12       | 0.51   | 1.00 |      |
|                                   |                                | Attended arts therapies*            | 0.53                     | 0.10       | 0.37   | 0.76 |      |
|                                   | Not sure                       | Mental health or General population | 1.04                     | 0.18       | 0.74   | 1.45 |      |
|                                   |                                | Male or female                      | 0.98                     | 0.15       | 0.73   | 1.32 |      |
|                                   |                                | Not uni or uni                      | 1.13                     | 0.18       | 0.83   | 1.55 |      |
|                                   |                                | Heard of arts therapies             | 1.02                     | 0.21       | 0.68   | 1.52 |      |
|                                   |                                | Attended arts therapies*            | 0.42                     | 0.09       | 0.28   | 0.64 |      |
|                                   | Mental health patients (n=651) | Yes                                 | (Base outcome)           |            |        |      |      |
|                                   |                                | No                                  | Male or female*          | 0.61       | 0.12   | 0.41 | 0.91 |
|                                   |                                |                                     | Not uni or uni*          | 0.61       | 0.14   | 0.38 | 0.97 |
|                                   |                                |                                     | Diagnosis F3             | 0.79       | 0.19   | 0.49 | 1.27 |
| Diagnosis Other*                  |                                |                                     | 0.51                     | 0.13       | 0.31   | 0.84 |      |
| Heard of arts therapies           |                                |                                     | 1.06                     | 0.27       | 0.64   | 1.73 |      |
| Not sure                          |                                | Attended arts therapies*            | 0.49                     | 0.11       | 0.31   | 0.76 |      |
|                                   |                                | Male or female                      | 0.89                     | 0.22       | 0.55   | 1.44 |      |
|                                   |                                | Not uni or uni                      | 1.63                     | 0.41       | 0.99   | 2.67 |      |
|                                   |                                | Diagnosis F3                        | 1.66                     | 0.49       | 0.93   | 2.97 |      |
|                                   |                                | Diagnosis Other                     | 1.00                     | 0.31       | 0.55   | 1.84 |      |
| General population sample (n=850) |                                | Yes                                 | (Base outcome)           |            |        |      |      |
|                                   |                                | No                                  | Male or female*          | 0.60       | 0.11   | 0.42 | 0.86 |
|                                   |                                |                                     | Not uni or uni           | 1.20       | 0.24   | 0.81 | 1.78 |
|                                   |                                |                                     | Heard of arts therapies* | 0.54       | 0.13   | 0.34 | 0.86 |
|                                   | Attended arts therapies*       |                                     | 0.44                     | 0.17       | 0.21   | 0.92 |      |
|                                   | Not sure                       | Male or female                      | 1.04                     | 0.21       | 0.70   | 1.55 |      |
|                                   |                                | Not uni or uni                      | 0.92                     | 0.18       | 0.62   | 1.36 |      |
|                                   |                                | Heard of arts therapies             | 0.96                     | 0.27       | 0.55   | 1.67 |      |
|                                   |                                | Attended arts therapies*            | 0.51                     | 0.17       | 0.26   | 1.00 |      |

RRR=relative risk, CI=confidence interval, \*=significant variables at 5%

## Appendix E: Multinomial Logistic Regression Results: Which type would you MOST prefer? (Art therapy as base outcome)

| Participants                    | Type                              | Variable                             | RRR                    | Std. error | 95% CI |       |      |
|---------------------------------|-----------------------------------|--------------------------------------|------------------------|------------|--------|-------|------|
| All<br>(n=1505)                 | Music therapy                     | Mental health or General population* | 0.68                   | 0.10       | 0.51   | 0.91  |      |
|                                 |                                   | Male or female*                      | 0.43                   | 0.06       | 0.33   | 0.55  |      |
|                                 |                                   | White British or BAME                | 1.30                   | 0.19       | 0.98   | 1.74  |      |
|                                 |                                   | Not uni or uni                       | 0.81                   | 0.11       | 0.61   | 1.06  |      |
|                                 |                                   | Heard of arts therapies              | 1.06                   | 0.19       | 0.75   | 1.50  |      |
|                                 |                                   | Attended music therapy*              | 4.77                   | 1.30       | 2.80   | 8.12  |      |
|                                 |                                   | Attended dance-movement therapy      | 1.38                   | 0.51       | 0.66   | 2.85  |      |
|                                 |                                   | Attended art therapy*                | 0.26                   | 0.06       | 0.17   | 0.40  |      |
|                                 |                                   | Attended dramatherapy*               | 0.48                   | 0.17       | 0.23   | 0.98  |      |
|                                 | Dance-movement therapy            | Mental health or General population  | 1.15                   | 0.24       | 0.77   | 1.72  |      |
|                                 |                                   | Male or female*                      | 1.61                   | 0.32       | 1.09   | 2.38  |      |
|                                 |                                   | White British or BAME                | 1.39                   | 0.26       | 0.96   | 2.01  |      |
|                                 |                                   | Not uni or uni                       | 1.04                   | 0.20       | 0.72   | 1.51  |      |
|                                 |                                   | Heard of arts therapies*             | 0.62                   | 0.14       | 0.39   | 0.97  |      |
|                                 |                                   | Attended music therapy               | 1.34                   | 0.52       | 0.62   | 2.88  |      |
|                                 |                                   | Attended dance-movement therapy*     | 4.41                   | 1.78       | 2.00   | 9.72  |      |
|                                 |                                   | Attended art therapy*                | 0.56                   | 0.15       | 0.33   | 0.95  |      |
|                                 | Art therapy                       | (Base outcome)                       |                        |            |        |       |      |
|                                 | Dramatherapy                      | Mental health or General population  | 0.87                   | 0.20       | 0.56   | 1.37  |      |
|                                 |                                   | Male or female *                     | 0.52                   | 0.10       | 0.35   | 0.76  |      |
|                                 |                                   | White British or BAME*               | 1.54                   | 0.33       | 1.01   | 2.34  |      |
|                                 |                                   | Not uni or uni                       | 1.22                   | 0.26       | 0.80   | 1.86  |      |
|                                 |                                   | Heard of arts therapies              | 0.62                   | 0.16       | 0.37   | 1.04  |      |
|                                 |                                   | Attended music therapy               | 1.95                   | 0.75       | 0.91   | 4.16  |      |
|                                 |                                   | Attended dance-movement therapy      | 1.62                   | 0.77       | 0.64   | 4.10  |      |
|                                 |                                   | Attended art therapy                 | 0.75                   | 0.22       | 0.43   | 1.32  |      |
|                                 | Mental health patients<br>(n=667) | Music therapy                        | Attended dramatherapy* | 2.35       | 0.88   | 1.13  | 4.88 |
|                                 |                                   |                                      | Male or female *       | 0.39       | 0.08   | 0.27  | 0.57 |
| White British or BAME*          |                                   |                                      | 1.72                   | 0.40       | 1.10   | 2.70  |      |
| Not uni or uni                  |                                   |                                      | 0.79                   | 0.17       | 0.51   | 1.21  |      |
| Interested in arts therapies    |                                   |                                      | 1.07                   | 0.14       | 0.83   | 1.38  |      |
| Heard of arts therapies         |                                   |                                      | 0.99                   | 0.25       | 0.60   | 1.64  |      |
| Attended music therapy*         |                                   |                                      | 5.38                   | 1.82       | 2.77   | 10.45 |      |
| Attended dance-movement therapy |                                   |                                      | 1.22                   | 0.54       | 0.51   | 2.92  |      |
| Attended art therapy*           |                                   |                                      | 0.27                   | 0.07       | 0.17   | 0.44  |      |
| Attended dramatherapy           | 0.73                              | 0.33                                 | 0.31                   | 1.76       |        |       |      |



|                                   |                        |                                  |      |      |      |       |
|-----------------------------------|------------------------|----------------------------------|------|------|------|-------|
|                                   | Dance-movement therapy | Male or female                   | 1.14 | 0.34 | 0.64 | 2.04  |
|                                   |                        | White British or BAME            | 1.84 | 0.59 | 0.98 | 3.45  |
|                                   |                        | Not uni or uni                   | 1.61 | 0.48 | 0.90 | 2.88  |
|                                   |                        | Interested in arts therapies     | 0.76 | 0.16 | 0.51 | 1.14  |
|                                   |                        | Heard of arts therapies          | 0.60 | 0.22 | 0.29 | 1.23  |
|                                   |                        | Attended music therapy           | 0.53 | 0.31 | 0.17 | 1.69  |
|                                   |                        | Attended dance-movement therapy* | 5.00 | 2.68 | 1.74 | 14.32 |
|                                   |                        | Attended art therapy*            | 0.50 | 0.17 | 0.25 | 0.98  |
|                                   |                        | Attended dramatherapy            | 2.18 | 1.13 | 0.79 | 6.04  |
|                                   | Art therapy            | (Base outcome)                   |      |      |      |       |
|                                   | Dramatherapy           | Male or female *                 | 0.35 | 0.11 | 0.20 | 0.64  |
|                                   |                        | White British or BAME*           | 1.99 | 0.65 | 1.05 | 3.79  |
|                                   |                        | Not uni or uni                   | 1.38 | 0.44 | 0.74 | 2.58  |
|                                   |                        | Interested in arts therapies     | 0.67 | 0.15 | 0.42 | 1.05  |
|                                   |                        | Heard of arts therapies*         | 0.43 | 0.17 | 0.20 | 0.92  |
|                                   |                        | Attended music therapy*          | 2.58 | 1.23 | 1.02 | 6.55  |
|                                   |                        | Attended dance-movement therapy  | 1.88 | 1.05 | 0.63 | 5.59  |
|                                   |                        | Attended art therapy             | 0.64 | 0.23 | 0.31 | 1.30  |
|                                   |                        | Attended dramatherapy*           | 3.10 | 1.50 | 1.20 | 8.01  |
| General population sample (n=850) | Music therapy          | Male or female *                 | 0.43 | 0.07 | 0.30 | 0.60  |
|                                   |                        | Attended music therapy*          | 4.32 | 2.13 | 1.65 | 11.35 |
|                                   |                        | Attended dance-movement therapy  | 2.21 | 1.67 | 0.50 | 9.75  |
|                                   |                        | Attended art therapy*            | 0.21 | 0.11 | 0.08 | 0.58  |
|                                   |                        | Attended dramatherapy*           | 0.15 | 0.12 | 0.03 | 0.74  |
|                                   | Dance-movement therapy | Male or female *                 | 1.66 | 0.42 | 1.00 | 2.74  |
|                                   |                        | Attended music therapy*          | 3.39 | 1.76 | 1.22 | 9.40  |
|                                   |                        | Attended dance-movement therapy* | 7.05 | 4.58 | 1.98 | 25.15 |
|                                   |                        | Attended art therapy             | 0.47 | 0.22 | 0.19 | 1.19  |
|                                   | Art therapy            | Attended dramatherapy            | 0.29 | 0.21 | 0.07 | 1.20  |
|                                   | Dramatherapy           | Male or female                   | 0.67 | 0.18 | 0.39 | 1.14  |
|                                   |                        | Attended music therapy           | 0.44 | 0.40 | 0.08 | 2.57  |
|                                   |                        | Attended dance-movement therapy  | 1.56 | 1.47 | 0.25 | 9.93  |
|                                   |                        | Attended art therapy             | 1.27 | 0.63 | 0.48 | 3.35  |
|                                   |                        | Attended dramatherapy            | 1.90 | 1.12 | 0.59 | 6.06  |

RRR=relative risk, CI=confidence interval, \*=significant variables at 5%

## Appendix F: Multinomial Logistic Regression Results for Reasons Given for Most Preferred Modality

| Participants      | Reason                              | Variable                             | RRR  | Std. error | 95% CI |      |
|-------------------|-------------------------------------|--------------------------------------|------|------------|--------|------|
|                   | Enjoyment (n=578)                   | (Base outcome)                       |      |            |        |      |
| All (n=1519)      | Expectations of helpfulness (n=294) | Mental health or general population  | 0.97 | 0.19       | 0.67   | 1.42 |
|                   |                                     | Male or female                       | 1.18 | 0.20       | 0.84   | 1.65 |
|                   |                                     | University educated or not*          | 1.59 | 0.28       | 1.13   | 2.23 |
|                   |                                     | Under or over 45                     | 0.81 | 0.13       | 0.59   | 1.10 |
|                   |                                     | Attended talking therapy             | 0.84 | 0.14       | 0.61   | 1.17 |
|                   |                                     | Interested in taking part – no*      | 0.64 | 0.13       | 0.42   | 0.95 |
|                   |                                     | Interested in taking part – not sure | 0.66 | 0.15       | 0.42   | 1.01 |
|                   |                                     | Attended arts therapies              | 1.00 | 0.38       | 0.47   | 2.13 |
|                   |                                     | Attended art therapy                 | 1.33 | 0.55       | 0.60   | 2.98 |
|                   |                                     | Most prefer art therapy*             | 1.63 | 0.40       | 1.00   | 2.65 |
|                   |                                     | Most prefer dance-movement therapy*  | 2.11 | 0.41       | 1.43   | 3.09 |
|                   |                                     | Most prefer dramatherapy*            | 2.79 | 0.81       | 1.58   | 4.95 |
|                   |                                     | Least prefer art therapy             | 0.88 | 0.25       | 0.50   | 1.53 |
|                   |                                     | Least prefer dance-movement therapy  | 0.90 | 0.30       | 0.47   | 1.72 |
|                   | Least prefer dramatherapy           | 0.94                                 | 0.26 | 0.55       | 1.60   |      |
|                   | Feeling capable (n=228)             | Mental health or general population  | 0.88 | 0.18       | 0.59   | 1.32 |
|                   |                                     | Male or female*                      | 0.67 | 0.12       | 0.47   | 0.96 |
|                   |                                     | University educated or not*          | 1.91 | 0.36       | 1.33   | 2.76 |
|                   |                                     | Under or over 45                     | 1.21 | 0.21       | 0.87   | 1.69 |
|                   |                                     | Attended talking therapy             | 0.75 | 0.13       | 0.53   | 1.07 |
|                   |                                     | Interested in taking part - no       | 1.09 | 0.22       | 0.74   | 1.62 |
|                   |                                     | Interested in taking part – not sure | 0.91 | 0.21       | 0.58   | 1.42 |
|                   |                                     | Attended arts therapies              | 0.97 | 0.39       | 0.45   | 2.12 |
|                   |                                     | Attended art therapy                 | 0.77 | 0.34       | 0.33   | 1.82 |
|                   |                                     | Most prefer art therapy*             | 0.54 | 0.17       | 0.29   | 1.01 |
|                   |                                     | Most prefer dance-movement therapy   | 1.46 | 0.29       | 0.99   | 2.16 |
|                   |                                     | Most prefer dramatherapy*            | 2.20 | 0.65       | 1.23   | 3.93 |
|                   |                                     | Least prefer art therapy             | 0.82 | 0.26       | 0.44   | 1.53 |
|                   |                                     | Least prefer dance-movement therapy  | 0.87 | 0.32       | 0.42   | 1.80 |
|                   | Least prefer dramatherapy           | 0.83                                 | 0.27 | 0.44       | 1.55   |      |
|                   | Impact on mood (n=197)              | Mental health or general population  | 1.34 | 0.30       | 0.87   | 2.07 |
|                   |                                     | Male or female                       | 1.13 | 0.22       | 0.78   | 1.66 |
|                   |                                     | University educated or not           | 1.06 | 0.21       | 0.72   | 1.56 |
| Under or over 45* |                                     | 0.65                                 | 0.12 | 0.45       | 0.94   |      |

|                                |                                     |                                       |      |      |      |       |
|--------------------------------|-------------------------------------|---------------------------------------|------|------|------|-------|
|                                |                                     | Attended talking therapy*             | 0.69 | 0.13 | 0.48 | 1.01  |
|                                |                                     | Interested in taking part - no        | 0.67 | 0.15 | 0.43 | 1.04  |
|                                |                                     | Interested in taking part – not sure  | 0.66 | 0.16 | 0.41 | 1.07  |
|                                |                                     | Attended arts therapies               | 1.17 | 0.47 | 0.54 | 2.55  |
|                                |                                     | Attended art therapy                  | 0.91 | 0.40 | 0.38 | 2.17  |
|                                |                                     | Most prefer art therapy*              | 0.44 | 0.14 | 0.24 | 0.81  |
|                                |                                     | Most prefer dance-movement therapy    | 0.94 | 0.19 | 0.63 | 1.40  |
|                                |                                     | Most prefer dramatherapy*             | 0.07 | 0.08 | 0.01 | 0.56  |
|                                |                                     | Least prefer art therapy              | 1.22 | 0.53 | 0.52 | 2.87  |
|                                |                                     | Least prefer dance-movement therapy   | 1.11 | 0.56 | 0.41 | 2.98  |
|                                |                                     | Least prefer dramatherapy             | 1.75 | 0.74 | 0.77 | 3.99  |
|                                | Other (n=222)                       | Mental health or general population   | 1.16 | 0.25 | 0.76 | 1.77  |
|                                |                                     | Male or female                        | 0.83 | 0.16 | 0.57 | 1.20  |
|                                |                                     | University educated or not*           | 1.71 | 0.33 | 1.17 | 2.49  |
|                                |                                     | Under or over 45                      | 1.36 | 0.24 | 0.97 | 1.92  |
|                                |                                     | Attended talking therapy              | 0.98 | 0.18 | 0.69 | 1.39  |
|                                |                                     | Interested in taking part - no        | 1.29 | 0.27 | 0.86 | 1.94  |
|                                |                                     | Interested in taking part – not sure  | 1.19 | 0.27 | 0.76 | 1.85  |
|                                |                                     | Attended arts therapies               | 0.72 | 0.35 | 0.28 | 1.86  |
|                                |                                     | Attended art therapy                  | 0.90 | 0.47 | 0.32 | 2.53  |
|                                |                                     | Most prefer art therapy               | 1.64 | 0.50 | 0.90 | 2.98  |
|                                |                                     | Most prefer dance-movement therapy*   | 4.95 | 1.14 | 3.14 | 7.78  |
|                                |                                     | Most prefer dramatherapy*             | 5.45 | 1.81 | 2.85 | 10.43 |
|                                |                                     | Least prefer art therapy              | 0.71 | 0.23 | 0.38 | 1.32  |
|                                |                                     | Least prefer dance-movement therapy   | 1.16 | 0.44 | 0.56 | 2.43  |
|                                | Least prefer dramatherapy           | 1.18                                  | 0.37 | 0.65 | 2.17 |       |
| Mental health patients (n=678) | Enjoyment (n=276)                   | (Base outcome)                        |      |      |      |       |
|                                | Expectations of helpfulness (n=135) | Male or female                        | 1.38 | 0.32 | 0.87 | 2.18  |
|                                |                                     | University educated or not*           | 1.61 | 0.40 | 0.99 | 2.61  |
|                                |                                     | Attended talking therapy              | 0.73 | 0.20 | 0.42 | 1.25  |
|                                |                                     | Heard of the arts therapies           | 1.60 | 0.55 | 0.81 | 3.16  |
|                                |                                     | Interested in taking part - no        | 0.58 | 0.18 | 0.32 | 1.05  |
|                                |                                     | Interested in taking part – not sure* | 0.40 | 0.16 | 0.19 | 0.86  |
|                                |                                     | Attended arts therapies               | 0.51 | 0.34 | 0.14 | 1.85  |
|                                |                                     | Attended music therapy                | 1.25 | 0.46 | 0.61 | 2.58  |
|                                |                                     | Attended art therapy                  | 2.41 | 1.48 | 0.72 | 8.05  |
|                                |                                     | Most prefer art therapy               | 1.68 | 0.65 | 0.79 | 3.57  |
|                                |                                     | Most prefer dance-movement therapy*   | 2.20 | 0.60 | 1.29 | 3.76  |
|                                |                                     | Most prefer dramatherapy*             | 2.40 | 0.94 | 1.11 | 5.19  |
|                                | Male or female                      | 0.86                                  | 0.21 | 0.53 | 1.39 |       |

|                                   |                                     |                                      |      |      |       |       |
|-----------------------------------|-------------------------------------|--------------------------------------|------|------|-------|-------|
|                                   | Feeling capable (n=110)             | University educated or not*          | 1.79 | 0.46 | 1.08  | 2.95  |
|                                   |                                     | Attended talking therapy             | 0.72 | 0.20 | 0.42  | 1.22  |
|                                   |                                     | Heard of the arts therapies          | 0.89 | 0.27 | 0.49  | 1.63  |
|                                   |                                     | Interested in taking part - no       | 1.49 | 0.41 | 0.87  | 2.55  |
|                                   |                                     | Interested in taking part – not sure | 1.05 | 0.36 | 0.54  | 2.04  |
|                                   |                                     | Attended arts therapies              | 1.56 | 0.90 | 0.51  | 4.80  |
|                                   |                                     | Attended music therapy               | 0.98 | 0.41 | 0.43  | 2.24  |
|                                   |                                     | Attended art therapy                 | 0.68 | 0.36 | 0.24  | 1.90  |
|                                   |                                     | Most prefer art therapy              | 1.02 | 0.44 | 0.44  | 2.39  |
|                                   |                                     | Most prefer dance-movement therapy*  | 1.93 | 0.54 | 1.12  | 3.33  |
|                                   |                                     | Most prefer dramatherapy*            | 2.18 | 0.86 | 1.00  | 4.74  |
|                                   | Impact on mood (n=78)               | Male or female                       | 1.56 | 0.43 | 0.91  | 2.68  |
|                                   |                                     | University educated or not           | 1.11 | 0.34 | 0.61  | 2.02  |
|                                   |                                     | Attended talking therapy*            | 0.49 | 0.17 | 0.25  | 0.97  |
|                                   |                                     | Heard of the arts therapies          | 1.11 | 0.43 | 0.52  | 2.35  |
|                                   |                                     | Interested in taking part - no       | 0.98 | 0.32 | 0.52  | 1.86  |
|                                   |                                     | Interested in taking part – not sure | 0.77 | 0.31 | 0.35  | 1.69  |
|                                   |                                     | Attended arts therapies              | 1.56 | 0.95 | 0.47  | 5.13  |
|                                   |                                     | Attended music therapy               | 1.64 | 0.74 | 0.68  | 3.99  |
|                                   |                                     | Attended art therapy                 | 0.64 | 0.34 | 0.23  | 1.82  |
|                                   |                                     | Most prefer art therapy              | 0.51 | 0.27 | 0.18  | 1.44  |
|                                   | Most prefer dance-movement therapy  | 0.95                                 | 0.29 | 0.52 | 1.74  |       |
|                                   | Most prefer dramatherapy            | 0.00                                 | 0.00 | 0.00 | .     |       |
|                                   | Other (n=79)                        | Male or female                       | 1.21 | 0.35 | 0.69  | 2.13  |
|                                   |                                     | University educated or not           | 1.63 | 0.49 | 0.90  | 2.96  |
|                                   |                                     | Attended talking therapy             | 1.00 | 0.32 | 0.54  | 1.88  |
|                                   |                                     | Heard of the arts therapies          | 0.87 | 0.31 | 0.44  | 1.73  |
|                                   |                                     | Interested in taking part - no       | 1.12 | 0.39 | 0.56  | 2.22  |
|                                   |                                     | Interested in taking part – not sure | 1.34 | 0.50 | 0.65  | 2.79  |
|                                   |                                     | Attended arts therapies              | 0.57 | 0.51 | 0.10  | 3.28  |
|                                   |                                     | Attended music therapy               | 1.01 | 0.55 | 0.34  | 2.94  |
|                                   |                                     | Attended art therapy                 | 1.31 | 1.11 | 0.25  | 6.96  |
|                                   |                                     | Most prefer art therapy*             | 3.89 | 1.93 | 1.48  | 10.27 |
|                                   | Most prefer dance-movement therapy* | 5.72                                 | 2.22 | 2.67 | 12.26 |       |
|                                   | Most prefer dramatherapy*           | 9.46                                 | 4.46 | 3.75 | 23.84 |       |
| General population sample (n=841) | Enjoyment (n=302)                   | (Base outcome)                       |      |      |       |       |
|                                   | Expectations of helpfulness (n=159) | University educated or not*          | 1.71 | 0.39 | 1.09  | 2.69  |
|                                   |                                     | Most prefer art therapy*             | 2.01 | 0.63 | 1.09  | 3.70  |
|                                   |                                     | Most prefer dance-movement therapy*  | 2.25 | 0.59 | 1.35  | 3.76  |
|                                   |                                     | Most prefer dramatherapy*            | 3.59 | 1.41 | 1.67  | 7.73  |
|                                   | Least prefer art therapy            | 0.79                                 | 0.31 | 0.37 | 1.69  |       |

|  |                                     |                                     |                            |      |      |      |
|--|-------------------------------------|-------------------------------------|----------------------------|------|------|------|
|  |                                     | Least prefer dance-movement therapy | 0.78                       | 0.35 | 0.32 | 1.88 |
|  |                                     | Least prefer dramatherapy           | 0.61                       | 0.23 | 0.29 | 1.26 |
|  | Feeling capable (n=118)             | University educated or not*         | 1.75                       | 0.45 | 1.07 | 2.88 |
|  |                                     | Most prefer art therapy*            | 0.41                       | 0.16 | 0.19 | 0.90 |
|  |                                     | Most prefer dance-movement therapy  | 1.11                       | 0.29 | 0.67 | 1.85 |
|  |                                     | Most prefer dramatherapy            | 1.95                       | 0.79 | 0.89 | 4.30 |
|  |                                     | Least prefer art therapy            | 0.67                       | 0.29 | 0.29 | 1.55 |
|  |                                     | Least prefer dance-movement therapy | 0.73                       | 0.37 | 0.27 | 1.98 |
|  |                                     | Least prefer dramatherapy           | 0.54                       | 0.23 | 0.23 | 1.24 |
|  |                                     | Impact on mood (n=119)              | University educated or not | 1.14 | 0.27 | 0.72 |
|  | Most prefer art therapy             |                                     | 0.54                       | 0.19 | 0.27 | 1.09 |
|  | Most prefer dance-movement therapy  |                                     | 1.08                       | 0.27 | 0.67 | 1.77 |
|  | Most prefer dramatherapy            |                                     | 0.32                       | 0.25 | 0.07 | 1.49 |
|  | Least prefer art therapy            |                                     | 1.29                       | 0.78 | 0.40 | 4.21 |
|  | Least prefer dance-movement therapy |                                     | 0.97                       | 0.70 | 0.23 | 4.01 |
|  | Other (n=143)                       | Least prefer dramatherapy           | 1.78                       | 1.03 | 0.57 | 5.56 |
|  |                                     | University educated or not          | 1.44                       | 0.34 | 0.91 | 2.28 |
|  |                                     | Most prefer art therapy             | 1.00                       | 0.37 | 0.49 | 2.05 |
|  |                                     | Most prefer dance-movement therapy* | 3.65                       | 0.99 | 2.15 | 6.20 |
|  |                                     | Most prefer dramatherapy*           | 2.94                       | 1.29 | 1.25 | 6.96 |
|  |                                     | Least prefer art therapy            | 0.67                       | 0.28 | 0.29 | 1.51 |
|  |                                     | Least prefer dance-movement therapy | 1.17                       | 0.59 | 0.44 | 3.13 |
|  |                                     | Least prefer dramatherapy           | 0.82                       | 0.33 | 0.37 | 1.80 |

RRR=relative risk, CI=confidence interval, \*=significant variables at 5%

STROBE Statement—Checklist of items that should be included in reports of *cross-sectional studies*

|                              | Item No | Recommendation                                                                                                                                                                                    | Page No          |
|------------------------------|---------|---------------------------------------------------------------------------------------------------------------------------------------------------------------------------------------------------|------------------|
| <b>Title and abstract</b>    | 1       | (a) Indicate the study's design with a commonly used term in the title or the abstract                                                                                                            | 1                |
|                              |         | (b) Provide in the abstract an informative and balanced summary of what was done and what was found                                                                                               | 1                |
| <b>Introduction</b>          |         |                                                                                                                                                                                                   |                  |
| Background/rationale         | 2       | Explain the scientific background and rationale for the investigation being reported                                                                                                              | 2                |
| Objectives                   | 3       | State specific objectives, including any prespecified hypotheses                                                                                                                                  | 4                |
| <b>Methods</b>               |         |                                                                                                                                                                                                   |                  |
| Study design                 | 4       | Present key elements of study design early in the paper                                                                                                                                           | 4                |
| Setting                      | 5       | Describe the setting, locations, and relevant dates, including periods of recruitment, exposure, follow-up, and data collection                                                                   | 4                |
| Participants                 | 6       | (a) Give the eligibility criteria, and the sources and methods of selection of participants                                                                                                       | 4                |
| Variables                    | 7       | Clearly define all outcomes, exposures, predictors, potential confounders, and effect modifiers. Give diagnostic criteria, if applicable                                                          | 4                |
| Data sources/<br>measurement | 8*      | For each variable of interest, give sources of data and details of methods of assessment (measurement). Describe comparability of assessment methods if there is more than one group              | 5                |
| Bias                         | 9       | Describe any efforts to address potential sources of bias                                                                                                                                         | N/A              |
| Study size                   | 10      | Explain how the study size was arrived at                                                                                                                                                         | 16               |
| Quantitative variables       | 11      | Explain how quantitative variables were handled in the analyses. If applicable, describe which groupings were chosen and why                                                                      | 5                |
| Statistical methods          | 12      | (a) Describe all statistical methods, including those used to control for confounding                                                                                                             | 5                |
|                              |         | (b) Describe any methods used to examine subgroups and interactions                                                                                                                               | 5                |
|                              |         | (c) Explain how missing data were addressed                                                                                                                                                       | 5                |
|                              |         | (d) If applicable, describe analytical methods taking account of sampling strategy                                                                                                                | 5                |
|                              |         | (e) Describe any sensitivity analyses                                                                                                                                                             | N/A              |
| <b>Results</b>               |         |                                                                                                                                                                                                   |                  |
| Participants                 | 13*     | (a) Report numbers of individuals at each stage of study—eg numbers potentially eligible, examined for eligibility, confirmed eligible, included in the study, completing follow-up, and analysed | 7 and supplement |
|                              |         | (b) Give reasons for non-participation at each stage                                                                                                                                              | N/A              |
|                              |         | (c) Consider use of a flow diagram                                                                                                                                                                | N/A              |
| Descriptive data             | 14*     | (a) Give characteristics of study participants (eg demographic, clinical, social) and information on exposures and potential confounders                                                          | 6 and supplement |
|                              |         | (b) Indicate number of participants with missing data for each variable of interest                                                                                                               | supplement       |
| Outcome data                 | 15*     | Report numbers of outcome events or summary measures                                                                                                                                              | 7                |
